# Supplementary material for: Endothelial SIRPα signaling controls VE-cadherin endocytosis for thymic homing of progenitor cells
Source: eLife. 2022 May 5;11:e69219. doi: 10.7554/eLife.69219 (PMC9071265; doi:10.7554/eLife.69219)
Supplement: Figure 1—figure supplement 1—source data 1. [file elife-69219-fig1-figsupp1-data1.xlsx]

## Sheet: Fig.1S1.B
SIRPα MFI on TPECs
w/ PVS	w/o PVS
968.285	693.342
682.581	787.616
716.223	506.049
829.541	768.829
698.317	696.152
743.359	930.545
798.442	1006.54
	893.747
	908.317
Supplymentary Fig.6 Panel D,E (Reciprocally labeling)
CD47KOEC_Coloc_hIg-T (PE)
time frame	1	2	3	4	5	6	7	8	9	10	11	12	13	14	15	16	17	18	19	20	21	22	23	24	25	26	27	28	29	30	31	32	33	34	35	36	37	38	39	40	41	42	43	44	45	46	47	48	49
threshold A	639.84	639.84	639.84	639.84	639.84	639.84	639.84	639.84	639.84	639.84	639.84	639.84	639.84	639.84	639.84	639.84	639.84	639.84	639.84	639.84	639.84	639.84	639.84	639.84	639.84	639.84	639.84	639.84	639.84	639.84	639.84	639.84	639.84	639.84	639.84	639.84	639.84	639.84	639.84	639.84	639.84	639.84	639.84	639.84	639.84	639.84	639.84	639.84	639.84
threshold B	1391.66	1391.66	1391.66	1391.66	1391.66	1391.66	1391.66	1391.66	1391.66	1391.66	1391.66	1391.66	1391.66	1391.66	1391.66	1391.66	1391.66	1391.66	1391.66	1391.66	1391.66	1391.66	1391.66	1391.66	1391.66	1391.66	1391.66	1391.66	1391.66	1391.66	1391.66	1391.66	1391.66	1391.66	1391.66	1391.66	1391.66	1391.66	1391.66	1391.66	1391.66	1391.66	1391.66	1391.66	1391.66	1391.66	1391.66	1391.66	1391.66
number of colocalized voxels	0	0	0	0	0	0	0	0	0	0	0	0	0	0	177	213	342	259	325	267	416	456	422	370	419	403	391	256	335	321	320	156	149	177	161	175	279	289	396	315	529	320	436	360	306	292	343	330	230
% of dataset colocalized	0	0	0	0	0	0	0	0	0	0	0	0	0	0	0.02	0.02	0.03	0.02	0.03	0.03	0.04	0.04	0.04	0.04	0.04	0.04	0.04	0.02	0.03	0.03	0.03	0.01	0.01	0.02	0.02	0.02	0.03	0.03	0.04	0.03	0.05	0.03	0.04	0.03	0.03	0.03	0.03	0.03	0.02
% of ROI colocalized	0	0	0	0	0	0	0	0	0	0	0	0	0	0	10.25	10.17	17.07	6.84	6.58	6.25	7.84	8.05	7.92	6.95	8.07	7.73	6.81	5.26	7.01	7.12	8.09	8.62	8.83	10.83	10.08	12.78	8.57	5.82	6.66	4.45	6.86	3.74	4.82	4.17	3.53	3.34	4.2	4.32	2.9
% of volume A above threshold colocalized	0	0	0	0	0	0	0	0	0	0	0	0	0	0	59	59.33	77.55	34.63	37.75	39.67	40.08	37.69	40.11	34.01	38.33	37.45	34.45	29.66	33.63	27.79	33.54	40.1	40.16	44.58	39.08	44.08	40.97	40.03	42.22	32.85	47.36	28.57	38.82	34.16	31.19	28.13	34.54	32.01	27.38
% of volume B above threshold colocalized	0	0	0	0	0	0	0	0	0	0	0	0	0	0	29.8	22.05	33.17	26.32	23.07	22.78	31.09	38.45	36.92	32.31	37.58	41.21	32.18	27.74	34.08	42.97	46.78	34.36	36.17	37.9	39.36	46.3	48.27	35.2	35.23	31.16	34.31	25.81	28.93	26.91	20.87	22.51	26.16	26.15	18.33
% of material A above threshold colocalized	0	0	0	0	0	0	0	0	0	0	0	0	0	0	60.69	55.93	81.01	42.27	40.65	41.27	44.16	44.57	46.95	37.51	45.32	42.91	42.1	34.73	37.41	32.75	39.06	43.08	45.91	42.03	40.29	47.21	49.6	47.56	52.93	40.08	54.82	36.17	47.57	39.38	33.63	31.38	37.14	37.29	31.42
% of material B above threshold colocalized	0	0	0	0	0	0	0	0	0	0	0	0	0	0	32.28	24.06	38.31	28.33	26.17	24.29	33.76	40.55	40.26	35.28	41.68	43.91	34.23	29.03	36.29	44.91	49.32	37.61	41.49	40.81	42.53	51.06	51.54	39.97	38.37	36.15	36.86	29.4	32.14	30.17	23.66	24.64	28.26	28.05	20.37
% of ROI material A colocalized	0	0	0	0	0	0	0	0	0	0	0	0	0	0	39.03	36.69	59.47	27.38	26.4	27.04	31.73	33.15	34.86	27.46	34	31.97	30.43	24.6	27.7	25.53	29.93	32.21	35.42	33.98	33.03	38.78	37.27	32.02	35.04	25.6	37.16	23.1	30.11	24.57	20.53	19.76	23.71	24.77	18.56
% of ROI material B colocalized	0	0	0	0	0	0	0	0	0	0	0	0	0	0	19.7	16.5	28.76	15.82	15.8	14.12	19.29	21.25	21.09	18.12	21.49	21.37	17.87	13.41	17.57	19.56	22.62	17.63	19.1	20.53	20.32	26.33	22.83	15.87	19.76	14.56	19.15	12.71	15.15	13.7	10.86	9.93	12.34	12.2	9.08
Pearson's coefficient in dataset volume	0.3352	0.3213	0.3141	0.2971	0.3116	0.3118	0.3181	0.3139	0.3087	0.3017	0.2317	0.3063	0.3099	0.3055	0.3024	0.3022	0.3067	0.3082	0.3026	0.2977	0.3076	0.2999	0.2914	0.2874	0.3011	0.299	0.2938	0.2924	0.3039	0.304	0.2909	0.3031	0.2974	0.2971	0.2996	0.2981	0.2941	0.2903	0.2896	0.2987	0.2993	0.3053	0.305	0.3102	0.3005	0.2925	0.2994	0.2968	0.3056
Pearson's coefficient in ROI volume	0	0	0	0	0	0	0	0	0	0	0	0	0	0	0.2545	0.1639	0.3753	0.1604	0.1605	0.1761	0.2552	0.3077	0.3264	0.2396	0.3162	0.3068	0.2672	0.199	0.2437	0.2901	0.3478	0.274	0.3706	0.2493	0.2843	0.3354	0.4022	0.3865	0.3774	0.3287	0.3453	0.2848	0.3501	0.3232	0.2196	0.2014	0.2559	0.2552	0.2249
Pearson's coefficient in colocalized volume	0	0	0	0	0	0	0	0	0	0	0	0	0	0	-0.2112	0.0044	0.0511	0.0952	0.0968	0.0078	0.1518	0.1137	0.0947	0.049	0.0542	0.1435	0.1894	-0.0026	0.1991	0.2257	0.2345	0.4335	0.4857	0.548	0.468	0.3335	0.4024	0.5291	0.4047	0.5483	0.3415	0.4625	0.4492	0.5375	0.4015	0.073	0.3863	0.2586	0.3621
original Mander's coefficient A	0.9672	0.9664	0.9665	0.9656	0.966	0.9647	0.9664	0.9657	0.9649	0.9657	0.9585	0.9661	0.9628	0.966	0.9647	0.9661	0.9661	0.9663	0.9659	0.9659	0.964	0.9658	0.9679	0.9687	0.9677	0.9661	0.9663	0.9674	0.9663	0.9662	0.9674	0.9641	0.9654	0.9651	0.9639	0.9644	0.9647	0.9635	0.9606	0.9609	0.9629	0.9597	0.9592	0.9579	0.9615	0.9602	0.9622	0.9613	0.9605
original Mander's coefficient B	0.9304	0.9254	0.9235	0.9194	0.9218	0.9214	0.9188	0.928	0.9295	0.9225	0.9196	0.9217	0.9232	0.9228	0.9237	0.9165	0.9161	0.9173	0.9195	0.9164	0.9178	0.9119	0.9105	0.9074	0.9132	0.9092	0.9093	0.9059	0.9109	0.9147	0.9074	0.9088	0.9083	0.9063	0.9076	0.9062	0.9048	0.9026	0.9067	0.9089	0.9064	0.9069	0.9087	0.9023	0.9034	0.9058	0.9015	0.8981	0.8985
thresholded Mander's coefficient A	0	0	0	0	0	0	0	0	0	0	0	0	0	0	0.0006	0.0008	0.0013	0.0011	0.0013	0.0011	0.0017	0.002	0.0019	0.0016	0.0019	0.0017	0.0018	0.0012	0.0014	0.0014	0.0014	0.0006	0.0007	0.0007	0.0008	0.0008	0.0013	0.0014	0.0019	0.0014	0.0025	0.0016	0.0021	0.0017	0.0015	0.0014	0.0016	0.0017	0.0012
thresholded Mander's coefficient B	0	0	0	0	0	0	0	0	0	0	0	0	0	0	0.0006	0.0007	0.0012	0.001	0.0014	0.0011	0.0017	0.0018	0.0015	0.0014	0.0016	0.0015	0.0015	0.001	0.0013	0.0013	0.0012	0.0006	0.0006	0.0006	0.0006	0.0007	0.001	0.0011	0.0016	0.0014	0.0019	0.0015	0.0018	0.0016	0.0013	0.0013	0.0014	0.0014	0.0011
CD47KOEC_Coloc_CV1-T (V450)
time frame	1	2	3	4	5	6	7	8	9	10	11	12	13	14	15	16	17	18	19	20	21	22	23	24	25	26	27	28	29	30	31	32	33	34	35	36	37	38	39	40	41	42	43	44	45	46	47	48	49
threshold A	639.84	639.84	639.84	639.84	639.84	639.84	639.84	639.84	639.84	639.84	639.84	639.84	639.84	639.84	639.84	639.84	639.84	639.84	639.84	639.84	639.84	639.84	639.84	639.84	639.84	639.84	639.84	639.84	639.84	639.84	639.84	639.84	639.84	639.84	639.84	639.84	639.84	639.84	639.84	639.84	639.84	639.84	639.84	639.84	639.84	639.84	639.84	639.84	639.84
threshold B	1391.66	1391.66	1391.66	1391.66	1391.66	1391.66	1391.66	1391.66	1391.66	1391.66	1391.66	1391.66	1391.66	1391.66	1391.66	1391.66	1391.66	1391.66	1391.66	1391.66	1391.66	1391.66	1391.66	1391.66	1391.66	1391.66	1391.66	1391.66	1391.66	1391.66	1391.66	1391.66	1391.66	1391.66	1391.66	1391.66	1391.66	1391.66	1391.66	1391.66	1391.66	1391.66	1391.66	1391.66	1391.66	1391.66	1391.66	1391.66	1391.66
number of colocalized voxels	0	0	0	0	0	0	0	0	0	0	0	40	48	57	27	17	165	175	200	156	158	54	174	299	204	358	320	382	289	227	212	39	52	89	51	40	154	252	126	185	281	341	276	181	277	188	105	141	194
% of dataset colocalized	0	0	0	0	0	0	0	0	0	0	0	0	0	0.01	0	0	0.02	0.02	0.02	0.01	0.02	0.01	0.02	0.03	0.02	0.03	0.03	0.04	0.03	0.02	0.02	0	0	0.01	0	0	0.01	0.02	0.01	0.02	0.03	0.03	0.03	0.02	0.03	0.02	0.01	0.01	0.02
% of ROI colocalized	0	0	0	0	0	0	0	0	0	0	0	10.67	9.28	6.51	2.9	1.01	8.21	8.74	11.74	13.53	12.04	3.65	8.45	12.38	9.57	9.22	9.22	10.06	7.22	6.18	6.49	2.96	3.78	7.35	3.86	3.48	9.57	14.17	6.42	8.87	12.11	13.16	8.94	5.78	8.66	5.59	3.02	3.95	5.07
% of volume A above threshold colocalized	0	0	0	0	0	0	0	0	0	0	0	42.55	33.33	40.71	22.31	13.82	55.74	46.05	52.08	65.55	59.4	45	51.63	64.86	68.46	57.19	61.42	62.93	54.94	46.04	45.79	54.93	27.81	79.46	61.45	64.52	49.52	59.02	40.51	48.56	50.18	46.65	41.69	31.37	56.76	41.05	33.44	38.21	47.9
% of volume B above threshold colocalized	0	0	0	0	0	0	0	0	0	0	0	28.78	22.86	27.8	18.75	20.24	45.21	61.19	56.5	58.43	49.38	29.67	24.27	30.92	21.63	33.52	35.71	33.78	27.98	25.8	25.03	32.77	33.77	43.41	33.55	26.32	50.33	73.04	34.62	46.37	50.72	54.47	42.33	36.57	33.37	24.45	12.43	17.6	23.52
% of material A above threshold colocalized	0	0	0	0	0	0	0	0	0	0	0	35.55	25.01	37.93	20.56	13.92	58.68	45.89	55.71	72.94	68.73	57.43	51.59	68.11	72.18	60.56	66.57	70.25	56.93	48.16	52.08	65.65	24.25	87.59	73.39	75.61	59.48	68.56	41.43	55.22	56.68	54.05	45.15	35.52	58.5	44.94	35.68	42.4	51.6
% of material B above threshold colocalized	0	0	0	0	0	0	0	0	0	0	0	28.74	22.89	28.14	17.22	22.64	51.57	66.68	60.78	64.38	52.39	30.06	25.37	32.93	23.28	35.21	36.96	35.57	28.99	25.75	25.09	36.88	35.81	49.57	38.27	32.15	53.07	76.41	36.56	47.03	50.64	52.27	40.93	35.43	33.93	23.93	11.86	17.91	23.3
% of ROI material A colocalized	0	0	0	0	0	0	0	0	0	0	0	28.31	20.57	31.16	15.96	8.42	44.72	37.68	46.47	60.12	55.63	31.73	37.24	51.75	49.41	45.99	50.96	52.6	40.36	33.74	37.23	30.64	16.86	55.7	39.82	40.04	48.85	61.05	30.23	44.15	48.81	47.36	37.51	27.44	46.06	31.99	22.58	27.35	34.79
% of ROI material B colocalized	0	0	0	0	0	0	0	0	0	0	0	19.07	15.81	14.89	6.86	3.25	22.73	26.5	29.29	32.07	26.39	10.57	16.39	22.67	16.93	20.54	21.02	21.79	16.71	14.13	14.95	10.28	11.1	23.49	14.16	13.01	24.17	38.11	18.15	23.73	28.08	28	20.4	16.31	20.9	13.3	6.74	10.22	12.57
Pearson's coefficient in dataset volume	0.3352	0.3213	0.3141	0.2971	0.3116	0.3118	0.3181	0.3139	0.3087	0.3017	0.2317	0.3063	0.3099	0.3055	0.3024	0.3022	0.3067	0.3082	0.3026	0.2977	0.3076	0.2999	0.2914	0.2874	0.3011	0.299	0.2938	0.2924	0.3039	0.304	0.2909	0.3031	0.2974	0.2971	0.2996	0.2981	0.2941	0.2903	0.2896	0.2987	0.2993	0.3053	0.305	0.3102	0.3005	0.2925	0.2994	0.2968	0.3056
Pearson's coefficient in ROI volume	0	0	0	0	0	0	0	0	0	0	0	0.0207	-0.1063	0.1929	0.0564	0.1535	0.4632	0.4447	0.4796	0.5766	0.4835	0.3279	0.1447	0.2974	0.2867	0.3502	0.3721	0.3947	0.297	0.1979	0.2273	0.5554	0.2796	0.6705	0.5417	0.5881	0.555	0.688	0.2908	0.4143	0.4144	0.3756	0.3281	0.2917	0.3137	0.2091	0.1135	0.187	0.2499
Pearson's coefficient in colocalized volume	0	0	0	0	0	0	0	0	0	0	0	-0.0721	0.2299	-0.2952	-0.1212	0.0015	0.3498	0.1187	0.2668	0.1468	0.1838	0.1208	-0.0123	0.1665	0.2419	0.0334	-0.004	0.2324	0.0953	0.008	-0.1362	0.6263	0.3375	0.5827	0.2555	0.7461	0.2768	0.4233	0.1481	0.1415	0.1234	-0.0781	0.0326	-0.0951	-0.0918	-0.157	-0.3203	0.1223	-0.082
original Mander's coefficient A	0.9672	0.9664	0.9665	0.9656	0.966	0.9647	0.9664	0.9657	0.9649	0.9657	0.9585	0.9661	0.9628	0.966	0.9647	0.9661	0.9661	0.9663	0.9659	0.9659	0.964	0.9658	0.9679	0.9687	0.9677	0.9661	0.9663	0.9674	0.9663	0.9662	0.9674	0.9641	0.9654	0.9651	0.9639	0.9644	0.9647	0.9635	0.9606	0.9609	0.9629	0.9597	0.9592	0.9579	0.9615	0.9602	0.9622	0.9613	0.9605
original Mander's coefficient B	0.9304	0.9254	0.9235	0.9194	0.9218	0.9214	0.9188	0.928	0.9295	0.9225	0.9196	0.9217	0.9232	0.9228	0.9237	0.9165	0.9161	0.9173	0.9195	0.9164	0.9178	0.9119	0.9105	0.9074	0.9132	0.9092	0.9093	0.9059	0.9109	0.9147	0.9074	0.9088	0.9083	0.9063	0.9076	0.9062	0.9048	0.9026	0.9067	0.9089	0.9064	0.9069	0.9087	0.9023	0.9034	0.9058	0.9015	0.8981	0.8985
thresholded Mander's coefficient A	0	0	0	0	0	0	0	0	0	0	0	0.0001	0.0002	0.0003	0.0001	0.0001	0.0007	0.0007	0.0009	0.0008	0.0008	0.0002	0.0007	0.0013	0.0009	0.0015	0.0014	0.0017	0.0012	0.0009	0.001	0.0002	0.0002	0.0004	0.0002	0.0002	0.0009	0.0015	0.0005	0.001	0.0015	0.0018	0.0014	0.0009	0.0013	0.0009	0.0006	0.0007	0.0009
thresholded Mander's coefficient B	0	0	0	0	0	0	0	0	0	0	0	0.0001	0.0002	0.0002	0.0001	0.0001	0.0006	0.0007	0.0007	0.0005	0.0005	0.0002	0.0006	0.0009	0.0006	0.0012	0.0009	0.0011	0.0009	0.0007	0.0007	0.0001	0.0002	0.0003	0.0002	0.0001	0.0005	0.0009	0.0005	0.0007	0.0011	0.0013	0.0011	0.0009	0.001	0.0007	0.0005	0.0006	0.0007
One frame of real-time imaging and analysis of VE-cadherin colocalizaiton with surface junctional marker CD31 (arrowhead)
[truncated: 8 more columns]

## Sheet: Fig.1S1.C
SIRPα MFI on TPECs
WT	Ltbr-/-
1677	1935
2032	1482
1724	2579

## Sheet: Fig.1S1.D
SIRPα MFI on TPECs
Steady	SL-TBI
1815	1264
2179	1577
1728	1838
