# Supplementary material for: Endothelial SIRPα signaling controls VE-cadherin endocytosis for thymic homing of progenitor cells
Source: eLife. 2022 May 5;11:e69219. doi: 10.7554/eLife.69219 (PMC9071265; doi:10.7554/eLife.69219)
Supplement: Figure 1—source data 1. [file elife-69219-fig1-data1.xlsx]

## Sheet: Fig.1.A
Filters to generate these candidate genes
1. lookup geneid in RNA-seq result belonging to GO_0016477_cell migration
unselect N/A
2. SUM FPKM >1 across 6 dataset (3samples x 2 replicates)
3. Differential expression between 3vs1 OR 3vs2 (at least 2x)
1) log2FC=ABS(LOG((F969+G969)/(B969+C969),2))
2) =OR(log2FC(3vs1)>1,log2FC(3vs2)>1)
4. Sort 3vs1_FC from largest to smallest and fetch top 20.
5. Sort SUM(FPKM) from largest to smallest to generate heatmap.
Candidate genes
geneid	Type1.1	Type1.2	Type2.1	Type2.2	Type3.1	Type3.2	3vs1_Ttest	3vs1_FC	3vs2_Ttest	3vs2_FC	FPKM>10	3Sig in 1 or 2	In cell migration GO
Selp	7.86901	5.20149	313.105	415.607	525.779	657.06	0.0123671	6.4998	0.112305	0.698833	1924.62	TRUE	leukocyte tethering or rolling
Enpp2	81.4511	42.801	277.705	229.304	421.709	314.227	0.0331445	2.56631	0.191619	0.537569	1367.2	TRUE	cell chemotaxis
Sele	12.6876	8.84751	207.266	205.118	269.391	282.933	0.000702511	4.68075	0.00946398	0.421526	986.243	TRUE	leukocyte tethering or rolling
Vcam1	55.6736	22.1837	109.755	94.8416	276.283	161.528	0.0948598	2.4914	0.181433	1.09753	720.265	TRUE	cell chemotaxis
Sirpa	17.6801	4.00958	28.6607	25.6784	68.3546	47.5934	0.0630428	2.4184	0.0989904	1.09342	191.977	TRUE	granulocyte migration
Kank1	6.84252	7.24513	20.7754	25.2151	46.2242	53.3091	0.00682689	2.82075	0.0235275	1.11384	159.611	TRUE	glomerular visceral epithelial cell migration
Foxc1	6.97335	4.98151	18.8401	21.2763	31.9222	40.6051	0.0209524	2.60093	0.0694519	0.854332	124.599	TRUE	cell migration
Lbp	0.822463	0.549105	11.5932	14.0055	22.8214	22.9248	4.33753e-05	5.05975	0.0140599	0.837581	72.7165	TRUE	leukocyte chemotaxis involved in inflammatory response
Gpm6a	0.115163	0	3.49813	4.2788	29.4701	20.0151	0.0347802	8.74718	0.0480423	2.66972	57.3773	TRUE	neuron migration
Lama3	11.0731	14.1017	3.09776	4.39422	2.6251	1.60607	0.0224961	2.57285	0.186609	0.82429	36.898	TRUE	cell migration
Asap3	1.41935	1.70596	3.74129	9.43383	8.33772	8.74494	0.00127049	2.45046	0.56424	0.374717	33.3831	TRUE	cell migration
Lox	1.26533	0.977502	4.46806	1.44497	12.784	11.8379	0.00194699	3.45655	0.0274907	2.05797	32.7778	TRUE	cell chemotaxis
Dclk1	1.2263	0.087547	1.42939	2.27338	13.5637	8.60546	0.0546701	4.07668	0.0668308	2.58188	27.1858	TRUE	neuron migration
Agtr1a	9.02522	3.79904	10.1127	3.35868	0	0.248336	0.138116	5.69044	0.189557	5.76146	26.544	TRUE	cell chemotaxis
Ccl12	0.960879	1.53754	5.22502	2.44668	15.1476	0	0.491819	2.6	0.675337	0.981471	25.3177	TRUE	eosinophil chemotaxis
Met	0.937151	1.14617	3.31423	3.57996	8.74146	6.13193	0.039433	2.83578	0.0932034	1.10928	23.8509	TRUE	muscle cell migration
Celsr1	0.703698	0.422923	2.50928	3.90935	5.80679	9.07895	0.0525251	3.72386	0.140412	1.21359	22.431	TRUE	neuron migration
Gcnt1	1.17552	0.058816	0.762182	0.248011	7.49113	4.69597	0.0679188	3.30355	0.0589943	3.59265	14.4316	TRUE	leukocyte tethering or rolling
Flrt3	0.252444	0.0674202	1.221	0.743577	5.05456	4.01589	0.0142266	4.82564	0.0249168	2.20696	11.3549	TRUE	proepicardium cell migration involved in pericardium morphogenesis
Ephb1	3.27834	3.4075	1.03364	1.68457	0.102311	0.75265	0.0126849	2.96718	0.180147	1.66873	10.259	TRUE	cell chemotaxis
FPKM values of candidate genes
Type1=Ly6C+Selp-, Type2=Ly6C+Selp+, Type3=TPEC=Ly6C-Selp+
geneid	Type1.1	Type1.2	Type2.1	Type2.2	Type3.1	Type3.2
Selp	7.86901	5.20149	313.105	415.607	525.779	657.06
Enpp2	81.4511	42.801	277.705	229.304	421.709	314.227
Sele	12.6876	8.84751	207.266	205.118	269.391	282.933
Vcam1	55.6736	22.1837	109.755	94.8416	276.283	161.528
Sirpa	17.6801	4.00958	28.6607	25.6784	68.3546	47.5934
Kank1	6.84252	7.24513	20.7754	25.2151	46.2242	53.3091
Foxc1	6.97335	4.98151	18.8401	21.2763	31.9222	40.6051
Lbp	0.822463	0.549105	11.5932	14.0055	22.8214	22.9248
Gpm6a	0.115163	0	3.49813	4.2788	29.4701	20.0151
Lama3	11.0731	14.1017	3.09776	4.39422	2.6251	1.60607
Asap3	1.41935	1.70596	3.74129	9.43383	8.33772	8.74494
Lox	1.26533	0.977502	4.46806	1.44497	12.784	11.8379
Dclk1	1.2263	0.087547	1.42939	2.27338	13.5637	8.60546
Agtr1a	9.02522	3.79904	10.1127	3.35868	0	0.248336
Ccl12	0.960879	1.53754	5.22502	2.44668	15.1476	0
Met	0.937151	1.14617	3.31423	3.57996	8.74146	6.13193
Celsr1	0.703698	0.422923	2.50928	3.90935	5.80679	9.07895
Gcnt1	1.17552	0.058816	0.762182	0.248011	7.49113	4.69597
Flrt3	0.252444	0.0674202	1.221	0.743577	5.05456	4.01589
Ephb1	3.27834	3.4075	1.03364	1.68457	0.102311	0.75265
R scripts for Z-score based heatmap generaion:
query_Heat<-read.delim("candidate_genes.csv", sep=",") HeatCount<-query_Heat HeatCount.n<-as.matrix(HeatCount[,2:7]) library(gplots) pdf(paste('Plot_Heatmap',colname_Heat,"pdf",sep = '.'),height=11,width =5.5) heatmap.2(HeatCount.n,Rowv=F,Colv=F,scale="row", sepwidth = c(0.005,0.005),colsep=c(1:8),rowsep = c(1:length(HeatCount[,1])), sepcolor="white",lwid=c(0.01,0.01), density.info="none",trace="…

## Sheet: Fig.1.B
Sirpa FPKM
Ly6C+P-selectin-	Ly6C+P-selectin+	Ly6C-P-selectin+(TPEC)
17.6801	28.6607	68.3546
4.00958	25.6784	47.5934

## Sheet: Fig.1.D
Sirpa relative expression
I	II	TPEC
0.070375	0.209761	0.508313
0.0397255	0.119098	0.456783
0.0160512	0.143204	0.331841

## Sheet: Fig.1.F
SIRPα MFI
I	II	TPEC
117	461	746
134	538	904
129	571	870
