# Supplementary material for: Endothelial SIRPα signaling controls VE-cadherin endocytosis for thymic homing of progenitor cells
Source: eLife. 2022 May 5;11:e69219. doi: 10.7554/eLife.69219 (PMC9071265; doi:10.7554/eLife.69219)
Supplement: Figure 2—figure supplement 1—source data 1. [file elife-69219-fig2-figsupp1-data1.xlsx]

## Sheet: Fig.2S1.A
Thymocyte cell number
Sirpa+/-	Sirpa-/-
108000000	90000000
132000000	94000000
124000000	138000000
143000000	100000000
159000000	111000000
Supplymentary Fig.6 Panel D,E (Reciprocally labeling)
CD47KOEC_Coloc_hIg-T (PE)
time frame	1	2	3	4	5	6	7	8	9	10	11	12	13	14	15	16	17	18	19	20	21	22	23	24	25	26	27	28	29	30	31	32	33	34	35	36	37	38	39	40	41	42	43	44	45	46	47	48	49
threshold A	639.84	639.84	639.84	639.84	639.84	639.84	639.84	639.84	639.84	639.84	639.84	639.84	639.84	639.84	639.84	639.84	639.84	639.84	639.84	639.84	639.84	639.84	639.84	639.84	639.84	639.84	639.84	639.84	639.84	639.84	639.84	639.84	639.84	639.84	639.84	639.84	639.84	639.84	639.84	639.84	639.84	639.84	639.84	639.84	639.84	639.84	639.84	639.84	639.84
threshold B	1391.66	1391.66	1391.66	1391.66	1391.66	1391.66	1391.66	1391.66	1391.66	1391.66	1391.66	1391.66	1391.66	1391.66	1391.66	1391.66	1391.66	1391.66	1391.66	1391.66	1391.66	1391.66	1391.66	1391.66	1391.66	1391.66	1391.66	1391.66	1391.66	1391.66	1391.66	1391.66	1391.66	1391.66	1391.66	1391.66	1391.66	1391.66	1391.66	1391.66	1391.66	1391.66	1391.66	1391.66	1391.66	1391.66	1391.66	1391.66	1391.66
number of colocalized voxels	0	0	0	0	0	0	0	0	0	0	0	0	0	0	177	213	342	259	325	267	416	456	422	370	419	403	391	256	335	321	320	156	149	177	161	175	279	289	396	315	529	320	436	360	306	292	343	330	230
% of dataset colocalized	0	0	0	0	0	0	0	0	0	0	0	0	0	0	0.02	0.02	0.03	0.02	0.03	0.03	0.04	0.04	0.04	0.04	0.04	0.04	0.04	0.02	0.03	0.03	0.03	0.01	0.01	0.02	0.02	0.02	0.03	0.03	0.04	0.03	0.05	0.03	0.04	0.03	0.03	0.03	0.03	0.03	0.02
% of ROI colocalized	0	0	0	0	0	0	0	0	0	0	0	0	0	0	10.25	10.17	17.07	6.84	6.58	6.25	7.84	8.05	7.92	6.95	8.07	7.73	6.81	5.26	7.01	7.12	8.09	8.62	8.83	10.83	10.08	12.78	8.57	5.82	6.66	4.45	6.86	3.74	4.82	4.17	3.53	3.34	4.2	4.32	2.9
% of volume A above threshold colocalized	0	0	0	0	0	0	0	0	0	0	0	0	0	0	59	59.33	77.55	34.63	37.75	39.67	40.08	37.69	40.11	34.01	38.33	37.45	34.45	29.66	33.63	27.79	33.54	40.1	40.16	44.58	39.08	44.08	40.97	40.03	42.22	32.85	47.36	28.57	38.82	34.16	31.19	28.13	34.54	32.01	27.38
% of volume B above threshold colocalized	0	0	0	0	0	0	0	0	0	0	0	0	0	0	29.8	22.05	33.17	26.32	23.07	22.78	31.09	38.45	36.92	32.31	37.58	41.21	32.18	27.74	34.08	42.97	46.78	34.36	36.17	37.9	39.36	46.3	48.27	35.2	35.23	31.16	34.31	25.81	28.93	26.91	20.87	22.51	26.16	26.15	18.33
% of material A above threshold colocalized	0	0	0	0	0	0	0	0	0	0	0	0	0	0	60.69	55.93	81.01	42.27	40.65	41.27	44.16	44.57	46.95	37.51	45.32	42.91	42.1	34.73	37.41	32.75	39.06	43.08	45.91	42.03	40.29	47.21	49.6	47.56	52.93	40.08	54.82	36.17	47.57	39.38	33.63	31.38	37.14	37.29	31.42
% of material B above threshold colocalized	0	0	0	0	0	0	0	0	0	0	0	0	0	0	32.28	24.06	38.31	28.33	26.17	24.29	33.76	40.55	40.26	35.28	41.68	43.91	34.23	29.03	36.29	44.91	49.32	37.61	41.49	40.81	42.53	51.06	51.54	39.97	38.37	36.15	36.86	29.4	32.14	30.17	23.66	24.64	28.26	28.05	20.37
% of ROI material A colocalized	0	0	0	0	0	0	0	0	0	0	0	0	0	0	39.03	36.69	59.47	27.38	26.4	27.04	31.73	33.15	34.86	27.46	34	31.97	30.43	24.6	27.7	25.53	29.93	32.21	35.42	33.98	33.03	38.78	37.27	32.02	35.04	25.6	37.16	23.1	30.11	24.57	20.53	19.76	23.71	24.77	18.56
% of ROI material B colocalized	0	0	0	0	0	0	0	0	0	0	0	0	0	0	19.7	16.5	28.76	15.82	15.8	14.12	19.29	21.25	21.09	18.12	21.49	21.37	17.87	13.41	17.57	19.56	22.62	17.63	19.1	20.53	20.32	26.33	22.83	15.87	19.76	14.56	19.15	12.71	15.15	13.7	10.86	9.93	12.34	12.2	9.08
Pearson's coefficient in dataset volume	0.3352	0.3213	0.3141	0.2971	0.3116	0.3118	0.3181	0.3139	0.3087	0.3017	0.2317	0.3063	0.3099	0.3055	0.3024	0.3022	0.3067	0.3082	0.3026	0.2977	0.3076	0.2999	0.2914	0.2874	0.3011	0.299	0.2938	0.2924	0.3039	0.304	0.2909	0.3031	0.2974	0.2971	0.2996	0.2981	0.2941	0.2903	0.2896	0.2987	0.2993	0.3053	0.305	0.3102	0.3005	0.2925	0.2994	0.2968	0.3056
Pearson's coefficient in ROI volume	0	0	0	0	0	0	0	0	0	0	0	0	0	0	0.2545	0.1639	0.3753	0.1604	0.1605	0.1761	0.2552	0.3077	0.3264	0.2396	0.3162	0.3068	0.2672	0.199	0.2437	0.2901	0.3478	0.274	0.3706	0.2493	0.2843	0.3354	0.4022	0.3865	0.3774	0.3287	0.3453	0.2848	0.3501	0.3232	0.2196	0.2014	0.2559	0.2552	0.2249
Pearson's coefficient in colocalized volume	0	0	0	0	0	0	0	0	0	0	0	0	0	0	-0.2112	0.0044	0.0511	0.0952	0.0968	0.0078	0.1518	0.1137	0.0947	0.049	0.0542	0.1435	0.1894	-0.0026	0.1991	0.2257	0.2345	0.4335	0.4857	0.548	0.468	0.3335	0.4024	0.5291	0.4047	0.5483	0.3415	0.4625	0.4492	0.5375	0.4015	0.073	0.3863	0.2586	0.3621
original Mander's coefficient A	0.9672	0.9664	0.9665	0.9656	0.966	0.9647	0.9664	0.9657	0.9649	0.9657	0.9585	0.9661	0.9628	0.966	0.9647	0.9661	0.9661	0.9663	0.9659	0.9659	0.964	0.9658	0.9679	0.9687	0.9677	0.9661	0.9663	0.9674	0.9663	0.9662	0.9674	0.9641	0.9654	0.9651	0.9639	0.9644	0.9647	0.9635	0.9606	0.9609	0.9629	0.9597	0.9592	0.9579	0.9615	0.9602	0.9622	0.9613	0.9605
original Mander's coefficient B	0.9304	0.9254	0.9235	0.9194	0.9218	0.9214	0.9188	0.928	0.9295	0.9225	0.9196	0.9217	0.9232	0.9228	0.9237	0.9165	0.9161	0.9173	0.9195	0.9164	0.9178	0.9119	0.9105	0.9074	0.9132	0.9092	0.9093	0.9059	0.9109	0.9147	0.9074	0.9088	0.9083	0.9063	0.9076	0.9062	0.9048	0.9026	0.9067	0.9089	0.9064	0.9069	0.9087	0.9023	0.9034	0.9058	0.9015	0.8981	0.8985
thresholded Mander's coefficient A	0	0	0	0	0	0	0	0	0	0	0	0	0	0	0.0006	0.0008	0.0013	0.0011	0.0013	0.0011	0.0017	0.002	0.0019	0.0016	0.0019	0.0017	0.0018	0.0012	0.0014	0.0014	0.0014	0.0006	0.0007	0.0007	0.0008	0.0008	0.0013	0.0014	0.0019	0.0014	0.0025	0.0016	0.0021	0.0017	0.0015	0.0014	0.0016	0.0017	0.0012
thresholded Mander's coefficient B	0	0	0	0	0	0	0	0	0	0	0	0	0	0	0.0006	0.0007	0.0012	0.001	0.0014	0.0011	0.0017	0.0018	0.0015	0.0014	0.0016	0.0015	0.0015	0.001	0.0013	0.0013	0.0012	0.0006	0.0006	0.0006	0.0006	0.0007	0.001	0.0011	0.0016	0.0014	0.0019	0.0015	0.0018	0.0016	0.0013	0.0013	0.0014	0.0014	0.0011
CD47KOEC_Coloc_CV1-T (V450)
time frame	1	2	3	4	5	6	7	8	9	10	11	12	13	14	15	16	17	18	19	20	21	22	23	24	25	26	27	28	29	30	31	32	33	34	35	36	37	38	39	40	41	42	43	44	45	46	47	48	49
threshold A	639.84	639.84	639.84	639.84	639.84	639.84	639.84	639.84	639.84	639.84	639.84	639.84	639.84	639.84	639.84	639.84	639.84	639.84	639.84	639.84	639.84	639.84	639.84	639.84	639.84	639.84	639.84	639.84	639.84	639.84	639.84	639.84	639.84	639.84	639.84	639.84	639.84	639.84	639.84	639.84	639.84	639.84	639.84	639.84	639.84	639.84	639.84	639.84	639.84
threshold B	1391.66	1391.66	1391.66	1391.66	1391.66	1391.66	1391.66	1391.66	1391.66	1391.66	1391.66	1391.66	1391.66	1391.66	1391.66	1391.66	1391.66	1391.66	1391.66	1391.66	1391.66	1391.66	1391.66	1391.66	1391.66	1391.66	1391.66	1391.66	1391.66	1391.66	1391.66	1391.66	1391.66	1391.66	1391.66	1391.66	1391.66	1391.66	1391.66	1391.66	1391.66	1391.66	1391.66	1391.66	1391.66	1391.66	1391.66	1391.66	1391.66
number of colocalized voxels	0	0	0	0	0	0	0	0	0	0	0	40	48	57	27	17	165	175	200	156	158	54	174	299	204	358	320	382	289	227	212	39	52	89	51	40	154	252	126	185	281	341	276	181	277	188	105	141	194
% of dataset colocalized	0	0	0	0	0	0	0	0	0	0	0	0	0	0.01	0	0	0.02	0.02	0.02	0.01	0.02	0.01	0.02	0.03	0.02	0.03	0.03	0.04	0.03	0.02	0.02	0	0	0.01	0	0	0.01	0.02	0.01	0.02	0.03	0.03	0.03	0.02	0.03	0.02	0.01	0.01	0.02
% of ROI colocalized	0	0	0	0	0	0	0	0	0	0	0	10.67	9.28	6.51	2.9	1.01	8.21	8.74	11.74	13.53	12.04	3.65	8.45	12.38	9.57	9.22	9.22	10.06	7.22	6.18	6.49	2.96	3.78	7.35	3.86	3.48	9.57	14.17	6.42	8.87	12.11	13.16	8.94	5.78	8.66	5.59	3.02	3.95	5.07
% of volume A above threshold colocalized	0	0	0	0	0	0	0	0	0	0	0	42.55	33.33	40.71	22.31	13.82	55.74	46.05	52.08	65.55	59.4	45	51.63	64.86	68.46	57.19	61.42	62.93	54.94	46.04	45.79	54.93	27.81	79.46	61.45	64.52	49.52	59.02	40.51	48.56	50.18	46.65	41.69	31.37	56.76	41.05	33.44	38.21	47.9
% of volume B above threshold colocalized	0	0	0	0	0	0	0	0	0	0	0	28.78	22.86	27.8	18.75	20.24	45.21	61.19	56.5	58.43	49.38	29.67	24.27	30.92	21.63	33.52	35.71	33.78	27.98	25.8	25.03	32.77	33.77	43.41	33.55	26.32	50.33	73.04	34.62	46.37	50.72	54.47	42.33	36.57	33.37	24.45	12.43	17.6	23.52
% of material A above threshold colocalized	0	0	0	0	0	0	0	0	0	0	0	35.55	25.01	37.93	20.56	13.92	58.68	45.89	55.71	72.94	68.73	57.43	51.59	68.11	72.18	60.56	66.57	70.25	56.93	48.16	52.08	65.65	24.25	87.59	73.39	75.61	59.48	68.56	41.43	55.22	56.68	54.05	45.15	35.52	58.5	44.94	35.68	42.4	51.6
% of material B above threshold colocalized	0	0	0	0	0	0	0	0	0	0	0	28.74	22.89	28.14	17.22	22.64	51.57	66.68	60.78	64.38	52.39	30.06	25.37	32.93	23.28	35.21	36.96	35.57	28.99	25.75	25.09	36.88	35.81	49.57	38.27	32.15	53.07	76.41	36.56	47.03	50.64	52.27	40.93	35.43	33.93	23.93	11.86	17.91	23.3
% of ROI material A colocalized	0	0	0	0	0	0	0	0	0	0	0	28.31	20.57	31.16	15.96	8.42	44.72	37.68	46.47	60.12	55.63	31.73	37.24	51.75	49.41	45.99	50.96	52.6	40.36	33.74	37.23	30.64	16.86	55.7	39.82	40.04	48.85	61.05	30.23	44.15	48.81	47.36	37.51	27.44	46.06	31.99	22.58	27.35	34.79
% of ROI material B colocalized	0	0	0	0	0	0	0	0	0	0	0	19.07	15.81	14.89	6.86	3.25	22.73	26.5	29.29	32.07	26.39	10.57	16.39	22.67	16.93	20.54	21.02	21.79	16.71	14.13	14.95	10.28	11.1	23.49	14.16	13.01	24.17	38.11	18.15	23.73	28.08	28	20.4	16.31	20.9	13.3	6.74	10.22	12.57
Pearson's coefficient in dataset volume	0.3352	0.3213	0.3141	0.2971	0.3116	0.3118	0.3181	0.3139	0.3087	0.3017	0.2317	0.3063	0.3099	0.3055	0.3024	0.3022	0.3067	0.3082	0.3026	0.2977	0.3076	0.2999	0.2914	0.2874	0.3011	0.299	0.2938	0.2924	0.3039	0.304	0.2909	0.3031	0.2974	0.2971	0.2996	0.2981	0.2941	0.2903	0.2896	0.2987	0.2993	0.3053	0.305	0.3102	0.3005	0.2925	0.2994	0.2968	0.3056
Pearson's coefficient in ROI volume	0	0	0	0	0	0	0	0	0	0	0	0.0207	-0.1063	0.1929	0.0564	0.1535	0.4632	0.4447	0.4796	0.5766	0.4835	0.3279	0.1447	0.2974	0.2867	0.3502	0.3721	0.3947	0.297	0.1979	0.2273	0.5554	0.2796	0.6705	0.5417	0.5881	0.555	0.688	0.2908	0.4143	0.4144	0.3756	0.3281	0.2917	0.3137	0.2091	0.1135	0.187	0.2499
Pearson's coefficient in colocalized volume	0	0	0	0	0	0	0	0	0	0	0	-0.0721	0.2299	-0.2952	-0.1212	0.0015	0.3498	0.1187	0.2668	0.1468	0.1838	0.1208	-0.0123	0.1665	0.2419	0.0334	-0.004	0.2324	0.0953	0.008	-0.1362	0.6263	0.3375	0.5827	0.2555	0.7461	0.2768	0.4233	0.1481	0.1415	0.1234	-0.0781	0.0326	-0.0951	-0.0918	-0.157	-0.3203	0.1223	-0.082
original Mander's coefficient A	0.9672	0.9664	0.9665	0.9656	0.966	0.9647	0.9664	0.9657	0.9649	0.9657	0.9585	0.9661	0.9628	0.966	0.9647	0.9661	0.9661	0.9663	0.9659	0.9659	0.964	0.9658	0.9679	0.9687	0.9677	0.9661	0.9663	0.9674	0.9663	0.9662	0.9674	0.9641	0.9654	0.9651	0.9639	0.9644	0.9647	0.9635	0.9606	0.9609	0.9629	0.9597	0.9592	0.9579	0.9615	0.9602	0.9622	0.9613	0.9605
original Mander's coefficient B	0.9304	0.9254	0.9235	0.9194	0.9218	0.9214	0.9188	0.928	0.9295	0.9225	0.9196	0.9217	0.9232	0.9228	0.9237	0.9165	0.9161	0.9173	0.9195	0.9164	0.9178	0.9119	0.9105	0.9074	0.9132	0.9092	0.9093	0.9059	0.9109	0.9147	0.9074	0.9088	0.9083	0.9063	0.9076	0.9062	0.9048	0.9026	0.9067	0.9089	0.9064	0.9069	0.9087	0.9023	0.9034	0.9058	0.9015	0.8981	0.8985
thresholded Mander's coefficient A	0	0	0	0	0	0	0	0	0	0	0	0.0001	0.0002	0.0003	0.0001	0.0001	0.0007	0.0007	0.0009	0.0008	0.0008	0.0002	0.0007	0.0013	0.0009	0.0015	0.0014	0.0017	0.0012	0.0009	0.001	0.0002	0.0002	0.0004	0.0002	0.0002	0.0009	0.0015	0.0005	0.001	0.0015	0.0018	0.0014	0.0009	0.0013	0.0009	0.0006	0.0007	0.0009
thresholded Mander's coefficient B	0	0	0	0	0	0	0	0	0	0	0	0.0001	0.0002	0.0002	0.0001	0.0001	0.0006	0.0007	0.0007	0.0005	0.0005	0.0002	0.0006	0.0009	0.0006	0.0012	0.0009	0.0011	0.0009	0.0007	0.0007	0.0001	0.0002	0.0003	0.0002	0.0001	0.0005	0.0009	0.0005	0.0007	0.0011	0.0013	0.0011	0.0009	0.001	0.0007	0.0005	0.0006	0.0007
One frame of real-time imaging and analysis of VE-cadherin colocalizaiton with surface junctional marker CD31 (arrowhead)
[truncated: 8 more columns]

## Sheet: Fig.2S1.B,C
Proportions of thymic subsets in total thymocytes
	Sirpa+/-					Sirpa-/-
DN	5	4.1	4.6	5.7	4.3	2.7	3.3	4.3	3.4	3.3
DP	87.5	86.1	85.2	82.7	87.4	88	85.8	85.3	87.9	86.7
CD4 SP	5.5	7.2	7.1	7.9	5.7	6.9	8	7.4	6.4	6.8
CD8 SP	0.7	1.5	1.7	2.2	1.4	1.5	2	1.7	1.4	2.1
Total cell number of thymic subsets
	Sirpa+/-					Sirpa-/-
DN	5380000	5450000	5700000	8190000	6880000	2450000	3090000	5990000	3380000	3680000
DP	94500000	114000000	106000000	118000000	139000000	79200000	80600000	118000000	87900000	96200000
CD4 SP	5950000	9480000	8780000	11300000	9100000	6230000	7520000	10200000	6380000	7520000
CD8 SP	806000	1970000	2090000	3160000	2200000	1360000	1840000	2330000	1400000	2380000

## Sheet: Fig.2S1.D,E
Proportions of thymic subsets in total thymocytes (%)
	Sirpa+/-					Sirpa-/-
DN1	0.93	0.88	0.82	1.08	0.88	0.73	0.86	0.76	0.57	0.8
DN2	1.05	0.82	1.1	0.99	0.88	0.36	0.35	0.74	0.65	0.59
DN3	0.97	0.78	0.99	1.08	0.77	0.38	0.29	0.74	0.47	0.61
DN4	2.03	1.65	1.68	2.58	1.79	1.25	1.78	2.1	1.68	1.31
Total cell number of thymic subsets
	Sirpa+/-					Sirpa-/-
DN1	1000000	1160000	1020000	1550000	1400000	659000	808000	1050000	567000	885000
DN2	1130000	1080000	1370000	1420000	1400000	323000	333000	1020000	652000	660000
DN3	1050000	1040000	1230000	1540000	1230000	338000	272000	1020000	474000	677000
DN4	2190000	2170000	2080000	3680000	2850000	1130000	1670000	2900000	1680000	1450000

## Sheet: Fig.2S1.G
LSK %
Sirpa+/-	Sirpa-/-
0.28269	0.36079
0.36312	0.32698
0.27861	0.32386
	0.36514
LSK #
Sirpa+/-	Sirpa-/-
96113	117257
94411	86651
115624	111733
	127797
CLP %
Sirpa+/-	Sirpa-/-
0.02386	0.0457
0.03147	0.02865
0.03139	0.02447
	0.03441
CLP #
Sirpa+/-	Sirpa-/-
8113	14853
8182	7592
13026	8442
	12045
