# Supplementary material for: Endothelial SIRPα signaling controls VE-cadherin endocytosis for thymic homing of progenitor cells
Source: eLife. 2022 May 5;11:e69219. doi: 10.7554/eLife.69219 (PMC9071265; doi:10.7554/eLife.69219)
Supplement: Figure 2—figure supplement 2—source data 1. [file elife-69219-fig2-figsupp2-data1.xlsx]

## Sheet: Fig.2S2.C
SIRPα expression
TPEC	mTEC	cTEC
6264	1417	1332
Supplymentary Fig.6 Panel D,E (Reciprocally labeling)
CD47KOEC_Coloc_hIg-T (PE)
time frame	1	2	3	4	5	6	7	8	9	10	11	12	13	14	15	16	17	18	19	20	21	22	23	24	25	26	27	28	29	30	31	32	33	34	35	36	37	38	39	40	41	42	43	44	45	46	47	48	49
threshold A	639.84	639.84	639.84	639.84	639.84	639.84	639.84	639.84	639.84	639.84	639.84	639.84	639.84	639.84	639.84	639.84	639.84	639.84	639.84	639.84	639.84	639.84	639.84	639.84	639.84	639.84	639.84	639.84	639.84	639.84	639.84	639.84	639.84	639.84	639.84	639.84	639.84	639.84	639.84	639.84	639.84	639.84	639.84	639.84	639.84	639.84	639.84	639.84	639.84
threshold B	1391.66	1391.66	1391.66	1391.66	1391.66	1391.66	1391.66	1391.66	1391.66	1391.66	1391.66	1391.66	1391.66	1391.66	1391.66	1391.66	1391.66	1391.66	1391.66	1391.66	1391.66	1391.66	1391.66	1391.66	1391.66	1391.66	1391.66	1391.66	1391.66	1391.66	1391.66	1391.66	1391.66	1391.66	1391.66	1391.66	1391.66	1391.66	1391.66	1391.66	1391.66	1391.66	1391.66	1391.66	1391.66	1391.66	1391.66	1391.66	1391.66
number of colocalized voxels	0	0	0	0	0	0	0	0	0	0	0	0	0	0	177	213	342	259	325	267	416	456	422	370	419	403	391	256	335	321	320	156	149	177	161	175	279	289	396	315	529	320	436	360	306	292	343	330	230
% of dataset colocalized	0	0	0	0	0	0	0	0	0	0	0	0	0	0	0.02	0.02	0.03	0.02	0.03	0.03	0.04	0.04	0.04	0.04	0.04	0.04	0.04	0.02	0.03	0.03	0.03	0.01	0.01	0.02	0.02	0.02	0.03	0.03	0.04	0.03	0.05	0.03	0.04	0.03	0.03	0.03	0.03	0.03	0.02
% of ROI colocalized	0	0	0	0	0	0	0	0	0	0	0	0	0	0	10.25	10.17	17.07	6.84	6.58	6.25	7.84	8.05	7.92	6.95	8.07	7.73	6.81	5.26	7.01	7.12	8.09	8.62	8.83	10.83	10.08	12.78	8.57	5.82	6.66	4.45	6.86	3.74	4.82	4.17	3.53	3.34	4.2	4.32	2.9
% of volume A above threshold colocalized	0	0	0	0	0	0	0	0	0	0	0	0	0	0	59	59.33	77.55	34.63	37.75	39.67	40.08	37.69	40.11	34.01	38.33	37.45	34.45	29.66	33.63	27.79	33.54	40.1	40.16	44.58	39.08	44.08	40.97	40.03	42.22	32.85	47.36	28.57	38.82	34.16	31.19	28.13	34.54	32.01	27.38
% of volume B above threshold colocalized	0	0	0	0	0	0	0	0	0	0	0	0	0	0	29.8	22.05	33.17	26.32	23.07	22.78	31.09	38.45	36.92	32.31	37.58	41.21	32.18	27.74	34.08	42.97	46.78	34.36	36.17	37.9	39.36	46.3	48.27	35.2	35.23	31.16	34.31	25.81	28.93	26.91	20.87	22.51	26.16	26.15	18.33
% of material A above threshold colocalized	0	0	0	0	0	0	0	0	0	0	0	0	0	0	60.69	55.93	81.01	42.27	40.65	41.27	44.16	44.57	46.95	37.51	45.32	42.91	42.1	34.73	37.41	32.75	39.06	43.08	45.91	42.03	40.29	47.21	49.6	47.56	52.93	40.08	54.82	36.17	47.57	39.38	33.63	31.38	37.14	37.29	31.42
% of material B above threshold colocalized	0	0	0	0	0	0	0	0	0	0	0	0	0	0	32.28	24.06	38.31	28.33	26.17	24.29	33.76	40.55	40.26	35.28	41.68	43.91	34.23	29.03	36.29	44.91	49.32	37.61	41.49	40.81	42.53	51.06	51.54	39.97	38.37	36.15	36.86	29.4	32.14	30.17	23.66	24.64	28.26	28.05	20.37
% of ROI material A colocalized	0	0	0	0	0	0	0	0	0	0	0	0	0	0	39.03	36.69	59.47	27.38	26.4	27.04	31.73	33.15	34.86	27.46	34	31.97	30.43	24.6	27.7	25.53	29.93	32.21	35.42	33.98	33.03	38.78	37.27	32.02	35.04	25.6	37.16	23.1	30.11	24.57	20.53	19.76	23.71	24.77	18.56
% of ROI material B colocalized	0	0	0	0	0	0	0	0	0	0	0	0	0	0	19.7	16.5	28.76	15.82	15.8	14.12	19.29	21.25	21.09	18.12	21.49	21.37	17.87	13.41	17.57	19.56	22.62	17.63	19.1	20.53	20.32	26.33	22.83	15.87	19.76	14.56	19.15	12.71	15.15	13.7	10.86	9.93	12.34	12.2	9.08
Pearson's coefficient in dataset volume	0.3352	0.3213	0.3141	0.2971	0.3116	0.3118	0.3181	0.3139	0.3087	0.3017	0.2317	0.3063	0.3099	0.3055	0.3024	0.3022	0.3067	0.3082	0.3026	0.2977	0.3076	0.2999	0.2914	0.2874	0.3011	0.299	0.2938	0.2924	0.3039	0.304	0.2909	0.3031	0.2974	0.2971	0.2996	0.2981	0.2941	0.2903	0.2896	0.2987	0.2993	0.3053	0.305	0.3102	0.3005	0.2925	0.2994	0.2968	0.3056
Pearson's coefficient in ROI volume	0	0	0	0	0	0	0	0	0	0	0	0	0	0	0.2545	0.1639	0.3753	0.1604	0.1605	0.1761	0.2552	0.3077	0.3264	0.2396	0.3162	0.3068	0.2672	0.199	0.2437	0.2901	0.3478	0.274	0.3706	0.2493	0.2843	0.3354	0.4022	0.3865	0.3774	0.3287	0.3453	0.2848	0.3501	0.3232	0.2196	0.2014	0.2559	0.2552	0.2249
Pearson's coefficient in colocalized volume	0	0	0	0	0	0	0	0	0	0	0	0	0	0	-0.2112	0.0044	0.0511	0.0952	0.0968	0.0078	0.1518	0.1137	0.0947	0.049	0.0542	0.1435	0.1894	-0.0026	0.1991	0.2257	0.2345	0.4335	0.4857	0.548	0.468	0.3335	0.4024	0.5291	0.4047	0.5483	0.3415	0.4625	0.4492	0.5375	0.4015	0.073	0.3863	0.2586	0.3621
original Mander's coefficient A	0.9672	0.9664	0.9665	0.9656	0.966	0.9647	0.9664	0.9657	0.9649	0.9657	0.9585	0.9661	0.9628	0.966	0.9647	0.9661	0.9661	0.9663	0.9659	0.9659	0.964	0.9658	0.9679	0.9687	0.9677	0.9661	0.9663	0.9674	0.9663	0.9662	0.9674	0.9641	0.9654	0.9651	0.9639	0.9644	0.9647	0.9635	0.9606	0.9609	0.9629	0.9597	0.9592	0.9579	0.9615	0.9602	0.9622	0.9613	0.9605
original Mander's coefficient B	0.9304	0.9254	0.9235	0.9194	0.9218	0.9214	0.9188	0.928	0.9295	0.9225	0.9196	0.9217	0.9232	0.9228	0.9237	0.9165	0.9161	0.9173	0.9195	0.9164	0.9178	0.9119	0.9105	0.9074	0.9132	0.9092	0.9093	0.9059	0.9109	0.9147	0.9074	0.9088	0.9083	0.9063	0.9076	0.9062	0.9048	0.9026	0.9067	0.9089	0.9064	0.9069	0.9087	0.9023	0.9034	0.9058	0.9015	0.8981	0.8985
thresholded Mander's coefficient A	0	0	0	0	0	0	0	0	0	0	0	0	0	0	0.0006	0.0008	0.0013	0.0011	0.0013	0.0011	0.0017	0.002	0.0019	0.0016	0.0019	0.0017	0.0018	0.0012	0.0014	0.0014	0.0014	0.0006	0.0007	0.0007	0.0008	0.0008	0.0013	0.0014	0.0019	0.0014	0.0025	0.0016	0.0021	0.0017	0.0015	0.0014	0.0016	0.0017	0.0012
thresholded Mander's coefficient B	0	0	0	0	0	0	0	0	0	0	0	0	0	0	0.0006	0.0007	0.0012	0.001	0.0014	0.0011	0.0017	0.0018	0.0015	0.0014	0.0016	0.0015	0.0015	0.001	0.0013	0.0013	0.0012	0.0006	0.0006	0.0006	0.0006	0.0007	0.001	0.0011	0.0016	0.0014	0.0019	0.0015	0.0018	0.0016	0.0013	0.0013	0.0014	0.0014	0.0011
CD47KOEC_Coloc_CV1-T (V450)
time frame	1	2	3	4	5	6	7	8	9	10	11	12	13	14	15	16	17	18	19	20	21	22	23	24	25	26	27	28	29	30	31	32	33	34	35	36	37	38	39	40	41	42	43	44	45	46	47	48	49
threshold A	639.84	639.84	639.84	639.84	639.84	639.84	639.84	639.84	639.84	639.84	639.84	639.84	639.84	639.84	639.84	639.84	639.84	639.84	639.84	639.84	639.84	639.84	639.84	639.84	639.84	639.84	639.84	639.84	639.84	639.84	639.84	639.84	639.84	639.84	639.84	639.84	639.84	639.84	639.84	639.84	639.84	639.84	639.84	639.84	639.84	639.84	639.84	639.84	639.84
threshold B	1391.66	1391.66	1391.66	1391.66	1391.66	1391.66	1391.66	1391.66	1391.66	1391.66	1391.66	1391.66	1391.66	1391.66	1391.66	1391.66	1391.66	1391.66	1391.66	1391.66	1391.66	1391.66	1391.66	1391.66	1391.66	1391.66	1391.66	1391.66	1391.66	1391.66	1391.66	1391.66	1391.66	1391.66	1391.66	1391.66	1391.66	1391.66	1391.66	1391.66	1391.66	1391.66	1391.66	1391.66	1391.66	1391.66	1391.66	1391.66	1391.66
number of colocalized voxels	0	0	0	0	0	0	0	0	0	0	0	40	48	57	27	17	165	175	200	156	158	54	174	299	204	358	320	382	289	227	212	39	52	89	51	40	154	252	126	185	281	341	276	181	277	188	105	141	194
% of dataset colocalized	0	0	0	0	0	0	0	0	0	0	0	0	0	0.01	0	0	0.02	0.02	0.02	0.01	0.02	0.01	0.02	0.03	0.02	0.03	0.03	0.04	0.03	0.02	0.02	0	0	0.01	0	0	0.01	0.02	0.01	0.02	0.03	0.03	0.03	0.02	0.03	0.02	0.01	0.01	0.02
% of ROI colocalized	0	0	0	0	0	0	0	0	0	0	0	10.67	9.28	6.51	2.9	1.01	8.21	8.74	11.74	13.53	12.04	3.65	8.45	12.38	9.57	9.22	9.22	10.06	7.22	6.18	6.49	2.96	3.78	7.35	3.86	3.48	9.57	14.17	6.42	8.87	12.11	13.16	8.94	5.78	8.66	5.59	3.02	3.95	5.07
% of volume A above threshold colocalized	0	0	0	0	0	0	0	0	0	0	0	42.55	33.33	40.71	22.31	13.82	55.74	46.05	52.08	65.55	59.4	45	51.63	64.86	68.46	57.19	61.42	62.93	54.94	46.04	45.79	54.93	27.81	79.46	61.45	64.52	49.52	59.02	40.51	48.56	50.18	46.65	41.69	31.37	56.76	41.05	33.44	38.21	47.9
% of volume B above threshold colocalized	0	0	0	0	0	0	0	0	0	0	0	28.78	22.86	27.8	18.75	20.24	45.21	61.19	56.5	58.43	49.38	29.67	24.27	30.92	21.63	33.52	35.71	33.78	27.98	25.8	25.03	32.77	33.77	43.41	33.55	26.32	50.33	73.04	34.62	46.37	50.72	54.47	42.33	36.57	33.37	24.45	12.43	17.6	23.52
% of material A above threshold colocalized	0	0	0	0	0	0	0	0	0	0	0	35.55	25.01	37.93	20.56	13.92	58.68	45.89	55.71	72.94	68.73	57.43	51.59	68.11	72.18	60.56	66.57	70.25	56.93	48.16	52.08	65.65	24.25	87.59	73.39	75.61	59.48	68.56	41.43	55.22	56.68	54.05	45.15	35.52	58.5	44.94	35.68	42.4	51.6
% of material B above threshold colocalized	0	0	0	0	0	0	0	0	0	0	0	28.74	22.89	28.14	17.22	22.64	51.57	66.68	60.78	64.38	52.39	30.06	25.37	32.93	23.28	35.21	36.96	35.57	28.99	25.75	25.09	36.88	35.81	49.57	38.27	32.15	53.07	76.41	36.56	47.03	50.64	52.27	40.93	35.43	33.93	23.93	11.86	17.91	23.3
% of ROI material A colocalized	0	0	0	0	0	0	0	0	0	0	0	28.31	20.57	31.16	15.96	8.42	44.72	37.68	46.47	60.12	55.63	31.73	37.24	51.75	49.41	45.99	50.96	52.6	40.36	33.74	37.23	30.64	16.86	55.7	39.82	40.04	48.85	61.05	30.23	44.15	48.81	47.36	37.51	27.44	46.06	31.99	22.58	27.35	34.79
% of ROI material B colocalized	0	0	0	0	0	0	0	0	0	0	0	19.07	15.81	14.89	6.86	3.25	22.73	26.5	29.29	32.07	26.39	10.57	16.39	22.67	16.93	20.54	21.02	21.79	16.71	14.13	14.95	10.28	11.1	23.49	14.16	13.01	24.17	38.11	18.15	23.73	28.08	28	20.4	16.31	20.9	13.3	6.74	10.22	12.57
Pearson's coefficient in dataset volume	0.3352	0.3213	0.3141	0.2971	0.3116	0.3118	0.3181	0.3139	0.3087	0.3017	0.2317	0.3063	0.3099	0.3055	0.3024	0.3022	0.3067	0.3082	0.3026	0.2977	0.3076	0.2999	0.2914	0.2874	0.3011	0.299	0.2938	0.2924	0.3039	0.304	0.2909	0.3031	0.2974	0.2971	0.2996	0.2981	0.2941	0.2903	0.2896	0.2987	0.2993	0.3053	0.305	0.3102	0.3005	0.2925	0.2994	0.2968	0.3056
Pearson's coefficient in ROI volume	0	0	0	0	0	0	0	0	0	0	0	0.0207	-0.1063	0.1929	0.0564	0.1535	0.4632	0.4447	0.4796	0.5766	0.4835	0.3279	0.1447	0.2974	0.2867	0.3502	0.3721	0.3947	0.297	0.1979	0.2273	0.5554	0.2796	0.6705	0.5417	0.5881	0.555	0.688	0.2908	0.4143	0.4144	0.3756	0.3281	0.2917	0.3137	0.2091	0.1135	0.187	0.2499
Pearson's coefficient in colocalized volume	0	0	0	0	0	0	0	0	0	0	0	-0.0721	0.2299	-0.2952	-0.1212	0.0015	0.3498	0.1187	0.2668	0.1468	0.1838	0.1208	-0.0123	0.1665	0.2419	0.0334	-0.004	0.2324	0.0953	0.008	-0.1362	0.6263	0.3375	0.5827	0.2555	0.7461	0.2768	0.4233	0.1481	0.1415	0.1234	-0.0781	0.0326	-0.0951	-0.0918	-0.157	-0.3203	0.1223	-0.082
original Mander's coefficient A	0.9672	0.9664	0.9665	0.9656	0.966	0.9647	0.9664	0.9657	0.9649	0.9657	0.9585	0.9661	0.9628	0.966	0.9647	0.9661	0.9661	0.9663	0.9659	0.9659	0.964	0.9658	0.9679	0.9687	0.9677	0.9661	0.9663	0.9674	0.9663	0.9662	0.9674	0.9641	0.9654	0.9651	0.9639	0.9644	0.9647	0.9635	0.9606	0.9609	0.9629	0.9597	0.9592	0.9579	0.9615	0.9602	0.9622	0.9613	0.9605
original Mander's coefficient B	0.9304	0.9254	0.9235	0.9194	0.9218	0.9214	0.9188	0.928	0.9295	0.9225	0.9196	0.9217	0.9232	0.9228	0.9237	0.9165	0.9161	0.9173	0.9195	0.9164	0.9178	0.9119	0.9105	0.9074	0.9132	0.9092	0.9093	0.9059	0.9109	0.9147	0.9074	0.9088	0.9083	0.9063	0.9076	0.9062	0.9048	0.9026	0.9067	0.9089	0.9064	0.9069	0.9087	0.9023	0.9034	0.9058	0.9015	0.8981	0.8985
thresholded Mander's coefficient A	0	0	0	0	0	0	0	0	0	0	0	0.0001	0.0002	0.0003	0.0001	0.0001	0.0007	0.0007	0.0009	0.0008	0.0008	0.0002	0.0007	0.0013	0.0009	0.0015	0.0014	0.0017	0.0012	0.0009	0.001	0.0002	0.0002	0.0004	0.0002	0.0002	0.0009	0.0015	0.0005	0.001	0.0015	0.0018	0.0014	0.0009	0.0013	0.0009	0.0006	0.0007	0.0009
thresholded Mander's coefficient B	0	0	0	0	0	0	0	0	0	0	0	0.0001	0.0002	0.0002	0.0001	0.0001	0.0006	0.0007	0.0007	0.0005	0.0005	0.0002	0.0006	0.0009	0.0006	0.0012	0.0009	0.0011	0.0009	0.0007	0.0007	0.0001	0.0002	0.0003	0.0002	0.0001	0.0005	0.0009	0.0005	0.0007	0.0011	0.0013	0.0011	0.0009	0.001	0.0007	0.0005	0.0006	0.0007
One frame of real-time imaging and analysis of VE-cadherin colocalizaiton with surface junctional marker CD31 (arrowhead)
[truncated: 8 more columns]

## Sheet: Fig.2S2.F
ETP %
WT->WT	Sirpa-/-->WT
0.00309	0.0045
0.00326	0.00284
0.00379	0.00415
0.00422	0.00277
ETP #
WT->WT	Sirpa-/-->WT
3522.99	6348.69
6672.53	3097.27
7435.29	5315.85
3301.06	3132.07

## Sheet: Fig.2S2.G
Thymic Lin- donors %
WT->WT	Sirpa-/-->WT
0.0064	0.00772
0.0072	0.00783
0.00593	0.00593
Thymic Lin- donors #
WT->WT	Sirpa-/-->WT
9340	9340
13100	7440
10200	6820

## Sheet: Fig.2S2.H
Splenic Lin- donors %
WT->WT	Sirpa-/-->WT
0.094	0.075
0.12	0.12
0.097	0.098
Splenic Lin- donors #
WT->WT	Sirpa-/-->WT
110000	91500
124000	91200
108000	151000

## Sheet: Fig.2S2.I
Splenic CFSE+ donors %
WT->WT	WT->Sirpa-/-
2.25911	2.53258
2.10164	2.5499
1.87289	2.06394
2.09054	2.35049
Splenic CFSE+ donors #
WT->WT	WT->Sirpa-/-
2440000	2380000
2100000	2140000
2170000	2020000
1920000	1600000

## Sheet: Fig.2S2.J
Splenic donors #
WT	Sirpa-/-
61300	50300
47000	80800
33300	49500
