# Supplementary material for: Endothelial SIRPα signaling controls VE-cadherin endocytosis for thymic homing of progenitor cells
Source: eLife. 2022 May 5;11:e69219. doi: 10.7554/eLife.69219 (PMC9071265; doi:10.7554/eLife.69219)
Supplement: Figure 2—source data 1. [file elife-69219-fig2-data1.xlsx]

## Sheet: Fig.2.B
ETP proportion of totol thymocytes (%)
Sirpa+/-	Sirpa-/-
0.009297	0.002718
0.008471	0.002235
0.007071	0.00256
0.010115	0.003059
ETP cell number in a thymus
Sirpa+/-	Sirpa-/-
22300	4350
19000	4380
17300	4610
25100	6610

## Sheet: Fig.2.D
ETP proportion of totol thymocytes (%)
Sirpαf/f	Sirpa CKO
0.007	0.0028
0.0062	0.0033
0.0077	0.0042
0.0104	0.0039
ETP cell number in a thymus
Sirpaf/f	Sirpa CKO
16265.9	6886.23
15337.6	7955.06
27256.2	8696.05
26720	7777

## Sheet: Fig.2.F
ETP proportion of totol thymocytes (%)
WT->WT	WT->Sirpa-/-
0.0028	0.0003
0.0019	0.001
0.0017	0.0009
0.0032	0.0005
ETP cell number in a thymus
WT->WT	WT->Sirpa-/-
2590	134
1880	642
939	312
1770	452

## Sheet: Fig.2.H
Lineage- CFSE+ %
WT->WT	WT->Sirpa-/-
0.000774	0.000282
0.000572	0.000387
0.000502	0.000481
0.00081	0.000243
Lineage- CFSE+ #
WT->WT	WT->Sirpa-/-
340	220
446	263
402	270
535	247

## Sheet: Fig.2.I
CD45.1+ cell number in the thymus (48 hours)
WT	Sirpa-/-
1287	751
1246	1143
1607	796

## Sheet: Fig.2.J
CD45.1+ derived cell subsets in the thymus (3 weeks)
	WT			Sirpa-/-
DN1	2910	1950	3590	581	1190	2540
DN2	1940	344	2660	3360	1280	1750
DN3	10800	6420	11100	2070	3910	6820
DN4	13600	11900	17000	1230	4850	5760
DP	1240000	1220000	1430000	42100	792000	470000
CD4 SP	20400	14700	36900	3610	16300	8670
CD8 SP	12500	5270	8280	1100	3060	5180

## Sheet: Fig.2.K
CD45.1+ cell number in the thymus (3 weeks)
WT	Sirpa-/-
1330000	58200
1280000	837000
1540000	512000
