# Supplementary material for: Endothelial SIRPα signaling controls VE-cadherin endocytosis for thymic homing of progenitor cells
Source: eLife. 2022 May 5;11:e69219. doi: 10.7554/eLife.69219 (PMC9071265; doi:10.7554/eLife.69219)
Supplement: Figure 3—figure supplement 1—source data 1. [file elife-69219-fig3-figsupp1-data1.xlsx]

## Sheet: Fig.3S1.B,C
Proportion of ECs in total thymocytes (%)
Sirpa+/-	Sirpa-/-
0.00585	0.00157
0.00544	0.00858
0.00916	0.00677
0.0062
Cell number of total ECs
Sirpa+/-	Sirpa-/-
10800	4500
10100	17700
19100	11600
16000
Supplymentary Fig.6 Panel D,E (Reciprocally labeling)
CD47KOEC_Coloc_hIg-T (PE)
time frame	1	2	3	4	5	6	7	8	9	10	11	12	13	14	15	16	17	18	19	20	21	22	23	24	25	26	27	28	29	30	31	32	33	34	35	36	37	38	39	40	41	42	43	44	45	46	47	48	49
threshold A	639.84	639.84	639.84	639.84	639.84	639.84	639.84	639.84	639.84	639.84	639.84	639.84	639.84	639.84	639.84	639.84	639.84	639.84	639.84	639.84	639.84	639.84	639.84	639.84	639.84	639.84	639.84	639.84	639.84	639.84	639.84	639.84	639.84	639.84	639.84	639.84	639.84	639.84	639.84	639.84	639.84	639.84	639.84	639.84	639.84	639.84	639.84	639.84	639.84
threshold B	1391.66	1391.66	1391.66	1391.66	1391.66	1391.66	1391.66	1391.66	1391.66	1391.66	1391.66	1391.66	1391.66	1391.66	1391.66	1391.66	1391.66	1391.66	1391.66	1391.66	1391.66	1391.66	1391.66	1391.66	1391.66	1391.66	1391.66	1391.66	1391.66	1391.66	1391.66	1391.66	1391.66	1391.66	1391.66	1391.66	1391.66	1391.66	1391.66	1391.66	1391.66	1391.66	1391.66	1391.66	1391.66	1391.66	1391.66	1391.66	1391.66
number of colocalized voxels	0	0	0	0	0	0	0	0	0	0	0	0	0	0	177	213	342	259	325	267	416	456	422	370	419	403	391	256	335	321	320	156	149	177	161	175	279	289	396	315	529	320	436	360	306	292	343	330	230
% of dataset colocalized	0	0	0	0	0	0	0	0	0	0	0	0	0	0	0.02	0.02	0.03	0.02	0.03	0.03	0.04	0.04	0.04	0.04	0.04	0.04	0.04	0.02	0.03	0.03	0.03	0.01	0.01	0.02	0.02	0.02	0.03	0.03	0.04	0.03	0.05	0.03	0.04	0.03	0.03	0.03	0.03	0.03	0.02
% of ROI colocalized	0	0	0	0	0	0	0	0	0	0	0	0	0	0	10.25	10.17	17.07	6.84	6.58	6.25	7.84	8.05	7.92	6.95	8.07	7.73	6.81	5.26	7.01	7.12	8.09	8.62	8.83	10.83	10.08	12.78	8.57	5.82	6.66	4.45	6.86	3.74	4.82	4.17	3.53	3.34	4.2	4.32	2.9
% of volume A above threshold colocalized	0	0	0	0	0	0	0	0	0	0	0	0	0	0	59	59.33	77.55	34.63	37.75	39.67	40.08	37.69	40.11	34.01	38.33	37.45	34.45	29.66	33.63	27.79	33.54	40.1	40.16	44.58	39.08	44.08	40.97	40.03	42.22	32.85	47.36	28.57	38.82	34.16	31.19	28.13	34.54	32.01	27.38
% of volume B above threshold colocalized	0	0	0	0	0	0	0	0	0	0	0	0	0	0	29.8	22.05	33.17	26.32	23.07	22.78	31.09	38.45	36.92	32.31	37.58	41.21	32.18	27.74	34.08	42.97	46.78	34.36	36.17	37.9	39.36	46.3	48.27	35.2	35.23	31.16	34.31	25.81	28.93	26.91	20.87	22.51	26.16	26.15	18.33
% of material A above threshold colocalized	0	0	0	0	0	0	0	0	0	0	0	0	0	0	60.69	55.93	81.01	42.27	40.65	41.27	44.16	44.57	46.95	37.51	45.32	42.91	42.1	34.73	37.41	32.75	39.06	43.08	45.91	42.03	40.29	47.21	49.6	47.56	52.93	40.08	54.82	36.17	47.57	39.38	33.63	31.38	37.14	37.29	31.42
% of material B above threshold colocalized	0	0	0	0	0	0	0	0	0	0	0	0	0	0	32.28	24.06	38.31	28.33	26.17	24.29	33.76	40.55	40.26	35.28	41.68	43.91	34.23	29.03	36.29	44.91	49.32	37.61	41.49	40.81	42.53	51.06	51.54	39.97	38.37	36.15	36.86	29.4	32.14	30.17	23.66	24.64	28.26	28.05	20.37
% of ROI material A colocalized	0	0	0	0	0	0	0	0	0	0	0	0	0	0	39.03	36.69	59.47	27.38	26.4	27.04	31.73	33.15	34.86	27.46	34	31.97	30.43	24.6	27.7	25.53	29.93	32.21	35.42	33.98	33.03	38.78	37.27	32.02	35.04	25.6	37.16	23.1	30.11	24.57	20.53	19.76	23.71	24.77	18.56
% of ROI material B colocalized	0	0	0	0	0	0	0	0	0	0	0	0	0	0	19.7	16.5	28.76	15.82	15.8	14.12	19.29	21.25	21.09	18.12	21.49	21.37	17.87	13.41	17.57	19.56	22.62	17.63	19.1	20.53	20.32	26.33	22.83	15.87	19.76	14.56	19.15	12.71	15.15	13.7	10.86	9.93	12.34	12.2	9.08
Pearson's coefficient in dataset volume	0.3352	0.3213	0.3141	0.2971	0.3116	0.3118	0.3181	0.3139	0.3087	0.3017	0.2317	0.3063	0.3099	0.3055	0.3024	0.3022	0.3067	0.3082	0.3026	0.2977	0.3076	0.2999	0.2914	0.2874	0.3011	0.299	0.2938	0.2924	0.3039	0.304	0.2909	0.3031	0.2974	0.2971	0.2996	0.2981	0.2941	0.2903	0.2896	0.2987	0.2993	0.3053	0.305	0.3102	0.3005	0.2925	0.2994	0.2968	0.3056
Pearson's coefficient in ROI volume	0	0	0	0	0	0	0	0	0	0	0	0	0	0	0.2545	0.1639	0.3753	0.1604	0.1605	0.1761	0.2552	0.3077	0.3264	0.2396	0.3162	0.3068	0.2672	0.199	0.2437	0.2901	0.3478	0.274	0.3706	0.2493	0.2843	0.3354	0.4022	0.3865	0.3774	0.3287	0.3453	0.2848	0.3501	0.3232	0.2196	0.2014	0.2559	0.2552	0.2249
Pearson's coefficient in colocalized volume	0	0	0	0	0	0	0	0	0	0	0	0	0	0	-0.2112	0.0044	0.0511	0.0952	0.0968	0.0078	0.1518	0.1137	0.0947	0.049	0.0542	0.1435	0.1894	-0.0026	0.1991	0.2257	0.2345	0.4335	0.4857	0.548	0.468	0.3335	0.4024	0.5291	0.4047	0.5483	0.3415	0.4625	0.4492	0.5375	0.4015	0.073	0.3863	0.2586	0.3621
original Mander's coefficient A	0.9672	0.9664	0.9665	0.9656	0.966	0.9647	0.9664	0.9657	0.9649	0.9657	0.9585	0.9661	0.9628	0.966	0.9647	0.9661	0.9661	0.9663	0.9659	0.9659	0.964	0.9658	0.9679	0.9687	0.9677	0.9661	0.9663	0.9674	0.9663	0.9662	0.9674	0.9641	0.9654	0.9651	0.9639	0.9644	0.9647	0.9635	0.9606	0.9609	0.9629	0.9597	0.9592	0.9579	0.9615	0.9602	0.9622	0.9613	0.9605
original Mander's coefficient B	0.9304	0.9254	0.9235	0.9194	0.9218	0.9214	0.9188	0.928	0.9295	0.9225	0.9196	0.9217	0.9232	0.9228	0.9237	0.9165	0.9161	0.9173	0.9195	0.9164	0.9178	0.9119	0.9105	0.9074	0.9132	0.9092	0.9093	0.9059	0.9109	0.9147	0.9074	0.9088	0.9083	0.9063	0.9076	0.9062	0.9048	0.9026	0.9067	0.9089	0.9064	0.9069	0.9087	0.9023	0.9034	0.9058	0.9015	0.8981	0.8985
thresholded Mander's coefficient A	0	0	0	0	0	0	0	0	0	0	0	0	0	0	0.0006	0.0008	0.0013	0.0011	0.0013	0.0011	0.0017	0.002	0.0019	0.0016	0.0019	0.0017	0.0018	0.0012	0.0014	0.0014	0.0014	0.0006	0.0007	0.0007	0.0008	0.0008	0.0013	0.0014	0.0019	0.0014	0.0025	0.0016	0.0021	0.0017	0.0015	0.0014	0.0016	0.0017	0.0012
thresholded Mander's coefficient B	0	0	0	0	0	0	0	0	0	0	0	0	0	0	0.0006	0.0007	0.0012	0.001	0.0014	0.0011	0.0017	0.0018	0.0015	0.0014	0.0016	0.0015	0.0015	0.001	0.0013	0.0013	0.0012	0.0006	0.0006	0.0006	0.0006	0.0007	0.001	0.0011	0.0016	0.0014	0.0019	0.0015	0.0018	0.0016	0.0013	0.0013	0.0014	0.0014	0.0011
CD47KOEC_Coloc_CV1-T (V450)
time frame	1	2	3	4	5	6	7	8	9	10	11	12	13	14	15	16	17	18	19	20	21	22	23	24	25	26	27	28	29	30	31	32	33	34	35	36	37	38	39	40	41	42	43	44	45	46	47	48	49
threshold A	639.84	639.84	639.84	639.84	639.84	639.84	639.84	639.84	639.84	639.84	639.84	639.84	639.84	639.84	639.84	639.84	639.84	639.84	639.84	639.84	639.84	639.84	639.84	639.84	639.84	639.84	639.84	639.84	639.84	639.84	639.84	639.84	639.84	639.84	639.84	639.84	639.84	639.84	639.84	639.84	639.84	639.84	639.84	639.84	639.84	639.84	639.84	639.84	639.84
threshold B	1391.66	1391.66	1391.66	1391.66	1391.66	1391.66	1391.66	1391.66	1391.66	1391.66	1391.66	1391.66	1391.66	1391.66	1391.66	1391.66	1391.66	1391.66	1391.66	1391.66	1391.66	1391.66	1391.66	1391.66	1391.66	1391.66	1391.66	1391.66	1391.66	1391.66	1391.66	1391.66	1391.66	1391.66	1391.66	1391.66	1391.66	1391.66	1391.66	1391.66	1391.66	1391.66	1391.66	1391.66	1391.66	1391.66	1391.66	1391.66	1391.66
number of colocalized voxels	0	0	0	0	0	0	0	0	0	0	0	40	48	57	27	17	165	175	200	156	158	54	174	299	204	358	320	382	289	227	212	39	52	89	51	40	154	252	126	185	281	341	276	181	277	188	105	141	194
% of dataset colocalized	0	0	0	0	0	0	0	0	0	0	0	0	0	0.01	0	0	0.02	0.02	0.02	0.01	0.02	0.01	0.02	0.03	0.02	0.03	0.03	0.04	0.03	0.02	0.02	0	0	0.01	0	0	0.01	0.02	0.01	0.02	0.03	0.03	0.03	0.02	0.03	0.02	0.01	0.01	0.02
% of ROI colocalized	0	0	0	0	0	0	0	0	0	0	0	10.67	9.28	6.51	2.9	1.01	8.21	8.74	11.74	13.53	12.04	3.65	8.45	12.38	9.57	9.22	9.22	10.06	7.22	6.18	6.49	2.96	3.78	7.35	3.86	3.48	9.57	14.17	6.42	8.87	12.11	13.16	8.94	5.78	8.66	5.59	3.02	3.95	5.07
% of volume A above threshold colocalized	0	0	0	0	0	0	0	0	0	0	0	42.55	33.33	40.71	22.31	13.82	55.74	46.05	52.08	65.55	59.4	45	51.63	64.86	68.46	57.19	61.42	62.93	54.94	46.04	45.79	54.93	27.81	79.46	61.45	64.52	49.52	59.02	40.51	48.56	50.18	46.65	41.69	31.37	56.76	41.05	33.44	38.21	47.9
% of volume B above threshold colocalized	0	0	0	0	0	0	0	0	0	0	0	28.78	22.86	27.8	18.75	20.24	45.21	61.19	56.5	58.43	49.38	29.67	24.27	30.92	21.63	33.52	35.71	33.78	27.98	25.8	25.03	32.77	33.77	43.41	33.55	26.32	50.33	73.04	34.62	46.37	50.72	54.47	42.33	36.57	33.37	24.45	12.43	17.6	23.52
% of material A above threshold colocalized	0	0	0	0	0	0	0	0	0	0	0	35.55	25.01	37.93	20.56	13.92	58.68	45.89	55.71	72.94	68.73	57.43	51.59	68.11	72.18	60.56	66.57	70.25	56.93	48.16	52.08	65.65	24.25	87.59	73.39	75.61	59.48	68.56	41.43	55.22	56.68	54.05	45.15	35.52	58.5	44.94	35.68	42.4	51.6
% of material B above threshold colocalized	0	0	0	0	0	0	0	0	0	0	0	28.74	22.89	28.14	17.22	22.64	51.57	66.68	60.78	64.38	52.39	30.06	25.37	32.93	23.28	35.21	36.96	35.57	28.99	25.75	25.09	36.88	35.81	49.57	38.27	32.15	53.07	76.41	36.56	47.03	50.64	52.27	40.93	35.43	33.93	23.93	11.86	17.91	23.3
% of ROI material A colocalized	0	0	0	0	0	0	0	0	0	0	0	28.31	20.57	31.16	15.96	8.42	44.72	37.68	46.47	60.12	55.63	31.73	37.24	51.75	49.41	45.99	50.96	52.6	40.36	33.74	37.23	30.64	16.86	55.7	39.82	40.04	48.85	61.05	30.23	44.15	48.81	47.36	37.51	27.44	46.06	31.99	22.58	27.35	34.79
% of ROI material B colocalized	0	0	0	0	0	0	0	0	0	0	0	19.07	15.81	14.89	6.86	3.25	22.73	26.5	29.29	32.07	26.39	10.57	16.39	22.67	16.93	20.54	21.02	21.79	16.71	14.13	14.95	10.28	11.1	23.49	14.16	13.01	24.17	38.11	18.15	23.73	28.08	28	20.4	16.31	20.9	13.3	6.74	10.22	12.57
Pearson's coefficient in dataset volume	0.3352	0.3213	0.3141	0.2971	0.3116	0.3118	0.3181	0.3139	0.3087	0.3017	0.2317	0.3063	0.3099	0.3055	0.3024	0.3022	0.3067	0.3082	0.3026	0.2977	0.3076	0.2999	0.2914	0.2874	0.3011	0.299	0.2938	0.2924	0.3039	0.304	0.2909	0.3031	0.2974	0.2971	0.2996	0.2981	0.2941	0.2903	0.2896	0.2987	0.2993	0.3053	0.305	0.3102	0.3005	0.2925	0.2994	0.2968	0.3056
Pearson's coefficient in ROI volume	0	0	0	0	0	0	0	0	0	0	0	0.0207	-0.1063	0.1929	0.0564	0.1535	0.4632	0.4447	0.4796	0.5766	0.4835	0.3279	0.1447	0.2974	0.2867	0.3502	0.3721	0.3947	0.297	0.1979	0.2273	0.5554	0.2796	0.6705	0.5417	0.5881	0.555	0.688	0.2908	0.4143	0.4144	0.3756	0.3281	0.2917	0.3137	0.2091	0.1135	0.187	0.2499
Pearson's coefficient in colocalized volume	0	0	0	0	0	0	0	0	0	0	0	-0.0721	0.2299	-0.2952	-0.1212	0.0015	0.3498	0.1187	0.2668	0.1468	0.1838	0.1208	-0.0123	0.1665	0.2419	0.0334	-0.004	0.2324	0.0953	0.008	-0.1362	0.6263	0.3375	0.5827	0.2555	0.7461	0.2768	0.4233	0.1481	0.1415	0.1234	-0.0781	0.0326	-0.0951	-0.0918	-0.157	-0.3203	0.1223	-0.082
original Mander's coefficient A	0.9672	0.9664	0.9665	0.9656	0.966	0.9647	0.9664	0.9657	0.9649	0.9657	0.9585	0.9661	0.9628	0.966	0.9647	0.9661	0.9661	0.9663	0.9659	0.9659	0.964	0.9658	0.9679	0.9687	0.9677	0.9661	0.9663	0.9674	0.9663	0.9662	0.9674	0.9641	0.9654	0.9651	0.9639	0.9644	0.9647	0.9635	0.9606	0.9609	0.9629	0.9597	0.9592	0.9579	0.9615	0.9602	0.9622	0.9613	0.9605
original Mander's coefficient B	0.9304	0.9254	0.9235	0.9194	0.9218	0.9214	0.9188	0.928	0.9295	0.9225	0.9196	0.9217	0.9232	0.9228	0.9237	0.9165	0.9161	0.9173	0.9195	0.9164	0.9178	0.9119	0.9105	0.9074	0.9132	0.9092	0.9093	0.9059	0.9109	0.9147	0.9074	0.9088	0.9083	0.9063	0.9076	0.9062	0.9048	0.9026	0.9067	0.9089	0.9064	0.9069	0.9087	0.9023	0.9034	0.9058	0.9015	0.8981	0.8985
thresholded Mander's coefficient A	0	0	0	0	0	0	0	0	0	0	0	0.0001	0.0002	0.0003	0.0001	0.0001	0.0007	0.0007	0.0009	0.0008	0.0008	0.0002	0.0007	0.0013	0.0009	0.0015	0.0014	0.0017	0.0012	0.0009	0.001	0.0002	0.0002	0.0004	0.0002	0.0002	0.0009	0.0015	0.0005	0.001	0.0015	0.0018	0.0014	0.0009	0.0013	0.0009	0.0006	0.0007	0.0009
thresholded Mander's coefficient B	0	0	0	0	0	0	0	0	0	0	0	0.0001	0.0002	0.0002	0.0001	0.0001	0.0006	0.0007	0.0007	0.0005	0.0005	0.0002	0.0006	0.0009	0.0006	0.0012	0.0009	0.0011	0.0009	0.0007	0.0007	0.0001	0.0002	0.0003	0.0002	0.0001	0.0005	0.0009	0.0005	0.0007	0.0011	0.0013	0.0011	0.0009	0.001	0.0007	0.0005	0.0006	0.0007
One frame of real-time imaging and analysis of VE-cadherin colocalizaiton with surface junctional marker CD31 (arrowhead)
[truncated: 8 more columns]

## Sheet: Fig.3S1.D
Relative Ccl25 expression
WT	Sirpa-/-
0.3872	0.2999
2.0318	3.118
0.9322	0.9302
Relative Ccl19 expression
0.2509	2.4633
1.2021	7.6462
5.4579	0.2295
Relative Ccl21a expression
0.3479	0.2266
0.3078	0.123
0.4137	0.2191

## Sheet: Fig.3S1.F
Adhered lymphocytes
WT	Sirpa-/-	Sirpa-ΔICD
5727	6229	6452
4482	6245	5694
3907	4142	4996

## Sheet: Fig.3S1.G
MS1 cell number
	WT			Sirpa-/-
DAY0	10000	10000	10000	10000	10000	10000
DAY1	21776.1	23263.9	20292.5	29383.9	34219.6	29322.3
DAY2	44346.5	55418.8	57408.8	111479	111479	60763.3
DAY3	161968	127052	159263	131222	114880	146811
DAY4	117934	101810	162722	131240	97096.9	131318

## Sheet: Fig.3S1.I
Relative TEM
WT	Sirpa-/-
0.856161	0.548423
1.02648	0.565394
1.12031	0.563591
