# Supplementary material for: Endothelial SIRPα signaling controls VE-cadherin endocytosis for thymic homing of progenitor cells
Source: eLife. 2022 May 5;11:e69219. doi: 10.7554/eLife.69219 (PMC9071265; doi:10.7554/eLife.69219)
Supplement: Figure 3—source data 1. [file elife-69219-fig3-data1.xlsx]

## Sheet: Fig.3.B,C
Proportion of EC subsets (%) in thymic endothelial cells
	Sirpa+/-				Sirpa-/-
I	70.98	73.91	69.25	70.94	75.35	63.25	62.94
II	10.75	10.51	10.31	8.82	7.02	12.4	12.38
TPEC	10.18	7.51	8.46	10.63	8.73	15.27	15.9
Cell number of EC subsets
	Sirpa+/-				Sirpa-/-
I	7630	7470	13200	11300	3390	11200	7330
II	1160	1060	1960	1410	316	2190	1440
TPEC	1090	759	1610	1700	393	2700	1850
Supplymentary Fig.6 Panel D,E (Reciprocally labeling)
CD47KOEC_Coloc_hIg-T (PE)
time frame	1	2	3	4	5	6	7	8	9	10	11	12	13	14	15	16	17	18	19	20	21	22	23	24	25	26	27	28	29	30	31	32	33	34	35	36	37	38	39	40	41	42	43	44	45	46	47	48	49
threshold A	639.84	639.84	639.84	639.84	639.84	639.84	639.84	639.84	639.84	639.84	639.84	639.84	639.84	639.84	639.84	639.84	639.84	639.84	639.84	639.84	639.84	639.84	639.84	639.84	639.84	639.84	639.84	639.84	639.84	639.84	639.84	639.84	639.84	639.84	639.84	639.84	639.84	639.84	639.84	639.84	639.84	639.84	639.84	639.84	639.84	639.84	639.84	639.84	639.84
threshold B	1391.66	1391.66	1391.66	1391.66	1391.66	1391.66	1391.66	1391.66	1391.66	1391.66	1391.66	1391.66	1391.66	1391.66	1391.66	1391.66	1391.66	1391.66	1391.66	1391.66	1391.66	1391.66	1391.66	1391.66	1391.66	1391.66	1391.66	1391.66	1391.66	1391.66	1391.66	1391.66	1391.66	1391.66	1391.66	1391.66	1391.66	1391.66	1391.66	1391.66	1391.66	1391.66	1391.66	1391.66	1391.66	1391.66	1391.66	1391.66	1391.66
number of colocalized voxels	0	0	0	0	0	0	0	0	0	0	0	0	0	0	177	213	342	259	325	267	416	456	422	370	419	403	391	256	335	321	320	156	149	177	161	175	279	289	396	315	529	320	436	360	306	292	343	330	230
% of dataset colocalized	0	0	0	0	0	0	0	0	0	0	0	0	0	0	0.02	0.02	0.03	0.02	0.03	0.03	0.04	0.04	0.04	0.04	0.04	0.04	0.04	0.02	0.03	0.03	0.03	0.01	0.01	0.02	0.02	0.02	0.03	0.03	0.04	0.03	0.05	0.03	0.04	0.03	0.03	0.03	0.03	0.03	0.02
% of ROI colocalized	0	0	0	0	0	0	0	0	0	0	0	0	0	0	10.25	10.17	17.07	6.84	6.58	6.25	7.84	8.05	7.92	6.95	8.07	7.73	6.81	5.26	7.01	7.12	8.09	8.62	8.83	10.83	10.08	12.78	8.57	5.82	6.66	4.45	6.86	3.74	4.82	4.17	3.53	3.34	4.2	4.32	2.9
% of volume A above threshold colocalized	0	0	0	0	0	0	0	0	0	0	0	0	0	0	59	59.33	77.55	34.63	37.75	39.67	40.08	37.69	40.11	34.01	38.33	37.45	34.45	29.66	33.63	27.79	33.54	40.1	40.16	44.58	39.08	44.08	40.97	40.03	42.22	32.85	47.36	28.57	38.82	34.16	31.19	28.13	34.54	32.01	27.38
% of volume B above threshold colocalized	0	0	0	0	0	0	0	0	0	0	0	0	0	0	29.8	22.05	33.17	26.32	23.07	22.78	31.09	38.45	36.92	32.31	37.58	41.21	32.18	27.74	34.08	42.97	46.78	34.36	36.17	37.9	39.36	46.3	48.27	35.2	35.23	31.16	34.31	25.81	28.93	26.91	20.87	22.51	26.16	26.15	18.33
% of material A above threshold colocalized	0	0	0	0	0	0	0	0	0	0	0	0	0	0	60.69	55.93	81.01	42.27	40.65	41.27	44.16	44.57	46.95	37.51	45.32	42.91	42.1	34.73	37.41	32.75	39.06	43.08	45.91	42.03	40.29	47.21	49.6	47.56	52.93	40.08	54.82	36.17	47.57	39.38	33.63	31.38	37.14	37.29	31.42
% of material B above threshold colocalized	0	0	0	0	0	0	0	0	0	0	0	0	0	0	32.28	24.06	38.31	28.33	26.17	24.29	33.76	40.55	40.26	35.28	41.68	43.91	34.23	29.03	36.29	44.91	49.32	37.61	41.49	40.81	42.53	51.06	51.54	39.97	38.37	36.15	36.86	29.4	32.14	30.17	23.66	24.64	28.26	28.05	20.37
% of ROI material A colocalized	0	0	0	0	0	0	0	0	0	0	0	0	0	0	39.03	36.69	59.47	27.38	26.4	27.04	31.73	33.15	34.86	27.46	34	31.97	30.43	24.6	27.7	25.53	29.93	32.21	35.42	33.98	33.03	38.78	37.27	32.02	35.04	25.6	37.16	23.1	30.11	24.57	20.53	19.76	23.71	24.77	18.56
% of ROI material B colocalized	0	0	0	0	0	0	0	0	0	0	0	0	0	0	19.7	16.5	28.76	15.82	15.8	14.12	19.29	21.25	21.09	18.12	21.49	21.37	17.87	13.41	17.57	19.56	22.62	17.63	19.1	20.53	20.32	26.33	22.83	15.87	19.76	14.56	19.15	12.71	15.15	13.7	10.86	9.93	12.34	12.2	9.08
Pearson's coefficient in dataset volume	0.3352	0.3213	0.3141	0.2971	0.3116	0.3118	0.3181	0.3139	0.3087	0.3017	0.2317	0.3063	0.3099	0.3055	0.3024	0.3022	0.3067	0.3082	0.3026	0.2977	0.3076	0.2999	0.2914	0.2874	0.3011	0.299	0.2938	0.2924	0.3039	0.304	0.2909	0.3031	0.2974	0.2971	0.2996	0.2981	0.2941	0.2903	0.2896	0.2987	0.2993	0.3053	0.305	0.3102	0.3005	0.2925	0.2994	0.2968	0.3056
Pearson's coefficient in ROI volume	0	0	0	0	0	0	0	0	0	0	0	0	0	0	0.2545	0.1639	0.3753	0.1604	0.1605	0.1761	0.2552	0.3077	0.3264	0.2396	0.3162	0.3068	0.2672	0.199	0.2437	0.2901	0.3478	0.274	0.3706	0.2493	0.2843	0.3354	0.4022	0.3865	0.3774	0.3287	0.3453	0.2848	0.3501	0.3232	0.2196	0.2014	0.2559	0.2552	0.2249
Pearson's coefficient in colocalized volume	0	0	0	0	0	0	0	0	0	0	0	0	0	0	-0.2112	0.0044	0.0511	0.0952	0.0968	0.0078	0.1518	0.1137	0.0947	0.049	0.0542	0.1435	0.1894	-0.0026	0.1991	0.2257	0.2345	0.4335	0.4857	0.548	0.468	0.3335	0.4024	0.5291	0.4047	0.5483	0.3415	0.4625	0.4492	0.5375	0.4015	0.073	0.3863	0.2586	0.3621
original Mander's coefficient A	0.9672	0.9664	0.9665	0.9656	0.966	0.9647	0.9664	0.9657	0.9649	0.9657	0.9585	0.9661	0.9628	0.966	0.9647	0.9661	0.9661	0.9663	0.9659	0.9659	0.964	0.9658	0.9679	0.9687	0.9677	0.9661	0.9663	0.9674	0.9663	0.9662	0.9674	0.9641	0.9654	0.9651	0.9639	0.9644	0.9647	0.9635	0.9606	0.9609	0.9629	0.9597	0.9592	0.9579	0.9615	0.9602	0.9622	0.9613	0.9605
original Mander's coefficient B	0.9304	0.9254	0.9235	0.9194	0.9218	0.9214	0.9188	0.928	0.9295	0.9225	0.9196	0.9217	0.9232	0.9228	0.9237	0.9165	0.9161	0.9173	0.9195	0.9164	0.9178	0.9119	0.9105	0.9074	0.9132	0.9092	0.9093	0.9059	0.9109	0.9147	0.9074	0.9088	0.9083	0.9063	0.9076	0.9062	0.9048	0.9026	0.9067	0.9089	0.9064	0.9069	0.9087	0.9023	0.9034	0.9058	0.9015	0.8981	0.8985
thresholded Mander's coefficient A	0	0	0	0	0	0	0	0	0	0	0	0	0	0	0.0006	0.0008	0.0013	0.0011	0.0013	0.0011	0.0017	0.002	0.0019	0.0016	0.0019	0.0017	0.0018	0.0012	0.0014	0.0014	0.0014	0.0006	0.0007	0.0007	0.0008	0.0008	0.0013	0.0014	0.0019	0.0014	0.0025	0.0016	0.0021	0.0017	0.0015	0.0014	0.0016	0.0017	0.0012
thresholded Mander's coefficient B	0	0	0	0	0	0	0	0	0	0	0	0	0	0	0.0006	0.0007	0.0012	0.001	0.0014	0.0011	0.0017	0.0018	0.0015	0.0014	0.0016	0.0015	0.0015	0.001	0.0013	0.0013	0.0012	0.0006	0.0006	0.0006	0.0006	0.0007	0.001	0.0011	0.0016	0.0014	0.0019	0.0015	0.0018	0.0016	0.0013	0.0013	0.0014	0.0014	0.0011
CD47KOEC_Coloc_CV1-T (V450)
time frame	1	2	3	4	5	6	7	8	9	10	11	12	13	14	15	16	17	18	19	20	21	22	23	24	25	26	27	28	29	30	31	32	33	34	35	36	37	38	39	40	41	42	43	44	45	46	47	48	49
threshold A	639.84	639.84	639.84	639.84	639.84	639.84	639.84	639.84	639.84	639.84	639.84	639.84	639.84	639.84	639.84	639.84	639.84	639.84	639.84	639.84	639.84	639.84	639.84	639.84	639.84	639.84	639.84	639.84	639.84	639.84	639.84	639.84	639.84	639.84	639.84	639.84	639.84	639.84	639.84	639.84	639.84	639.84	639.84	639.84	639.84	639.84	639.84	639.84	639.84
threshold B	1391.66	1391.66	1391.66	1391.66	1391.66	1391.66	1391.66	1391.66	1391.66	1391.66	1391.66	1391.66	1391.66	1391.66	1391.66	1391.66	1391.66	1391.66	1391.66	1391.66	1391.66	1391.66	1391.66	1391.66	1391.66	1391.66	1391.66	1391.66	1391.66	1391.66	1391.66	1391.66	1391.66	1391.66	1391.66	1391.66	1391.66	1391.66	1391.66	1391.66	1391.66	1391.66	1391.66	1391.66	1391.66	1391.66	1391.66	1391.66	1391.66
number of colocalized voxels	0	0	0	0	0	0	0	0	0	0	0	40	48	57	27	17	165	175	200	156	158	54	174	299	204	358	320	382	289	227	212	39	52	89	51	40	154	252	126	185	281	341	276	181	277	188	105	141	194
% of dataset colocalized	0	0	0	0	0	0	0	0	0	0	0	0	0	0.01	0	0	0.02	0.02	0.02	0.01	0.02	0.01	0.02	0.03	0.02	0.03	0.03	0.04	0.03	0.02	0.02	0	0	0.01	0	0	0.01	0.02	0.01	0.02	0.03	0.03	0.03	0.02	0.03	0.02	0.01	0.01	0.02
% of ROI colocalized	0	0	0	0	0	0	0	0	0	0	0	10.67	9.28	6.51	2.9	1.01	8.21	8.74	11.74	13.53	12.04	3.65	8.45	12.38	9.57	9.22	9.22	10.06	7.22	6.18	6.49	2.96	3.78	7.35	3.86	3.48	9.57	14.17	6.42	8.87	12.11	13.16	8.94	5.78	8.66	5.59	3.02	3.95	5.07
% of volume A above threshold colocalized	0	0	0	0	0	0	0	0	0	0	0	42.55	33.33	40.71	22.31	13.82	55.74	46.05	52.08	65.55	59.4	45	51.63	64.86	68.46	57.19	61.42	62.93	54.94	46.04	45.79	54.93	27.81	79.46	61.45	64.52	49.52	59.02	40.51	48.56	50.18	46.65	41.69	31.37	56.76	41.05	33.44	38.21	47.9
% of volume B above threshold colocalized	0	0	0	0	0	0	0	0	0	0	0	28.78	22.86	27.8	18.75	20.24	45.21	61.19	56.5	58.43	49.38	29.67	24.27	30.92	21.63	33.52	35.71	33.78	27.98	25.8	25.03	32.77	33.77	43.41	33.55	26.32	50.33	73.04	34.62	46.37	50.72	54.47	42.33	36.57	33.37	24.45	12.43	17.6	23.52
% of material A above threshold colocalized	0	0	0	0	0	0	0	0	0	0	0	35.55	25.01	37.93	20.56	13.92	58.68	45.89	55.71	72.94	68.73	57.43	51.59	68.11	72.18	60.56	66.57	70.25	56.93	48.16	52.08	65.65	24.25	87.59	73.39	75.61	59.48	68.56	41.43	55.22	56.68	54.05	45.15	35.52	58.5	44.94	35.68	42.4	51.6
% of material B above threshold colocalized	0	0	0	0	0	0	0	0	0	0	0	28.74	22.89	28.14	17.22	22.64	51.57	66.68	60.78	64.38	52.39	30.06	25.37	32.93	23.28	35.21	36.96	35.57	28.99	25.75	25.09	36.88	35.81	49.57	38.27	32.15	53.07	76.41	36.56	47.03	50.64	52.27	40.93	35.43	33.93	23.93	11.86	17.91	23.3
% of ROI material A colocalized	0	0	0	0	0	0	0	0	0	0	0	28.31	20.57	31.16	15.96	8.42	44.72	37.68	46.47	60.12	55.63	31.73	37.24	51.75	49.41	45.99	50.96	52.6	40.36	33.74	37.23	30.64	16.86	55.7	39.82	40.04	48.85	61.05	30.23	44.15	48.81	47.36	37.51	27.44	46.06	31.99	22.58	27.35	34.79
% of ROI material B colocalized	0	0	0	0	0	0	0	0	0	0	0	19.07	15.81	14.89	6.86	3.25	22.73	26.5	29.29	32.07	26.39	10.57	16.39	22.67	16.93	20.54	21.02	21.79	16.71	14.13	14.95	10.28	11.1	23.49	14.16	13.01	24.17	38.11	18.15	23.73	28.08	28	20.4	16.31	20.9	13.3	6.74	10.22	12.57
Pearson's coefficient in dataset volume	0.3352	0.3213	0.3141	0.2971	0.3116	0.3118	0.3181	0.3139	0.3087	0.3017	0.2317	0.3063	0.3099	0.3055	0.3024	0.3022	0.3067	0.3082	0.3026	0.2977	0.3076	0.2999	0.2914	0.2874	0.3011	0.299	0.2938	0.2924	0.3039	0.304	0.2909	0.3031	0.2974	0.2971	0.2996	0.2981	0.2941	0.2903	0.2896	0.2987	0.2993	0.3053	0.305	0.3102	0.3005	0.2925	0.2994	0.2968	0.3056
Pearson's coefficient in ROI volume	0	0	0	0	0	0	0	0	0	0	0	0.0207	-0.1063	0.1929	0.0564	0.1535	0.4632	0.4447	0.4796	0.5766	0.4835	0.3279	0.1447	0.2974	0.2867	0.3502	0.3721	0.3947	0.297	0.1979	0.2273	0.5554	0.2796	0.6705	0.5417	0.5881	0.555	0.688	0.2908	0.4143	0.4144	0.3756	0.3281	0.2917	0.3137	0.2091	0.1135	0.187	0.2499
Pearson's coefficient in colocalized volume	0	0	0	0	0	0	0	0	0	0	0	-0.0721	0.2299	-0.2952	-0.1212	0.0015	0.3498	0.1187	0.2668	0.1468	0.1838	0.1208	-0.0123	0.1665	0.2419	0.0334	-0.004	0.2324	0.0953	0.008	-0.1362	0.6263	0.3375	0.5827	0.2555	0.7461	0.2768	0.4233	0.1481	0.1415	0.1234	-0.0781	0.0326	-0.0951	-0.0918	-0.157	-0.3203	0.1223	-0.082
original Mander's coefficient A	0.9672	0.9664	0.9665	0.9656	0.966	0.9647	0.9664	0.9657	0.9649	0.9657	0.9585	0.9661	0.9628	0.966	0.9647	0.9661	0.9661	0.9663	0.9659	0.9659	0.964	0.9658	0.9679	0.9687	0.9677	0.9661	0.9663	0.9674	0.9663	0.9662	0.9674	0.9641	0.9654	0.9651	0.9639	0.9644	0.9647	0.9635	0.9606	0.9609	0.9629	0.9597	0.9592	0.9579	0.9615	0.9602	0.9622	0.9613	0.9605
original Mander's coefficient B	0.9304	0.9254	0.9235	0.9194	0.9218	0.9214	0.9188	0.928	0.9295	0.9225	0.9196	0.9217	0.9232	0.9228	0.9237	0.9165	0.9161	0.9173	0.9195	0.9164	0.9178	0.9119	0.9105	0.9074	0.9132	0.9092	0.9093	0.9059	0.9109	0.9147	0.9074	0.9088	0.9083	0.9063	0.9076	0.9062	0.9048	0.9026	0.9067	0.9089	0.9064	0.9069	0.9087	0.9023	0.9034	0.9058	0.9015	0.8981	0.8985
thresholded Mander's coefficient A	0	0	0	0	0	0	0	0	0	0	0	0.0001	0.0002	0.0003	0.0001	0.0001	0.0007	0.0007	0.0009	0.0008	0.0008	0.0002	0.0007	0.0013	0.0009	0.0015	0.0014	0.0017	0.0012	0.0009	0.001	0.0002	0.0002	0.0004	0.0002	0.0002	0.0009	0.0015	0.0005	0.001	0.0015	0.0018	0.0014	0.0009	0.0013	0.0009	0.0006	0.0007	0.0009
thresholded Mander's coefficient B	0	0	0	0	0	0	0	0	0	0	0	0.0001	0.0002	0.0002	0.0001	0.0001	0.0006	0.0007	0.0007	0.0005	0.0005	0.0002	0.0006	0.0009	0.0006	0.0012	0.0009	0.0011	0.0009	0.0007	0.0007	0.0001	0.0002	0.0003	0.0002	0.0001	0.0005	0.0009	0.0005	0.0007	0.0011	0.0013	0.0011	0.0009	0.001	0.0007	0.0005	0.0006	0.0007
One frame of real-time imaging and analysis of VE-cadherin colocalizaiton with surface junctional marker CD31 (arrowhead)
[truncated: 8 more columns]

## Sheet: Fig.3.D,E
P-selectin MFI
	Sirpaf/f			Sirpa CKO
I	1261	1169	1172	1404	1133	1459
II	34103	30868	32870	36196	35119	34054
TPEC	44018	43506	36108	44330	47044	40747
VCAM-1 MFI
	WT			Sirpa-/-
I	972	689	717	756	517	422
II	3780.5	4128.5	3776.5	3139.5	2655.5	2936.5
TPEC	3522	3908	3155	2390	2665	3114

## Sheet: Fig.3.F
Lin- BM TEM
WT EC	Sirpa-/- EC
210	71
177	64
196	74
