# Supplementary material for: Endothelial SIRPα signaling controls VE-cadherin endocytosis for thymic homing of progenitor cells
Source: eLife. 2022 May 5;11:e69219. doi: 10.7554/eLife.69219 (PMC9071265; doi:10.7554/eLife.69219)
Supplement: Figure 5—source data 1. [file elife-69219-fig5-data1.xlsx]

## Sheet: Fig.5.A,B,C
Relative TEM
Fig.5.A
WT	Sirpa-/-	Sirpa-ΔICD
0.867563	0.757502	0.709657
1.22578	0.584777	0.699521
0.90666	0.408971	0.607892
Fig.5.B
WT	Sirpa-/-	Sirpa-/- + Sirpa-WT	Sirpa-/- + Sirpa-Y4F
1.19441	0.26908	0.823022	0.149277
1.04589	0.347236	0.685155	0.262804
0.759698	0.339059	0.836144	0.271742
Fig.5.C
Sirpa-/-+Empty vector	Sirpa-/-+ Shp2-E76K
0.992297	1.33487
1.03078	1.11626
0.976927	1.33808
Supplymentary Fig.6 Panel D,E (Reciprocally labeling)
CD47KOEC_Coloc_hIg-T (PE)
time frame	1	2	3	4	5	6	7	8	9	10	11	12	13	14	15	16	17	18	19	20	21	22	23	24	25	26	27	28	29	30	31	32	33	34	35	36	37	38	39	40	41	42	43	44	45	46	47	48	49
threshold A	639.84	639.84	639.84	639.84	639.84	639.84	639.84	639.84	639.84	639.84	639.84	639.84	639.84	639.84	639.84	639.84	639.84	639.84	639.84	639.84	639.84	639.84	639.84	639.84	639.84	639.84	639.84	639.84	639.84	639.84	639.84	639.84	639.84	639.84	639.84	639.84	639.84	639.84	639.84	639.84	639.84	639.84	639.84	639.84	639.84	639.84	639.84	639.84	639.84
threshold B	1391.66	1391.66	1391.66	1391.66	1391.66	1391.66	1391.66	1391.66	1391.66	1391.66	1391.66	1391.66	1391.66	1391.66	1391.66	1391.66	1391.66	1391.66	1391.66	1391.66	1391.66	1391.66	1391.66	1391.66	1391.66	1391.66	1391.66	1391.66	1391.66	1391.66	1391.66	1391.66	1391.66	1391.66	1391.66	1391.66	1391.66	1391.66	1391.66	1391.66	1391.66	1391.66	1391.66	1391.66	1391.66	1391.66	1391.66	1391.66	1391.66
number of colocalized voxels	0	0	0	0	0	0	0	0	0	0	0	0	0	0	177	213	342	259	325	267	416	456	422	370	419	403	391	256	335	321	320	156	149	177	161	175	279	289	396	315	529	320	436	360	306	292	343	330	230
% of dataset colocalized	0	0	0	0	0	0	0	0	0	0	0	0	0	0	0.02	0.02	0.03	0.02	0.03	0.03	0.04	0.04	0.04	0.04	0.04	0.04	0.04	0.02	0.03	0.03	0.03	0.01	0.01	0.02	0.02	0.02	0.03	0.03	0.04	0.03	0.05	0.03	0.04	0.03	0.03	0.03	0.03	0.03	0.02
% of ROI colocalized	0	0	0	0	0	0	0	0	0	0	0	0	0	0	10.25	10.17	17.07	6.84	6.58	6.25	7.84	8.05	7.92	6.95	8.07	7.73	6.81	5.26	7.01	7.12	8.09	8.62	8.83	10.83	10.08	12.78	8.57	5.82	6.66	4.45	6.86	3.74	4.82	4.17	3.53	3.34	4.2	4.32	2.9
% of volume A above threshold colocalized	0	0	0	0	0	0	0	0	0	0	0	0	0	0	59	59.33	77.55	34.63	37.75	39.67	40.08	37.69	40.11	34.01	38.33	37.45	34.45	29.66	33.63	27.79	33.54	40.1	40.16	44.58	39.08	44.08	40.97	40.03	42.22	32.85	47.36	28.57	38.82	34.16	31.19	28.13	34.54	32.01	27.38
% of volume B above threshold colocalized	0	0	0	0	0	0	0	0	0	0	0	0	0	0	29.8	22.05	33.17	26.32	23.07	22.78	31.09	38.45	36.92	32.31	37.58	41.21	32.18	27.74	34.08	42.97	46.78	34.36	36.17	37.9	39.36	46.3	48.27	35.2	35.23	31.16	34.31	25.81	28.93	26.91	20.87	22.51	26.16	26.15	18.33
% of material A above threshold colocalized	0	0	0	0	0	0	0	0	0	0	0	0	0	0	60.69	55.93	81.01	42.27	40.65	41.27	44.16	44.57	46.95	37.51	45.32	42.91	42.1	34.73	37.41	32.75	39.06	43.08	45.91	42.03	40.29	47.21	49.6	47.56	52.93	40.08	54.82	36.17	47.57	39.38	33.63	31.38	37.14	37.29	31.42
% of material B above threshold colocalized	0	0	0	0	0	0	0	0	0	0	0	0	0	0	32.28	24.06	38.31	28.33	26.17	24.29	33.76	40.55	40.26	35.28	41.68	43.91	34.23	29.03	36.29	44.91	49.32	37.61	41.49	40.81	42.53	51.06	51.54	39.97	38.37	36.15	36.86	29.4	32.14	30.17	23.66	24.64	28.26	28.05	20.37
% of ROI material A colocalized	0	0	0	0	0	0	0	0	0	0	0	0	0	0	39.03	36.69	59.47	27.38	26.4	27.04	31.73	33.15	34.86	27.46	34	31.97	30.43	24.6	27.7	25.53	29.93	32.21	35.42	33.98	33.03	38.78	37.27	32.02	35.04	25.6	37.16	23.1	30.11	24.57	20.53	19.76	23.71	24.77	18.56
% of ROI material B colocalized	0	0	0	0	0	0	0	0	0	0	0	0	0	0	19.7	16.5	28.76	15.82	15.8	14.12	19.29	21.25	21.09	18.12	21.49	21.37	17.87	13.41	17.57	19.56	22.62	17.63	19.1	20.53	20.32	26.33	22.83	15.87	19.76	14.56	19.15	12.71	15.15	13.7	10.86	9.93	12.34	12.2	9.08
Pearson's coefficient in dataset volume	0.3352	0.3213	0.3141	0.2971	0.3116	0.3118	0.3181	0.3139	0.3087	0.3017	0.2317	0.3063	0.3099	0.3055	0.3024	0.3022	0.3067	0.3082	0.3026	0.2977	0.3076	0.2999	0.2914	0.2874	0.3011	0.299	0.2938	0.2924	0.3039	0.304	0.2909	0.3031	0.2974	0.2971	0.2996	0.2981	0.2941	0.2903	0.2896	0.2987	0.2993	0.3053	0.305	0.3102	0.3005	0.2925	0.2994	0.2968	0.3056
Pearson's coefficient in ROI volume	0	0	0	0	0	0	0	0	0	0	0	0	0	0	0.2545	0.1639	0.3753	0.1604	0.1605	0.1761	0.2552	0.3077	0.3264	0.2396	0.3162	0.3068	0.2672	0.199	0.2437	0.2901	0.3478	0.274	0.3706	0.2493	0.2843	0.3354	0.4022	0.3865	0.3774	0.3287	0.3453	0.2848	0.3501	0.3232	0.2196	0.2014	0.2559	0.2552	0.2249
Pearson's coefficient in colocalized volume	0	0	0	0	0	0	0	0	0	0	0	0	0	0	-0.2112	0.0044	0.0511	0.0952	0.0968	0.0078	0.1518	0.1137	0.0947	0.049	0.0542	0.1435	0.1894	-0.0026	0.1991	0.2257	0.2345	0.4335	0.4857	0.548	0.468	0.3335	0.4024	0.5291	0.4047	0.5483	0.3415	0.4625	0.4492	0.5375	0.4015	0.073	0.3863	0.2586	0.3621
original Mander's coefficient A	0.9672	0.9664	0.9665	0.9656	0.966	0.9647	0.9664	0.9657	0.9649	0.9657	0.9585	0.9661	0.9628	0.966	0.9647	0.9661	0.9661	0.9663	0.9659	0.9659	0.964	0.9658	0.9679	0.9687	0.9677	0.9661	0.9663	0.9674	0.9663	0.9662	0.9674	0.9641	0.9654	0.9651	0.9639	0.9644	0.9647	0.9635	0.9606	0.9609	0.9629	0.9597	0.9592	0.9579	0.9615	0.9602	0.9622	0.9613	0.9605
original Mander's coefficient B	0.9304	0.9254	0.9235	0.9194	0.9218	0.9214	0.9188	0.928	0.9295	0.9225	0.9196	0.9217	0.9232	0.9228	0.9237	0.9165	0.9161	0.9173	0.9195	0.9164	0.9178	0.9119	0.9105	0.9074	0.9132	0.9092	0.9093	0.9059	0.9109	0.9147	0.9074	0.9088	0.9083	0.9063	0.9076	0.9062	0.9048	0.9026	0.9067	0.9089	0.9064	0.9069	0.9087	0.9023	0.9034	0.9058	0.9015	0.8981	0.8985
thresholded Mander's coefficient A	0	0	0	0	0	0	0	0	0	0	0	0	0	0	0.0006	0.0008	0.0013	0.0011	0.0013	0.0011	0.0017	0.002	0.0019	0.0016	0.0019	0.0017	0.0018	0.0012	0.0014	0.0014	0.0014	0.0006	0.0007	0.0007	0.0008	0.0008	0.0013	0.0014	0.0019	0.0014	0.0025	0.0016	0.0021	0.0017	0.0015	0.0014	0.0016	0.0017	0.0012
thresholded Mander's coefficient B	0	0	0	0	0	0	0	0	0	0	0	0	0	0	0.0006	0.0007	0.0012	0.001	0.0014	0.0011	0.0017	0.0018	0.0015	0.0014	0.0016	0.0015	0.0015	0.001	0.0013	0.0013	0.0012	0.0006	0.0006	0.0006	0.0006	0.0007	0.001	0.0011	0.0016	0.0014	0.0019	0.0015	0.0018	0.0016	0.0013	0.0013	0.0014	0.0014	0.0011
CD47KOEC_Coloc_CV1-T (V450)
time frame	1	2	3	4	5	6	7	8	9	10	11	12	13	14	15	16	17	18	19	20	21	22	23	24	25	26	27	28	29	30	31	32	33	34	35	36	37	38	39	40	41	42	43	44	45	46	47	48	49
threshold A	639.84	639.84	639.84	639.84	639.84	639.84	639.84	639.84	639.84	639.84	639.84	639.84	639.84	639.84	639.84	639.84	639.84	639.84	639.84	639.84	639.84	639.84	639.84	639.84	639.84	639.84	639.84	639.84	639.84	639.84	639.84	639.84	639.84	639.84	639.84	639.84	639.84	639.84	639.84	639.84	639.84	639.84	639.84	639.84	639.84	639.84	639.84	639.84	639.84
threshold B	1391.66	1391.66	1391.66	1391.66	1391.66	1391.66	1391.66	1391.66	1391.66	1391.66	1391.66	1391.66	1391.66	1391.66	1391.66	1391.66	1391.66	1391.66	1391.66	1391.66	1391.66	1391.66	1391.66	1391.66	1391.66	1391.66	1391.66	1391.66	1391.66	1391.66	1391.66	1391.66	1391.66	1391.66	1391.66	1391.66	1391.66	1391.66	1391.66	1391.66	1391.66	1391.66	1391.66	1391.66	1391.66	1391.66	1391.66	1391.66	1391.66
number of colocalized voxels	0	0	0	0	0	0	0	0	0	0	0	40	48	57	27	17	165	175	200	156	158	54	174	299	204	358	320	382	289	227	212	39	52	89	51	40	154	252	126	185	281	341	276	181	277	188	105	141	194
% of dataset colocalized	0	0	0	0	0	0	0	0	0	0	0	0	0	0.01	0	0	0.02	0.02	0.02	0.01	0.02	0.01	0.02	0.03	0.02	0.03	0.03	0.04	0.03	0.02	0.02	0	0	0.01	0	0	0.01	0.02	0.01	0.02	0.03	0.03	0.03	0.02	0.03	0.02	0.01	0.01	0.02
% of ROI colocalized	0	0	0	0	0	0	0	0	0	0	0	10.67	9.28	6.51	2.9	1.01	8.21	8.74	11.74	13.53	12.04	3.65	8.45	12.38	9.57	9.22	9.22	10.06	7.22	6.18	6.49	2.96	3.78	7.35	3.86	3.48	9.57	14.17	6.42	8.87	12.11	13.16	8.94	5.78	8.66	5.59	3.02	3.95	5.07
% of volume A above threshold colocalized	0	0	0	0	0	0	0	0	0	0	0	42.55	33.33	40.71	22.31	13.82	55.74	46.05	52.08	65.55	59.4	45	51.63	64.86	68.46	57.19	61.42	62.93	54.94	46.04	45.79	54.93	27.81	79.46	61.45	64.52	49.52	59.02	40.51	48.56	50.18	46.65	41.69	31.37	56.76	41.05	33.44	38.21	47.9
% of volume B above threshold colocalized	0	0	0	0	0	0	0	0	0	0	0	28.78	22.86	27.8	18.75	20.24	45.21	61.19	56.5	58.43	49.38	29.67	24.27	30.92	21.63	33.52	35.71	33.78	27.98	25.8	25.03	32.77	33.77	43.41	33.55	26.32	50.33	73.04	34.62	46.37	50.72	54.47	42.33	36.57	33.37	24.45	12.43	17.6	23.52
% of material A above threshold colocalized	0	0	0	0	0	0	0	0	0	0	0	35.55	25.01	37.93	20.56	13.92	58.68	45.89	55.71	72.94	68.73	57.43	51.59	68.11	72.18	60.56	66.57	70.25	56.93	48.16	52.08	65.65	24.25	87.59	73.39	75.61	59.48	68.56	41.43	55.22	56.68	54.05	45.15	35.52	58.5	44.94	35.68	42.4	51.6
% of material B above threshold colocalized	0	0	0	0	0	0	0	0	0	0	0	28.74	22.89	28.14	17.22	22.64	51.57	66.68	60.78	64.38	52.39	30.06	25.37	32.93	23.28	35.21	36.96	35.57	28.99	25.75	25.09	36.88	35.81	49.57	38.27	32.15	53.07	76.41	36.56	47.03	50.64	52.27	40.93	35.43	33.93	23.93	11.86	17.91	23.3
% of ROI material A colocalized	0	0	0	0	0	0	0	0	0	0	0	28.31	20.57	31.16	15.96	8.42	44.72	37.68	46.47	60.12	55.63	31.73	37.24	51.75	49.41	45.99	50.96	52.6	40.36	33.74	37.23	30.64	16.86	55.7	39.82	40.04	48.85	61.05	30.23	44.15	48.81	47.36	37.51	27.44	46.06	31.99	22.58	27.35	34.79
% of ROI material B colocalized	0	0	0	0	0	0	0	0	0	0	0	19.07	15.81	14.89	6.86	3.25	22.73	26.5	29.29	32.07	26.39	10.57	16.39	22.67	16.93	20.54	21.02	21.79	16.71	14.13	14.95	10.28	11.1	23.49	14.16	13.01	24.17	38.11	18.15	23.73	28.08	28	20.4	16.31	20.9	13.3	6.74	10.22	12.57
Pearson's coefficient in dataset volume	0.3352	0.3213	0.3141	0.2971	0.3116	0.3118	0.3181	0.3139	0.3087	0.3017	0.2317	0.3063	0.3099	0.3055	0.3024	0.3022	0.3067	0.3082	0.3026	0.2977	0.3076	0.2999	0.2914	0.2874	0.3011	0.299	0.2938	0.2924	0.3039	0.304	0.2909	0.3031	0.2974	0.2971	0.2996	0.2981	0.2941	0.2903	0.2896	0.2987	0.2993	0.3053	0.305	0.3102	0.3005	0.2925	0.2994	0.2968	0.3056
Pearson's coefficient in ROI volume	0	0	0	0	0	0	0	0	0	0	0	0.0207	-0.1063	0.1929	0.0564	0.1535	0.4632	0.4447	0.4796	0.5766	0.4835	0.3279	0.1447	0.2974	0.2867	0.3502	0.3721	0.3947	0.297	0.1979	0.2273	0.5554	0.2796	0.6705	0.5417	0.5881	0.555	0.688	0.2908	0.4143	0.4144	0.3756	0.3281	0.2917	0.3137	0.2091	0.1135	0.187	0.2499
Pearson's coefficient in colocalized volume	0	0	0	0	0	0	0	0	0	0	0	-0.0721	0.2299	-0.2952	-0.1212	0.0015	0.3498	0.1187	0.2668	0.1468	0.1838	0.1208	-0.0123	0.1665	0.2419	0.0334	-0.004	0.2324	0.0953	0.008	-0.1362	0.6263	0.3375	0.5827	0.2555	0.7461	0.2768	0.4233	0.1481	0.1415	0.1234	-0.0781	0.0326	-0.0951	-0.0918	-0.157	-0.3203	0.1223	-0.082
original Mander's coefficient A	0.9672	0.9664	0.9665	0.9656	0.966	0.9647	0.9664	0.9657	0.9649	0.9657	0.9585	0.9661	0.9628	0.966	0.9647	0.9661	0.9661	0.9663	0.9659	0.9659	0.964	0.9658	0.9679	0.9687	0.9677	0.9661	0.9663	0.9674	0.9663	0.9662	0.9674	0.9641	0.9654	0.9651	0.9639	0.9644	0.9647	0.9635	0.9606	0.9609	0.9629	0.9597	0.9592	0.9579	0.9615	0.9602	0.9622	0.9613	0.9605
original Mander's coefficient B	0.9304	0.9254	0.9235	0.9194	0.9218	0.9214	0.9188	0.928	0.9295	0.9225	0.9196	0.9217	0.9232	0.9228	0.9237	0.9165	0.9161	0.9173	0.9195	0.9164	0.9178	0.9119	0.9105	0.9074	0.9132	0.9092	0.9093	0.9059	0.9109	0.9147	0.9074	0.9088	0.9083	0.9063	0.9076	0.9062	0.9048	0.9026	0.9067	0.9089	0.9064	0.9069	0.9087	0.9023	0.9034	0.9058	0.9015	0.8981	0.8985
thresholded Mander's coefficient A	0	0	0	0	0	0	0	0	0	0	0	0.0001	0.0002	0.0003	0.0001	0.0001	0.0007	0.0007	0.0009	0.0008	0.0008	0.0002	0.0007	0.0013	0.0009	0.0015	0.0014	0.0017	0.0012	0.0009	0.001	0.0002	0.0002	0.0004	0.0002	0.0002	0.0009	0.0015	0.0005	0.001	0.0015	0.0018	0.0014	0.0009	0.0013	0.0009	0.0006	0.0007	0.0009
thresholded Mander's coefficient B	0	0	0	0	0	0	0	0	0	0	0	0.0001	0.0002	0.0002	0.0001	0.0001	0.0006	0.0007	0.0007	0.0005	0.0005	0.0002	0.0006	0.0009	0.0006	0.0012	0.0009	0.0011	0.0009	0.0007	0.0007	0.0001	0.0002	0.0003	0.0002	0.0001	0.0005	0.0009	0.0005	0.0007	0.0011	0.0013	0.0011	0.0009	0.001	0.0007	0.0005	0.0006	0.0007
One frame of real-time imaging and analysis of VE-cadherin colocalizaiton with surface junctional marker CD31 (arrowhead)
[truncated: 8 more columns]

## Sheet: Fig.5.D
Fig.5.D
1					2							3
pY416-Src (left)	WT(Discarded)		KO(Discarded)		WT		KO		WT		KO
Raw/Column	Lane 1		Lane 2		Lane 3		Lane 4		Lane 5		Lane 6
	M.W	Amount	M.W	Amount	M.W	Amount	M.W	Amount	M.W	Amount	M.W	Amount
r1	0.28674	115962	0.29036	73958	0.29156	116317	0.29277	75448	0.29518	112476	0.29759	84010
Total		115962		73958		116317		75448		112476		84010
pY529-Src (right)	WT		KO		WT		KO		WT		KO
Raw/Column	Lane 1		Lane 2		Lane 3		Lane 4		Lane 5 (Discarded)		Lane 6 (Discarded)
	M.W	Amount	M.W	Amount	M.W	Amount	M.W	Amount	M.W	Amount	M.W	Amount
r1	0.38192	174387	0.3759	165520	0.36988	154308	0.36385	155523	0.35783	139842	0.35301	153476
Total		174387		165520		154308		155523		139842		153476
beta-actin for 416-Src
Raw/Column	Lane 1		Lane 2		Lane 3		Lane 4		Lane 5		Lane 6
					M.W	Amount	M.W	Amount	M.W	Amount	M.W	Amount
r1					0.33529	609605	0.33823	864829
r2									0.35	752922	0.35588	927740
Total						609605		864829		752922		927740
beta-actin for 529-Src
Raw/Column	Lane 1		Lane 2		Lane 3		Lane 4		Lane 5		Lane 6
	M.W	Amount	M.W	Amount	M.W	Amount	M.W	Amount
r1	0.41764	741030	0.4147	841474	0.42352	730700	0.42647	680664
Total		741030		841474		730700		680664
Calculation
pY416 relative to actb
3	4	5	6
WT	KO	WT	KO
0.190807	0.0872404	0.149386	0.0905534
WT_average=	0.170097
Relative
1.12176	0.512887	0.878242	0.532365
pY529 relative to actb
1	2	3	4
WT	KO	WT	KO
0.235331	0.196702	0.211178	0.228487
WT_average=	0.223254
Relative
1.05409	0.881069	0.945909	1.02344
4						5						6						7
Src pY416	WT		Sirpa KO		WT		Sirpa KO		WT		Sirpa KO
Raw/Column	Lane 1		Lane 2		Lane 3		Lane 4		Lane 5		Lane 6
	M.W	Amount	M.W	Amount	M.W	Amount	M.W	Amount	M.W	Amount	M.W	Amount
r1	0.43494	184963	0.43734	167882	0.43975	169962	0.44216	137801	0.44337	143406	0.44457	75676
Total		184963		167882		169962		137801		143406		75676
Src pY529	WT		Sirpa KO		WT		Sirpa KO		WT		Sirpa KO
Raw/Column	Lane 1		Lane 2		Lane 3		Lane 4		Lane 5		Lane 6
	M.W	Amount	M.W	Amount	M.W	Amount	M.W	Amount	M.W	Amount	M.W	Amount
r1	0.43734	115070	0.43614	115365	0.43494	122390	0.43494	117933	0.43494	122280	0.43614	117754
Total		115070		115365		122390		117933		122280		117754
Actb(for pY416)
Raw/Column	Lane 1		Lane 2		Lane 3		Lane 4		Lane 5		Lane 6
	M.W	Amount	M.W	Amount	M.W	Amount	M.W	Amount	M.W	Amount	M.W	Amount
r1	0.47228	124678	0.47228	158861	0.47228	182701	0.47108	168815	0.46867	150132	0.46747	123820
Total		124678		158861		182701		168815		150132		123820
Actb (for pY529)
Raw/Column	Lane 1		Lane 2		Lane 3		Lane 4		Lane 5		Lane 6
	M.W	Amount	M.W	Amount	M.W	Amount	M.W	Amount	M.W	Amount	M.W	Amount
r1	0.42168	124274	0.42168	137863	0.42289	124036	0.4253	163898	0.4265	157123	0.42771	168656
Total		124274		137863		124036		163898		157123		168656
Calculation
Src pY416	relative to actb
WT	KO	WT	KO	WT	KO
1.48353	1.05679	0.930274	0.816284	0.955199	0.611178
WT average
1.123
Relative
1.32104	0.941038	0.828383	0.726878	0.850579	0.544237
Src pY529	relative to actb
WT	KO	WT	KO	WT	KO
0.925938	0.836809	0.98673	0.719551	0.778244	0.69819
WT average
0.89697
Relative
1.03229	0.932928	1.10007	0.802202	0.867636	0.778387

## Sheet: Fig.5.E,F
Fig.5.E
pY416-Src
WT	Sirpa-/-
1.12176	0.512887
0.878242	0.532365
1.32104	0.941038
0.828383	0.726878
0.850579	0.544237
Fig.5.E
pY529-Src
WT	Sirpa-/-
1.05409	0.881069
0.945909	1.02344
1.03229	0.932928
1.10007	0.802202
0.867636	0.778387

## Sheet: Fig.5.G
Fig.5.G
1						2						3
Src pY416	rat Ig		CD47
Raw/Column	Lane 1		Lane 2
	M.W	Amount	M.W	Amount
r1	0.39638	260332	0.39518	325893
Total		260332		325893
Src pY529	rat Ig		CD47
Raw/Column	Lane 1		Lane 2
	M.W	Amount	M.W	Amount
r1	0.46867	192505	0.46867	200298
Total		192505		200298
Actb	Lane 1		Lane 2
	M.W	Amount	M.W	Amount
r1	0.41686	291467	0.41686	263562
Total		291467		263562
Calculation
pY416 relative to actb
1	2
rat Ig	CD47
0.893178	1.62704
RatIg_average=	0.893178
Relative
1	1.82163
pY529 relative to actb
1	2
rat Ig	CD47
0.660469	0.759965
RatIg average	0.660469
Relative
1	1.15064
4						5						6
SrcpY416	rat Ig		CD47		rat Ig		CD47		rat Ig		CD47
Raw/Column	Lane 1		Lane 2		Lane 3		Lane 4		Lane 5		Lane 6
	M.W	Amount	M.W	Amount	M.W	Amount	M.W	Amount	M.W	Amount	M.W	Amount
r1	0.375	694160	0.36935	797828	0.36733	371387	0.36693	559042	0.36572	653029	0.36451	870481
Total		694160		797828		371387		559042		653029		870481
Src 529	rat Ig		CD47		rat Ig		CD47		rat Ig		CD47	CD47
Raw/Column	Lane 1		Lane 2		Lane 3		Lane 4		Lane 5		Lane 6
	M.W	Amount	M.W	Amount	M.W	Amount	M.W	Amount	M.W	Amount	M.W	Amount
r1	0.56341	135855	0.56219	127148	0.56463	128549	0.56585	103489	0.57073	85966	0.57073	92396
Total		135855		127148		128549		103489		85966		92396
Actb batch 2
Raw/Column	Lane 1		Lane 2		Lane 3		Lane 4		Lane 5		Lane 6
	M.W	Amount	M.W	Amount	M.W	Amount	M.W	Amount	M.W	Amount	M.W	Amount
r1	0.44819	137163	0.4506	110251	0.44939	104032	0.4518	137949	0.45542	138481	0.45783	111350
Total		137163		110251		104032		137949		138481		111350
Calculation
Src pY416	relative to actb
rat Ig	CD47	rat Ig	CD47	rat Ig	CD47
5.06084	7.23647	3.56993	4.05253	4.71566	7.81752
RatIg average
4.44881
Relative
1.13757	1.62661	0.802446	0.910924	1.05998	1.75722
Src pY529	relative to actb
rat Ig	CD47	rat Ig	CD47	rat Ig	CD47
0.990464	1.15326	1.23567	0.750198	0.620778	0.82978
RatIg average
0.94897
Relative
1.04373	1.21527	1.30211	0.790539	0.65416	0.874401

## Sheet: Fig.5.H,I
Fig.5.H
pY416-Src
RatIg	+CD47
1	1.82163
1.13757	1.62661
0.802446	0.910924
1.05998	1.75722
Fig.5.I
pY529-Src
RatIg	+CD47
1	1.15064
1.04373	1.21528
1.30211	0.790539
0.65416	0.874401

## Sheet: Fig.5.J
Relative TEM
DMSO	PP2
1.08621	0.950581
0.889354	0.684112
1.02443	0.767262
1.00061	0.664004
0.999391	0.705422
