# Supplementary material for: Endothelial SIRPα signaling controls VE-cadherin endocytosis for thymic homing of progenitor cells
Source: eLife. 2022 May 5;11:e69219. doi: 10.7554/eLife.69219 (PMC9071265; doi:10.7554/eLife.69219)
Supplement: Figure 6—source data 1. [file elife-69219-fig6-data1.xlsx]

## Sheet: Fig.6.B
Fig.6 Panel B
Slice	Endocytic VE-Cadherin Count	EC Cell Count	VE-cadherin Count Per Cell
IC_KO_63_4c_TNFa+T_001_Laser5_c1-1.jpg	211	38	5.55263
IC_KO_63_4c_TNFa+T_002_Laser5_c1-1.jpg	442	46	9.6087
IC_KO_63_4c_TNFa+T_003_Laser5_c1-1.jpg	477	44	10.8409
IC_KO_63_4c_TNFa+T_004_Laser5_c1-1.jpg	922	55	16.7636
IC_KO_63_4c_TNFa+T_005_Laser5_c1-1.jpg	119	43	2.76744
IC_KO_63_4c_TNFa+T_006_Laser5_c1-1.jpg	643	51	12.6078
IC_KO_63_4c_TNFa+T_007_Laser5_c1-1.jpg	640	46	13.913
IC_KO_63_4c_TNFa+T_008_Laser5_c1-1.jpg	329	38	8.65789
IC_WT_63_4c_TNFa+T_001_Laser5_c1-1.jpg	734	57	12.8772
IC_WT_63_4c_TNFa+T_002_Laser5_c1-1.jpg	970	52	18.6538
IC_WT_63_4c_TNFa+T_003_Laser5_c1-1.jpg	485	52	9.32692
IC_WT_63_4c_TNFa+T_004_Laser5_c1-1.jpg	1048	47	22.2979
IC_WT_63_4c_TNFa+T_005_Laser5_c1-1.jpg	661	47	14.0638
IC_WT_63_4c_TNFa+T_006_Laser5_c1-1.jpg	1183	61	19.3934
IC_WT_63_4c_TNFa+T_007_Laser5_c1-1.jpg	932	60	15.5333
IC_WT_63_4c_TNFa+T_008_Laser5_c1-1.jpg	549	54	10.1667
IC_KO_4c_NT_001_Laser5_c1-1.jpg	450	43	10.4651
IC_KO_4c_NT_002_Laser5_c1-1.jpg	603	61	9.88525
IC_KO_4c_NT_003_Laser5_c1-1.jpg	717	53	13.5283
IC_KO_4c_NT_004_Laser5_c1-1.jpg	833	49	17
IC_KO_4c_NT_005_Laser5_c1-1.jpg	747	59	12.661
IC_WT_63_4c_NT_001_Laser5_c1-1.jpg	680	51	13.3333
IC_WT_63_4c_NT_002_Laser5_c1-1.jpg	471	56	8.41071
IC_WT_63_4c_NT_003_Laser5_c1-1.jpg	716	50	14.32
IC_WT_63_4c_NT_004_Laser5_c1-1.jpg	755	45	16.7778
IC_WT_63_4c_NT_005_Laser5_c1-1.jpg	608	47	12.9362

## Sheet: Fig.6.D
Fig.6 Panel D
Slice	Endocytic VE-Cadherin Count	Raw Count	EC Cell Count	VE-cadherin Count Per Cell
63x_WT_Resting_001_Ch1-T1-1.tif	739	48	48	15.3958
63x_WT_Resting_002_Ch1-T1-1.tif	289	36	36	8.02778
63x_WT_Resting_003_Ch1-T1-1.tif	501	61	61	8.21311
63x_WT_Resting_004_Ch1-T1-1.tif	157	44	44	3.56818
63x_WT_TNFa_001_Ch1-T1-1.tif	336	40	40	8.4
63x_WT_TNFa_002_Ch1-T1-1.tif	379	40	40	9.475
63x_WT_TNFa_003_Ch1-T1-1.tif	138	35	35	3.94286
63x_WT_TNFa_004_Ch1-T1-1.tif	516	43	43	12
63x_WT_TNFa+T_001_Ch1-T1-1.tif	679	82	39.5	17.1899	Note: TNFa+T slides have plenty of T cell interfering with cell count, using average MS1 cell number of no T group instead
63x_WT_TNFa+T_002_Ch1-T1-1.tif	528	62	39.5	13.3671
63x_WT_TNFa+T_003_Ch1-T1-1.tif	818	49	39.5	20.7089
63x_WT_TNFa+T_004_Ch1-T1-1.tif	837	68	39.5	21.1899
63x_dICD_B2_Resting_001_Ch1-T1-1.tif	171	33	33	5.18182
63x_dICD_B2_Resting_002_Ch1-T1-1.tif	200	37	37	5.40541
63x_dICD_B2_Resting_003_Ch1-T1-1.tif	134	33	33	4.06061
63x_dICD_B2_Resting_004_Ch1-T1-1.tif	132	38	38	3.47368
63x_dICD_B2_Resting_005_Ch1-T1-1.tif	296	41	41	7.21951
63x_dICD_B2_TNFa_001_Ch1-T1-1.tif	176	35	35	5.02857
63x_dICD_B2_TNFa_002_Ch1-T1-1.tif	273	35	35	7.8
63x_dICD_B2_TNFa_003_Ch1-T1-1.tif	104	39	39	2.66667
63x_dICD_B2_TNFa_004_Ch1-T1-1.tif	249	33	33	7.54545
63x_dICD_B2_TNFa_005_Ch1-T1-1.tif	260	51	51	5.09804
63x_dICD_B2_TNFa+T_001_Ch1-T1-1.tif	284	57	38.6	7.35751	Note: TNFa+T slides have plenty of T cell interfering with cell count, using average MS1 cell number of no T group instead
63x_dICD_B2_TNFa+T_002_Ch1-T1-1.tif	270	57	38.6	6.99482
63x_dICD_B2_TNFa+T_003_Ch1-T1-1.tif	326	58	38.6	8.4456
63x_dICD_B2_TNFa+T_004_Ch1-T1-1.tif	224	56	38.6	5.80311
63x_dICD_B2_TNFa+T_005_Ch1-T1-1.tif	178	41	38.6	4.6114
63x_dICD_B5_Resting_001_Ch1-T1-1.tif	328	54	54	6.07407
63x_dICD_B5_Resting_002_Ch1-T1-1.tif	319	46	46	6.93478
63x_dICD_B5_Resting_003_Ch1-T1-1.tif	245	41	41	5.97561
63x_dICD_B5_Resting_004_Ch1-T1-1.tif	388	45	45	8.62222
63x_dICD_B5_TNFa_001_Ch1-T1-1.tif	108	33	33	3.27273
63x_dICD_B5_TNFa_002_Ch1-T1-1.tif	139	41	41	3.39024
63x_dICD_B5_TNFa_003_Ch1-T1-1.tif	167	48	48	3.47917
63x_dICD_B5_TNFa_004_Ch1-T1-1.tif	214	50	50	4.28
63x_dICD_B5_TNFa+T_001_Ch1-T1-1.tif	470	42	43	10.9302	Note: TNFa+T slides have plenty of T cell interfering with cell count, using average MS1 cell number of no T group instead
63x_dICD_B5_TNFa+T_002_Ch1-T1-1.tif	453	43	43	10.5349
63x_dICD_B5_TNFa+T_003_Ch1-T1-1.tif	387	60	43	9
63x_dICD_B5_TNFa+T_004_Ch1-T1-1.tif	262	46	43	6.09302

## Sheet: Fig.6.E
Fig.6 Panel E
Slice	Endocytic VE-Cadherin Count	EC Cell Count	VE-cadherin Count Per Cell
SK_T+_PP2+_00119_c1-1.tif	51	43	1.19
SK_T+_PP2+_00220_c1-1.tif	20	54	0.37
SK_T+_PP2+_00321_c1-1.tif	24	55	0.44
SK_T+_PP2+_00422_c1-1.tif	18	57	0.32
SK_T+_PP2+_00523_c1-1.tif	43	45	0.96
SK_T+_PP2+_00624_c1-1.tif	33	55	0.6
SK_T+_PP2-_00113_c1-1.tif	48	52	0.92
SK_T+_PP2-_00214_c1-1.tif	24	43	0.56
SK_T+_PP2-_00315_c1-1.tif	24	49	0.49
SK_T+_PP2-_00416_c1-1.tif	30	50	0.6
SK_T+_PP2-_00517_c1-1.tif	40	49	0.82
SK_T+_PP2-_00618_c1-1.tif	47	51	0.92
SK_T-_PP2+_00107_c1-1.tif	44	39	1.13
SK_T-_PP2+_00208_c1-1.tif	45	42	1.07
SK_T-_PP2+_00309_c1-1.tif	34	37	0.92
SK_T-_PP2+_00410_c1-1.tif	53	41	1.29
SK_T-_PP2+_00511_c1-1.tif	46	57	0.81
SK_T-_PP2+_00612_c1-1.tif	44	34	1.29
SK_T-_PP2-_00101_c1-1.tif	86	48	1.79
SK_T-_PP2-_00202_c1-1.tif	69	45	1.53
SK_T-_PP2-_00303_c1-1.tif	73	44	1.66
SK_T-_PP2-_00404_c1-1.tif	49	36	1.36
SK_T-_PP2-_00505_c1-1.tif	58	41	1.41
SK_T-_PP2-_00606_c1-1.tif	22	44	0.5
WT_T+_PP2+_00143_c1-1.tif	21	48	0.44
WT_T+_PP2+_00244_c1-1.tif	19	50	0.38
WT_T+_PP2+_00345_c1-1.tif	27	50	0.54
WT_T+_PP2+_00446_c1-1.tif	20	54	0.37
WT_T+_PP2+_00547_c1-1.tif	10	59	0.17
WT_T+_PP2+_00648_c1-1.tif	23	47	0.49
WT_T+_PP2-_00137_c1-1.tif	102	44	2.32
WT_T+_PP2-_00238_c1-1.tif	91	47	1.94
WT_T+_PP2-_00339_c1-1.tif	141	48	2.94
WT_T+_PP2-_00440_c1-1.tif	85	42	2.02
WT_T+_PP2-_00541_c1-1.tif	78	47	1.66
WT_T+_PP2-_00642_c1-1.tif	232	55	4.22
WT_T-_PP2+_00131_c1-1.tif	13	53	0.25
WT_T-_PP2+_00232_c1-1.tif	13	39	0.33
WT_T-_PP2+_00333_c1-1.tif	13	56	0.23
WT_T-_PP2+_00434_c1-1.tif	9	43	0.21
WT_T-_PP2+_00535_c1-1.tif	25	50	0.5
WT_T-_PP2+_00636_c1-1.tif	21	47	0.45
WT_T-_PP2-_00125_c1-1.tif	38	59	0.64
WT_T-_PP2-_00226_c1-1.tif	41	44	0.93
WT_T-_PP2-_00327_c1-1.tif	73	58	1.26
WT_T-_PP2-_00428_c1-1.tif	84	39	2.15
WT_T-_PP2-_00529_c1-1.tif	72	44	1.64
WT_T-_PP2-_00630_c1-1.tif	60	47	1.28
	ImageJ batch macro for MS1 EC cell number count
	//Cell_Count, Ver.20180804,1.0 RBY; title = getTitle(); selectWindow(title); run("Duplicate...", " "); duptitle=getTitle(); selectWindow(duptitle); run("8-bit"); //run("Threshold..."); setAutoThreshold("Default dark"); call("ij.plugin.frame.ThresholdAdjuster.setMode", "B&W"); setThreshold(5, 150); run("Convert to Mask"); //analyze particles; selectWindow(duptitle); run("Set Scale...", "distance=1…

## Sheet: Batch code for VEC endocytosis
ImageJ batch macro for statistical analysis of VE-cadherin dots in each filed:
//Ver.20180804, RBY; title = getTitle(); selectWindow(title); run("Duplicate...", " "); duptitle=getTitle(); selectWindow(duptitle); run("8-bit"); //Threshold setAutoThreshold("Mean dark"); call("ij.plugin.frame.ThresholdAdjuster.setMode", "B&W"); setThreshold(30, 150); //analyze particles; run("Convert to Mask"); selectWindow(duptitle); run("Set Scale...", "distance=1 known=1 pixel=1 unit=inch g…

## Sheet: Fig.6.F,G
Fig.6 Panel F,G
CD47KOEC_Coloc_hIg-T(V450)
time frame	1	2	3	4	5	6	7	8	9	10	11	12	13	14	15	16	17	18	19	20	21	22	23	24	25	26	27	28	29	30	31	32	33	34	35	36	37	38	39	40	41	42	43	44	45	46	47	48	49
threshold A	2081.02	2081.02	2081.02	2081.02	2081.02	2081.02	2081.02	2081.02	2081.02	2081.02	2081.02	2081.02	2081.02	2081.02	2081.02	2081.02	2081.02	2081.02	2081.02	2081.02	2081.02	2081.02	2081.02	2081.02	2081.02	2081.02	2081.02	2081.02	2081.02	2081.02	2081.02	2081.02	2081.02	2081.02	2081.02	2081.02	2081.02	2081.02	2081.02	2081.02	2081.02	2081.02	2081.02	2081.02	2081.02	2081.02	2081.02	2081.02	2081.02
threshold B	1648.81	1648.81	1648.81	1648.81	1648.81	1648.81	1648.81	1648.81	1648.81	1648.81	1648.81	1648.81	1648.81	1648.81	1648.81	1648.81	1648.81	1648.81	1648.81	1648.81	1648.81	1648.81	1648.81	1648.81	1648.81	1648.81	1648.81	1648.81	1648.81	1648.81	1648.81	1648.81	1648.81	1648.81	1648.81	1648.81	1648.81	1648.81	1648.81	1648.81	1648.81	1648.81	1648.81	1648.81	1648.81	1648.81	1648.81	1648.81	1648.81
number of colocalized voxels	0	0	0	0	0	0	0	0	0	112	91	88	63	69	60	49	51	74	69	106	95	131	108	105	159	142	112	175	154	186	199	170	168	174	148	113	163	138	169	179	168	152	175	144	181	178	181	206	202
% of dataset colocalized	0	0	0	0	0	0	0	0	0	0.01	0.01	0.01	0.01	0.01	0.01	0	0	0.01	0.01	0.01	0.01	0.01	0.01	0.01	0.02	0.01	0.01	0.02	0.01	0.02	0.02	0.02	0.02	0.02	0.01	0.01	0.02	0.01	0.02	0.02	0.02	0.01	0.02	0.01	0.02	0.02	0.02	0.02	0.02
% of ROI colocalized	0	0	0	0	0	0	0	0	0	4.85	3.61	3.64	3.35	1.74	1.6	1.25	1.24	1.84	1.4	1.78	1.68	2.2	1.82	1.73	2.66	2.34	1.75	2.89	2.8	3.06	3.31	2.97	2.94	3.04	2.7	1.96	2.81	2.41	2.96	3.24	3	2.79	3.16	2.42	3.18	3.07	3.31	3.11	2.34
% of volume A above threshold colocalized	0	0	0	0	0	0	0	0	0	44.98	37.3	32.71	31.19	34.85	23.35	19.22	20.32	25.34	19.83	25.36	22.57	24.08	24	21.74	29.28	27.57	18.45	28.83	32.77	28.18	29.57	30.36	28.57	28.25	25.65	23.94	28.85	28.57	30.62	32.66	30.32	27.94	31.31	22.26	32.38	29.13	33.15	35.64	33.95
% of volume B above threshold colocalized	0	0	0	0	0	0	0	0	0	36.13	36.55	44.22	34.43	34.33	45.8	39.84	43.22	37	42.59	34.75	23.17	45.96	44.44	43.21	46.9	52.01	44.62	51.62	46.53	49.47	52.93	47.35	47.32	51.79	41.69	35.42	52.24	37.5	40.33	44.75	44.68	42.82	44.3	41.26	44.36	41.59	46.65	40	37.76
% of material A above threshold colocalized	0	0	0	0	0	0	0	0	0	48.26	38.99	34.03	33.33	36.38	25.04	20.61	22.2	26.28	21.58	26.46	23.87	25.87	25.57	23.31	31.82	30.51	19.99	31.12	35.46	30.26	31.92	33.18	30.53	30.66	27.93	26	32.3	31.45	34.07	36.1	32.96	30.84	34.25	24.23	35.64	31.7	36.23	38.49	37.1
% of material B above threshold colocalized	0	0	0	0	0	0	0	0	0	37.9	38.38	46.48	38.74	37.55	49.31	43.07	44.86	40.17	44.17	35.17	23.81	47.73	46.66	44.27	50.68	55.47	44.71	54.59	50.18	51.09	55.52	50.2	49.89	54.46	44.44	39.6	56	38.11	42.4	47.34	47.74	46.73	47.77	42.54	47.93	43.67	49.34	42.83	41.31
% of ROI material A colocalized	0	0	0	0	0	0	0	0	0	24	18.38	17.69	15.15	13.04	9.54	7.3	8.01	10.35	9.09	11.55	9.63	12.07	10.37	9.84	15.06	13.51	9.68	15.09	16.32	14.77	16.4	15.55	15.29	15.45	13.98	11.4	16.04	14.93	16.45	18.19	16.56	15.85	17.24	12.68	18.24	16.54	19.08	19.64	16.78
% of ROI material B colocalized	0	0	0	0	0	0	0	0	0	13.73	12.14	13.7	11.78	8.11	6.94	5.61	5.65	8.2	6.1	7.16	6.05	9.23	7.4	7.27	10.66	9.4	6.6	10.86	10.93	11.92	13.47	11.68	12.3	13.23	11.44	9.17	13.5	10.84	12.78	13.97	13.14	12.41	13.19	10.66	13.51	12.56	14.81	13.68	9.97
Pearson's coefficient in dataset volume	0.4026	0.4152	0.4152	0.4059	0.4171	0.4129	0.3967	0.4	0.4001	0.4099	0.4104	0.4043	0.4101	0.4179	0.3994	0.4123	0.4105	0.3996	0.402	0.3871	0.4088	0.4035	0.4021	0.4021	0.3982	0.4018	0.3877	0.4025	0.4084	0.394	0.3949	0.4002	0.3888	0.3932	0.3879	0.3972	0.3936	0.39	0.3931	0.3833	0.3858	0.3917	0.3914	0.3727	0.3893	0.3823	0.3837	0.3679	0.3739
Pearson's coefficient in ROI volume	0	0	0	0	0	0	0	0	0	0.534	0.4782	0.4588	0.4632	0.532	0.4508	0.434	0.4703	0.4102	0.4176	0.3876	0.3011	0.4463	0.4557	0.4819	0.5069	0.5475	0.4557	0.5114	0.5493	0.4935	0.5225	0.5235	0.5078	0.5471	0.487	0.4906	0.5501	0.491	0.5076	0.5369	0.4897	0.4728	0.4925	0.4328	0.5224	0.4717	0.4954	0.4617	0.4402
Pearson's coefficient in colocalized volume	0	0	0	0	0	0	0	0	0	0.2111	0.0945	0.0325	0.0919	0.2319	0.2615	0.1626	0.1534	0.0407	-0.0245	0.2658	-0.1363	0.1462	0.1875	-0.0642	0.3398	0.1884	0.2337	0.3399	0.1473	0.1079	0.1748	-0.0233	0.183	0.242	0.2248	0.4202	0.2993	0.1224	0.2581	0.2754	0.2032	0.2495	0.2642	0.2435	0.3462	0.2811	0.1179	0.1614	0.2296
original Mander's coefficient A	0.9615	0.962	0.9605	0.9603	0.9603	0.957	0.9525	0.9533	0.9558	0.9577	0.9585	0.9576	0.958	0.9569	0.9558	0.9567	0.9574	0.9589	0.9555	0.9549	0.9558	0.9539	0.9523	0.9525	0.9551	0.9556	0.9525	0.9558	0.958	0.9554	0.9541	0.9552	0.9547	0.9571	0.9547	0.9548	0.9551	0.9541	0.955	0.9542	0.953	0.9546	0.9544	0.9498	0.9545	0.9512	0.9548	0.9538	0.9523
original Mander's coefficient B	0.9796	0.9746	0.9747	0.9737	0.9687	0.9666	0.9696	0.9666	0.9683	0.9651	0.9649	0.966	0.9693	0.9685	0.9677	0.9675	0.9672	0.9672	0.9672	0.9645	0.9655	0.9636	0.9652	0.9652	0.9647	0.9616	0.9626	0.9616	0.9601	0.9606	0.9616	0.9581	0.961	0.9592	0.9589	0.956	0.9588	0.9568	0.9552	0.9556	0.9556	0.9544	0.9544	0.9569	0.9586	0.9583	0.9582	0.9568	0.954
thresholded Mander's coefficient A	0	0	0	0	0	0	0	0	0	0.001	0.0008	0.0007	0.0006	0.0006	0.0005	0.0004	0.0004	0.0006	0.0006	0.0009	0.0009	0.001	0.0008	0.0009	0.0012	0.0011	0.0009	0.0014	0.0013	0.0015	0.0016	0.0014	0.0014	0.0014	0.0013	0.001	0.0013	0.0012	0.0015	0.0015	0.0014	0.0013	0.0015	0.0012	0.0016	0.0016	0.0015	0.0017	0.0018
thresholded Mander's coefficient B	0	0	0	0	0	0	0	0	0	0.0006	0.0005	0.0005	0.0004	0.0004	0.0004	0.0004	0.0004	0.0005	0.0005	0.0007	0.0007	0.001	0.0008	0.0009	0.001	0.001	0.001	0.0011	0.0009	0.0012	0.0013	0.0011	0.0011	0.0012	0.0011	0.0009	0.0011	0.001	0.0011	0.0012	0.0011	0.001	0.0011	0.0012	0.0012	0.0012	0.0011	0.0013	0.0013
CD47KOEC_Coloc_CV1-T (PE)
time frame	1	2	3	4	5	6	7	8	9	10	11	12	13	14	15	16	17	18	19	20	21	22	23	24	25	26	27	28	29	30	31	32	33	34	35	36	37	38	39	40	41	42	43	44	45	46	47	48	49
threshold A	2081.02	2081.02	2081.02	2081.02	2081.02	2081.02	2081.02	2081.02	2081.02	2081.02	2081.02	2081.02	2081.02	2081.02	2081.02	2081.02	2081.02	2081.02	2081.02	2081.02	2081.02	2081.02	2081.02	2081.02	2081.02	2081.02	2081.02	2081.02	2081.02	2081.02	2081.02	2081.02	2081.02	2081.02	2081.02	2081.02	2081.02	2081.02	2081.02	2081.02	2081.02	2081.02	2081.02	2081.02	2081.02	2081.02	2081.02	2081.02	2081.02
threshold B	1648.81	1648.81	1648.81	1648.81	1648.81	1648.81	1648.81	1648.81	1648.81	1648.81	1648.81	1648.81	1648.81	1648.81	1648.81	1648.81	1648.81	1648.81	1648.81	1648.81	1648.81	1648.81	1648.81	1648.81	1648.81	1648.81	1648.81	1648.81	1648.81	1648.81	1648.81	1648.81	1648.81	1648.81	1648.81	1648.81	1648.81	1648.81	1648.81	1648.81	1648.81	1648.81	1648.81	1648.81	1648.81	1648.81	1648.81	1648.81	1648.81
number of colocalized voxels	0	0	0	0	0	0	0	41	15	43	46	53	216	250	250	350	305	587	471	337	378	610	513	397	451	404	298	294	305	254	257	309	276	298	267	284	255	236	197	283	321	325	307	257	239	190	164	130	136
% of dataset colocalized	0	0	0	0	0	0	0	0	0	0	0	0.01	0.02	0.02	0.02	0.03	0.03	0.06	0.04	0.03	0.04	0.06	0.05	0.04	0.04	0.04	0.03	0.03	0.03	0.02	0.02	0.03	0.03	0.03	0.03	0.03	0.02	0.02	0.02	0.03	0.03	0.03	0.03	0.02	0.02	0.02	0.02	0.01	0.01
% of ROI colocalized	0	0	0	0	0	0	0	8.65	6.12	7.49	5.9	2.79	3.71	3.75	3.42	3.21	2.58	4.18	3.39	2.98	3.28	4.21	3.17	2.62	3.05	2.85	2.18	2.31	2.57	2.19	2.26	2.76	2.41	2.92	2.49	2.76	2.6	2.48	2.21	2.98	3.44	3.77	3.56	3.06	3.31	2.79	2.87	2.44	2.02
% of volume A above threshold colocalized	0	0	0	0	0	0	0	68.33	68.18	61.43	58.23	35.81	64.09	56.18	50.61	44.81	44.46	52.5	39.05	42.23	44.84	57.77	37.78	40.06	42.39	42.66	32.43	38.43	38.9	33.82	34.45	38.82	35.57	38.75	35.65	37.77	35.97	34.15	31.88	39.86	41.96	43.8	41.83	34.68	37.94	38.93	34.67	34.39	30.49
% of volume B above threshold colocalized	0	0	0	0	0	0	0	60.29	53.57	58.11	33.58	42.06	37.18	33.29	30.75	36.01	35.51	34.41	33.26	26.14	33.36	33.24	30.05	32.25	32.47	31.08	27.29	25.26	26.27	24.03	25.3	27.91	26.54	26.58	24.79	29.74	25.27	25.27	22.51	23.96	29.42	29.41	28.77	27.9	23.83	26.24	22.13	19.26	18.89
% of material A above threshold colocalized	0	0	0	0	0	0	0	73.83	72.77	64.93	63.74	37.26	65.22	58.82	52.04	47.19	46.48	54.51	40.81	43.63	47.45	60.28	40.29	43.16	45.74	45.92	33.94	41.26	41.5	35.74	36.22	40.05	37.49	40.09	35.47	39.91	38.16	35.91	33.37	42.49	43.26	45.7	43.4	35.77	38.57	40.37	35.99	34.96	30.64
% of material B above threshold colocalized	0	0	0	0	0	0	0	63.3	60.66	63.12	38.24	47.93	39.43	35.74	34.38	40.3	40.42	39.44	36.72	29.88	38.46	38.96	34.14	37.06	37.93	36.34	29.72	28.05	28.55	26.02	27.5	30.27	28.56	29.11	26.48	33.48	27.72	28.03	25.48	27.02	34.15	34.29	32.46	32.29	27.97	29.84	25.09	21.62	21.11
% of ROI material A colocalized	0	0	0	0	0	0	0	37.41	27.31	31.35	29.31	18	26.29	25.89	22.18	20.65	18.07	24.57	20.21	17.88	19.37	27.75	18.41	16.79	18.97	17.87	13.24	14.8	15.28	13.67	13.47	15.85	14.79	17.11	14.48	16.83	15.74	14.61	13.26	17.37	18.71	20.17	18.7	16.19	16.58	16.59	14.94	14.04	12.05
% of ROI material B colocalized	0	0	0	0	0	0	0	23.21	20.86	21.36	15.64	17.26	16.57	14.03	13.24	13.24	11.13	14.54	12.65	10.68	12.67	15.67	12.04	11.47	13.13	12.08	9.1	9.37	9.64	8.38	9.07	10.65	9.51	10.82	9.35	11.15	10	9.99	8.63	10.54	12.68	13.57	12.67	11.67	11.25	9.93	8.99	7.94	7.01
Pearson's coefficient in dataset volume	0.4026	0.4152	0.4152	0.4059	0.4171	0.4129	0.3967	0.4	0.4001	0.4099	0.4104	0.4043	0.4101	0.4179	0.3994	0.4123	0.4105	0.3996	0.402	0.3871	0.4088	0.4035	0.4021	0.4021	0.3982	0.4018	0.3877	0.4025	0.4084	0.394	0.3949	0.4002	0.3888	0.3932	0.3879	0.3972	0.3936	0.39	0.3931	0.3833	0.3858	0.3917	0.3914	0.3727	0.3893	0.3823	0.3837	0.3679	0.3739
Pearson's coefficient in ROI volume	0	0	0	0	0	0	0	0.6505	0.728	0.705	0.5477	0.5162	0.5699	0.5169	0.4962	0.5207	0.5056	0.4997	0.4381	0.4205	0.4829	0.5426	0.4254	0.4482	0.4503	0.4418	0.3475	0.3976	0.3933	0.3567	0.3535	0.3981	0.3759	0.3945	0.3823	0.4264	0.3851	0.3824	0.3603	0.367	0.4429	0.4542	0.4197	0.3955	0.3879	0.3973	0.3452	0.3113	0.3119
Pearson's coefficient in colocalized volume	0	0	0	0	0	0	0	0.3703	0.1821	0.3181	0.1981	0.0968	0.0758	0.155	0.2733	0.1831	0.393	0.2761	0.1823	0.1919	0.2854	0.1845	0.2109	0.2266	0.2706	0.2675	0.1877	0.1971	0.3366	0.2298	0.23	0.1881	0.2264	0.2069	0.1678	0.243	0.2414	0.2695	0.1979	0.2847	0.1983	0.3334	0.2906	0.1914	0.1549	0.0989	0.1087	0.0669	0.0828
original Mander's coefficient A	0.9615	0.962	0.9605	0.9603	0.9603	0.957	0.9525	0.9533	0.9558	0.9577	0.9585	0.9576	0.958	0.9569	0.9558	0.9567	0.9574	0.9589	0.9555	0.9549	0.9558	0.9539	0.9523	0.9525	0.9551	0.9556	0.9525	0.9558	0.958	0.9554	0.9541	0.9552	0.9547	0.9571	0.9547	0.9548	0.9551	0.9541	0.955	0.9542	0.953	0.9546	0.9544	0.9498	0.9545	0.9512	0.9548	0.9538	0.9523
original Mander's coefficient B	0.9796	0.9746	0.9747	0.9737	0.9687	0.9666	0.9696	0.9666	0.9683	0.9651	0.9649	0.966	0.9693	0.9685	0.9677	0.9675	0.9672	0.9672	0.9672	0.9645	0.9655	0.9636	0.9652	0.9652	0.9647	0.9616	0.9626	0.9616	0.9601	0.9606	0.9616	0.9581	0.961	0.9592	0.9589	0.956	0.9588	0.9568	0.9552	0.9556	0.9556	0.9544	0.9544	0.9569	0.9586	0.9583	0.9582	0.9568	0.954
thresholded Mander's coefficient A	0	0	0	0	0	0	0	0.0003	0.0001	0.0003	0.0004	0.0004	0.0018	0.0021	0.0022	0.003	0.0025	0.0049	0.004	0.0031	0.0034	0.0053	0.0046	0.0035	0.0039	0.0036	0.0027	0.0028	0.0029	0.0024	0.0024	0.0028	0.0026	0.0028	0.0025	0.0026	0.0024	0.0023	0.0019	0.0027	0.003	0.0031	0.0029	0.0024	0.0024	0.0018	0.0017	0.0014	0.0015
thresholded Mander's coefficient B	0	0	0	0	0	0	0	0.0002	0.0001	0.0002	0.0002	0.0003	0.001	0.0012	0.0013	0.002	0.0017	0.0029	0.0028	0.002	0.002	0.0033	0.0033	0.0024	0.0025	0.0023	0.0018	0.0017	0.0017	0.0015	0.0015	0.0018	0.0016	0.0017	0.0016	0.0017	0.0015	0.0015	0.0013	0.0016	0.0019	0.0018	0.0017	0.0017	0.0014	0.0011	0.001	0.0008	0.0008
[truncated: 17 more columns]
