# Supplementary material for: Endothelial SIRPα signaling controls VE-cadherin endocytosis for thymic homing of progenitor cells
Source: eLife. 2022 May 5;11:e69219. doi: 10.7554/eLife.69219 (PMC9071265; doi:10.7554/eLife.69219)
Supplement: Supplementary file 1. [file elife-69219-supp1.xlsx]

## Sheet: Fig.1.A.GSE_83114_FPKM
geneid	Type1.1	Type1.2	Type2.1	Type2.2	Type3.1	Type3.2	3vs1_Ttest	3vs1_FC	3vs2_Ttest	3vs2_FC	FPKM>10	3Sig in 1 or 2	In cell migration GO
Pcdha4-g	8.72e-12	8.53e-17	2.35e-15	3.38e-19	0	5.79e-302	0.422642	963.95	0.422539	952.093	8.72244e-12	TRUE	#N/A
Tymp	1.33974	0.79165	1.46e-54	0.494728	4.69e-191	1.03e-82	0.0602158	273.447	0.42265	271.34	2.62612	TRUE	#N/A
Fuca1	16.4634	16.3774	23.2065	20.9685	32.6302	32.5233	1.80279e-05	0.988353	0.0112152	0.560613	142.169	FALSE	#N/A
Pira1	0	9.1e-60	0.0973853	0.0635896	0	1.48e-05	0.42265	180.086	0.0413683	13.409	0.16099	TRUE	#N/A
Xkr4	0	0	0	0.0782889	0	0	#DIV/0!	#DIV/0!	0.42265	#NUM!	0.0782889	#DIV/0!	#N/A
Prickle1	9.999	10.0475	12.1075	13.0757	16.5997	16.6435	2.45217e-05	0.729709	0.0141531	0.400598	78.4729	FALSE	#N/A
LOC547349	3.84737	1.5702	5.32e-48	8.36e-38	5.76e-37	2.66e-42	0.140405	122.823	0.48663	2.7845	5.41757	TRUE	#N/A
Rp1	0	0	0	0	0	0	#DIV/0!	#DIV/0!	#DIV/0!	#DIV/0!	0	#DIV/0!	#N/A
Ssu2	8.5502	8.67424	1.89271	1.6861	0	0	5.18561e-05	#NUM!	0.00331635	#NUM!	20.8033	#NUM!	#N/A
Spock1	0	0	0	0.36624	2.18765	2.15588	5.34951e-05	#DIV/0!	0.00843511	3.56801	4.70977	#DIV/0!	neuron migration
Cntf	9.3e-24	0.764222	0	0.268874	0	2.6e-32	0.42265	104.535	0.42265	103.028	1.0331		#N/A
Oprk1	0	0	0	0	0	0	#DIV/0!	#DIV/0!	#DIV/0!	#DIV/0!	0		#N/A
Npbwr1	0	0	0	0	0	0	#DIV/0!	#DIV/0!	#DIV/0!	#DIV/0!	0		#N/A
Foxp3	0.0912102	0	0	0	0	2.49e-14	0.42265	41.7362	0.42265	#DIV/0!	0.0912102		#N/A
Fam150a	0	0	0	0	0	0	#DIV/0!	#DIV/0!	#DIV/0!	#DIV/0!	0		#N/A
1700020A23Rik	0.993747	1.02482	0	0	0	0	0.000236879	#NUM!	#DIV/0!	#DIV/0!	2.01857		#N/A
Trafd1	34.7309	35.0251	29.7203	38.5636	48.2479	48.5623	0.000253208	0.472842	0.0842435	0.503614	234.85		#N/A
Ugt1a1	0.39565	8.47e-10	1.05e-08	1.1e-07	5.23e-11	7.86e-12	0.42265	32.6147	0.349745	10.9679	0.39565		#N/A
Ugt1a6a	2.15e-09	4.57e-10	0.298108	4.32e-08	2.29e-11	0.173915	0.42265	25.9914	0.753409	0.777453	0.472023		#N/A
Gm21949	2.77e-14	2.4e-15	9.62e-17	4.99e-09	8.54e-08	2.53e-08	0.206824	21.8104	0.221719	4.47147	1.1569e-07		#N/A
Sntg1	0	0	0	0	0	0	#DIV/0!	#DIV/0!	#DIV/0!	#DIV/0!	0		#N/A
Exoc4	13.2464	13.2305	13.8858	16.6201	16.4791	16.3595	0.000359493	0.310658	0.483821	0.106304	89.8214		#N/A
4930552P12Rik	0.694063	0.667266	0	0.703288	0	0	0.000387252	#NUM!	0.42265	#NUM!	2.06462		#N/A
Mcmdc2	0	0	0	0.343099	0	0	#DIV/0!	#DIV/0!	0.42265	#NUM!	0.343099		#N/A
Pcdha5	9.73e-11	6.6e-08	1.53e-10	1.12e-07	0.109297	0.0223843	0.268974	20.926	0.268974	20.1632	0.131681		#N/A
Fahd2a	0	0	0	0.263331	1.3142	1.26241	0.000403767	#DIV/0!	0.0131937	3.29052	2.83994		#N/A
Ppp1r42	0	0	0	0	0	0	#DIV/0!	#DIV/0!	#DIV/0!	#DIV/0!	0		#N/A
9230116L04Rik	0	0.438374	0	0	0	5.36e-07	0.42265	19.6415	0.42265	#DIV/0!	0.438375		#N/A
Insl3	1.73e-05	2.78e-14	3.42e-21	7.87646	5.53e-107	9.52689	0.42265	19.0709	0.906008	0.274458	17.4034		#N/A
Naip7	1.83e-06	8.81e-08	0	0.0887915	0.670263	0.222845	0.184031	18.8288	0.219903	3.33034	0.981901		#N/A
Snord87	0	0	0	0	0	0	#DIV/0!	#DIV/0!	#DIV/0!	#DIV/0!	0		#N/A
Cpa6	0	0	0	0	0	0	#DIV/0!	#DIV/0!	#DIV/0!	#DIV/0!	0		#N/A
Pcdha6	8.86e-11	5.79e-08	1.34e-10	9.77e-08	0.00311918	0.00240609	0.0162518	16.5399	0.0162521	15.7853	0.00552543		#N/A
Pcdha8	8.86e-11	5.79e-08	1.34e-10	9.77e-08	0.00311918	0.00240609	0.0162518	16.5399	0.0162521	15.7853	0.00552543		#N/A
Pcdha10	8.86e-11	5.79e-08	1.34e-10	0.214506	0.00311918	0.00240609	0.0162518	16.5399	0.432695	5.27883	0.220031		#N/A
2610203C22Rik	0	0	0	0	0	0	#DIV/0!	#DIV/0!	#DIV/0!	#DIV/0!	0		#N/A
3110035E14Rik	0	0	0	0	0	0	#DIV/0!	#DIV/0!	#DIV/0!	#DIV/0!	0		#N/A
Pcdha1	8.72e-11	5.67e-08	1.32e-10	9.55e-08	0.00172861	0.00166163	0.000390113	15.8655	0.000390122	15.1135	0.00339039		#N/A
Mir6341	0	0	0	0	0	0	#DIV/0!	#DIV/0!	#DIV/0!	#DIV/0!	0		#N/A
Hbegf	57.3026	55.8878	85.241	81.4322	91.8808	92.9139	0.000598029	0.707172	0.0442987	0.148901	464.658	FALSE	wound healing"
Gpr81	1.65199	1.73723	0.8177	0.784497	0	0	0.00063194	#NUM!	0.000429184	#NUM!	4.99142		#N/A
Naip6	0.244606	0.196005	0	0.143105	5.17e-06	3.19e-06	0.0119497	15.6856	0.422672	14.0632	0.583724		#N/A
Pcdha12	8.59e-11	5.55e-08	1.29e-10	9.34e-08	0.000958652	0.00114801	0.00798317	15.2099	0.00798346	14.4592	0.00210681		#N/A
Rpl26	39.0726	0.00145071	0.0022511	0.00142894	0.00222868	0.00159347	0.422659	13.3195	0.90373	0.054663	39.0816		#N/A
Lgals6	1.5e-06	0.000154026	0.00564094	0.012388	0	0.827184	0.422722	12.3768	0.431144	5.51982	0.845368		#N/A
Xkr9	0	0	0	0	0	0	#DIV/0!	#DIV/0!	#DIV/0!	#DIV/0!	0		#N/A
Hbb-bs	82.7824	0.0176915	0.0320431	0.01801	0	0.0189007	0.422573	12.097	0.316741	1.40502	82.869		#N/A
Gm5523	0	0	0	0	0	0	#DIV/0!	#DIV/0!	#DIV/0!	#DIV/0!	0		#N/A
ChkbCpt1b	0.000162525	1.09703	2.86e-06	0.00707561	0.000392207	5.01e-16	0.422673	11.4499	0.444854	4.17375	1.10466		#N/A
Rmnd1	2.32141	0.000388621	2.04905	0.98043	0.000649982	0.000376004	0.422691	11.144	0.105222	11.5278	5.3523		#N/A
Arsa	20.7101	20.3929	33.971	35.0485	38.4067	39.3777	0.000774601	0.920237	0.0263095	0.172477	187.907		#N/A
Trpa1	0	0	0	0	0	0	#DIV/0!	#DIV/0!	#DIV/0!	#DIV/0!	0		#N/A
Kcnb2	0	0	0	0	0	0	#DIV/0!	#DIV/0!	#DIV/0!	#DIV/0!	0		#N/A
Clrn1	0.337769	0.357541	0	0	0	0	0.00080764	#NUM!	#DIV/0!	#DIV/0!	0.69531		#N/A
Pcdhac1	7.7e-11	4.77e-08	1.11e-10	7.98e-08	1.58e-05	8.73e-05	0.286221	11.0754	0.28633	10.3334	0.000103228		#N/A
Sap25	2.92982	4.4106	0.0663501	0.0029157	1.19e-09	0.00537234	0.0384215	10.4161	0.42125	3.68852	7.41506		#N/A
4930444P10Rik	0	0	0	0	0	0	#DIV/0!	#DIV/0!	#DIV/0!	#DIV/0!	0		#N/A
Raet1c	1.23298	1.06e-05	1.6394	0.00138516	0.000897845	8.34e-05	0.42295	10.2953	0.42223	10.7075	2.87476		#N/A
Rnf144b	6.30861	6.46552	4.25587	4.39621	3.79021	3.81383	0.000940639	0.748387	0.0179442	0.186281	29.0302		#N/A
D030040B21Rik	0	0	0	0	0	0	#DIV/0!	#DIV/0!	#DIV/0!	#DIV/0!	0		#N/A
Fgf23	0.254718	0.204075	26.078	37.4225	155.329	171.964	0.00258054	9.47852	0.00577572	2.36574	391.252		#N/A
Jmjd7-pla2g4b	0.00013662	0.00015459	4.18e-05	0.476226	0.171599	0.0314582	0.284868	9.44561	0.637304	1.22989	0.679616		#N/A
Gdap1	0	0	0.224805	0	0	0	#DIV/0!	#DIV/0!	0.42265	#NUM!	0.224805		#N/A
Pcdha4	7.2e-11	4.35e-08	1.01e-10	7.25e-08	1.26e-06	1.79e-05	0.369483	8.78048	0.370063	8.04389	1.92762e-05		#N/A
Nkpd1	0.374429	0.399981	0.329726	0.210763	0	0	0.00108692	#NUM!	0.0451868	#NUM!	1.3149		#N/A
9430076C15Rik	0.33783	0.360893	0.148687	0.0950743	0	0	0.00108771	#NUM!	0.0451243	#NUM!	0.942484		#N/A
Lrrc4c	0.294843	0.314997	0.389109	0.165923	0	0	0.00109039	#NUM!	0.130728	#NUM!	1.16487		#N/A
Plcb3	11.615	11.2559	10.8676	12.3879	16.7703	16.8301	0.00114922	0.554965	0.0209536	0.530906	79.7268		#N/A
Defb44-ps	0	0	0	0	0	0	#DIV/0!	#DIV/0!	#DIV/0!	#DIV/0!	0		#N/A
Defb18	0	0	0	0	0	0	#DIV/0!	#DIV/0!	#DIV/0!	#DIV/0!	0		#N/A
Crisp4	0	0	0	0	0	0	#DIV/0!	#DIV/0!	#DIV/0!	#DIV/0!	0		#N/A
Gpm6a	0.115163	0	3.49813	4.2788	29.4701	20.0151	0.0347802	8.74718	0.0480423	2.66972	57.3773	TRUE	neuron migration
Tfap2d	0	0	0	0	0	0	#DIV/0!	#DIV/0!	#DIV/0!	#DIV/0!	0		#N/A
Defb41	0	0	0	0	0	0	#DIV/0!	#DIV/0!	#DIV/0!	#DIV/0!	0		#N/A
Gm15386	0	0	0	0	0	0	#DIV/0!	#DIV/0!	#DIV/0!	#DIV/0!	0		#N/A
Mir206	0	0	0	0	0	0	#DIV/0!	#DIV/0!	#DIV/0!	#DIV/0!	0		#N/A
Oas2	9.9077	7.17248	1.49048	1.90749	0	0.0705921	0.0249125	7.9186	0.0157756	5.58902	20.5487		#N/A
Il17a	0	0	0	0	0	0	#DIV/0!	#DIV/0!	#DIV/0!	#DIV/0!	0		granulocyte migration
Pcdha9	6.86e-11	4.07e-08	9.5e-11	0.103175	2.01e-07	5.65e-06	0.397977	7.16508	0.422672	14.1061	0.103181		#N/A
Mir133b	0	0	0	0	0	0	#DIV/0!	#DIV/0!	#DIV/0!	#DIV/0!	0		#N/A
LOC101056043	10.1715	10.3214	8.29805	6.58604	5.93491	6.19128	0.00125753	0.756998	0.252143	0.295645	47.5032		#N/A
4930486I03Rik	0	0	0	0	0	0	#DIV/0!	#DIV/0!	#DIV/0!	#DIV/0!	0		#N/A
6720483E21Rik	0	0	0	0	0	0	#DIV/0!	#DIV/0!	#DIV/0!	#DIV/0!	0		#N/A
Ltbp2	1.14313	0.517737	8.38188	14.9329	93.7031	130.322	0.0260712	7.07558	0.0326776	3.26434	249.001		#N/A
D030025P21Rik	0.254469	0	0.895131	2.07647	15.0484	18.3271	0.00971492	7.03516	0.0128854	3.48948	36.6016		#N/A
Gm4956	0	0	0.44882	0.285164	0	0	#DIV/0!	#DIV/0!	0.0462906	#NUM!	0.733984		#N/A
Tbx2	6.63103	6.52737	9.37504	9.27642	3.83863	4.00074	0.00130611	0.747174	0.000307857	1.25048	39.6492		#N/A
Ackr1	2.00262	2.673	159.416	190.461	306.206	297.489	0.000212949	7.01252	0.0157592	0.786972	958.248		#N/A
Tubgcp6	3.48507	3.50963	2.60587	2.62326	3.87729	3.8651	0.00134208	0.146517	7.13942e-05	0.566208	19.9662		#N/A
Btnl9	48.872	46.7141	18.8003	10.109	0.591193	0.228674	0.000532716	-6.86527	0.0839974	-5.14	125.315		#N/A
Rbp7	133.319	123.692	32.0894	12.483	0	0	0.00140012	#NUM!	0.15089	#NUM!	301.583		#N/A
Khdc1b	0	0	0.20594	0	0	0	#DIV/0!	#DIV/0!	0.42265	#NUM!	0.20594		#N/A
Khdc1c	0	0	0	0	0	0	#DIV/0!	#DIV/0!	#DIV/0!	#DIV/0!	0		#N/A
Mir30a	0	0	0	0	0	0	#DIV/0!	#DIV/0!	#DIV/0!	#DIV/0!	0		#N/A
Eps8l2	14.7886	10.9578	3.08296	4.50608	0.155446	0.0902941	0.021837	6.71109	0.0356368	4.94871	33.5812		#N/A
Rims1	0	0	0	0	0	0	#DIV/0!	#DIV/0!	#DIV/0!	#DIV/0!	0		#N/A
4933415F23Rik	0	0	0	0	0	0	#DIV/0!	#DIV/0!	#DIV/0!	#DIV/0!	0		#N/A
Mir30c-2	0	0	0	0	0	0	#DIV/0!	#DIV/0!	#DIV/0!	#DIV/0!	0		#N/A
Selp	7.86901	5.20149	313.105	415.607	525.779	657.06	0.0123671	6.4998	0.112305	0.698833	1924.62	TRUE	leukocyte tethering or rolling
Klhdc7a	2.36426	1.4885	0.519282	0	0	0.0457367	0.0491803	6.3964	0.45955	3.50509	4.41778		#N/A
Slx4	1.55653	1.52439	1.89938	1.11909	2.33357	2.38879	0.00151169	0.616147	0.16127	0.645691	10.8217		#N/A
Magix	8.68554	7.14874	2.45841	3.03817	0	0.201419	0.00968742	6.29671	0.0131699	4.77026	21.5323		#N/A
Gm16548	1.22809	1.22946	48.5629	62.542	97.5566	92.0694	0.000858375	6.26979	0.0346862	0.771234	303.188		#N/A
Olr1	0.18912	0	0.499107	0.319306	7.13501	6.60482	0.0017212	6.18292	0.00187197	4.06939	14.7474		#N/A
Plcb1	18.7109	18.781	22.2097	17.0932	9.11501	9.85094	0.00158854	0.983167	0.0589503	1.05122	95.7607		#N/A
4931408C20Rik	0	0	0	0	0	0	#DIV/0!	#DIV/0!	#DIV/0!	#DIV/0!	0		#N/A
Sema3g	76.6462	84.3952	32.7851	23.2127	1.40402	0.964586	0.00238411	-6.08725	0.0304747	-4.56326	219.408	FALSE	neural crest cell migration
Gm597	0	0	0	0	0	0	#DIV/0!	#DIV/0!	#DIV/0!	#DIV/0!	0		#N/A
Mir6342	0	0	0	0	0	0	#DIV/0!	#DIV/0!	#DIV/0!	#DIV/0!	0		#N/A
Bai3	0	0	0	0	0	0	#DIV/0!	#DIV/0!	#DIV/0!	#DIV/0!	0		#N/A
Gm20172	0	0	0	0	0	0	#DIV/0!	#DIV/0!	#DIV/0!	#DIV/0!	0		#N/A
Pih1d3	0	0	0	0	0	0	#DIV/0!	#DIV/0!	#DIV/0!	#DIV/0!	0		#N/A
Gm4850	0	0	0	0	0	0	#DIV/0!	#DIV/0!	#DIV/0!	#DIV/0!	0		#N/A
Npcd	8.75e-06	0.00360951	1.45031	0.227929	0.106939	0.138906	0.0171841	6.08631	0.362102	2.77113	1.9277		#N/A
4931428L18Rik	0	0	0	0	0	0	#DIV/0!	#DIV/0!	#DIV/0!	#DIV/0!	0		#N/A
Lgsn	0	0	0	0	0	0	#DIV/0!	#DIV/0!	#DIV/0!	#DIV/0!	0		#N/A
1700001G17Rik	0	0	0	0	0	0	#DIV/0!	#DIV/0!	#DIV/0!	#DIV/0!	0		#N/A
Mycbp2	10.7277	10.5296	13.8419	14.1587	16.6103	16.183	0.00166274	0.625443	0.0120951	0.227943	82.0512		#N/A
Ugt1a10	2.71e-09	7.58e-10	1.01e-08	9.32e-08	4.51e-11	6.65e-12	0.222259	6.0664	0.339986	10.963	1.0682e-07		#N/A
Col4a4	0.292768	0.268113	0	0.0705926	0	0	0.00192669	#NUM!	0.42265	#NUM!	0.631474		#N/A
Ndufaf5	0.377541	0.403304	0.498718	0.637549	0.704029	0.715256	0.00193199	0.862056	0.179225	0.320862	3.3364		#N/A
Slc26a10	35.7581	28.5201	6.2771	4.94392	0.885978	0.128425	0.012976	5.98563	0.0218338	3.4675	76.5136		#N/A
Aqp7	69.3909	49.6605	20.6593	11.3482	1.72673	0.222666	0.027386	-5.93241	0.0859563	-4.03731	153.008		#N/A
Wdr13	6.09458	5.97679	6.66218	7.69243	9.13121	8.89529	0.00195493	0.57853	0.0737976	0.328605	44.4525		#N/A
Khdrbs2	0	0	0	0	0	0	#DIV/0!	#DIV/0!	#DIV/0!	#DIV/0!	0		#N/A
Gm9839	0	0	0	0	0	0	#DIV/0!	#DIV/0!	#DIV/0!	#DIV/0!	0		#N/A
Gm5415	0	0	0	0	0	0	#DIV/0!	#DIV/0!	#DIV/0!	#DIV/0!	0		#N/A
Slc38a2	33.7913	32.779	27.8705	27.7335	21.6855	21.9023	0.00202293	0.610954	0.000455203	0.351264	165.762		#N/A
Mir5103	0	0	0	0	0	0	#DIV/0!	#DIV/0!	#DIV/0!	#DIV/0!	0		#N/A
Ugt1a9	3e-09	9.47e-10	1.09e-08	1.31e-07	6.07e-11	9.3e-12	0.199657	5.81726	0.35904	10.9852	1.45917e-07		#N/A
Prss40	0	0	0	0	0	0	#DIV/0!	#DIV/0!	#DIV/0!	#DIV/0!	0		#N/A
Prss39	0	0	0	0	0	0	#DIV/0!	#DIV/0!	#DIV/0!	#DIV/0!	0		#N/A
Gipc3	11.6521	5.90933	0	1.64228	0	0.314541	0.095535	5.80302	0.51042	2.38438	19.5183		#N/A
Cfc1	0	0	0	0	0	0	#DIV/0!	#DIV/0!	#DIV/0!	#DIV/0!	0		#N/A
Klrb1f	0	0	0	0	0.330731	0.362307	0.00206943	#DIV/0!	0.00206943	#DIV/0!	0.693038		#N/A
Amer3	0	0	0	0	0	0	#DIV/0!	#DIV/0!	#DIV/0!	#DIV/0!	0		#N/A
Ugt1a5	3.09e-09	1.01e-09	1.11e-08	1.45e-07	6.65e-11	1.03e-11	0.192858	5.73837	0.364106	10.9891	1.60277e-07		#N/A
AA619741	0	0	0	0	0	0	#DIV/0!	#DIV/0!	#DIV/0!	#DIV/0!	0		#N/A
Mir7669	0	0	0	0	0	0	#DIV/0!	#DIV/0!	#DIV/0!	#DIV/0!	0		#N/A
Ear3	0.000115027	1.86e-06	0.669053	2.03045	2.19e-06	0	0.417553	5.73804	0.185852	20.2333	2.69962		#N/A
Vwf	14.9246	18.5149	163.452	258.77	668.742	1094.92	0.0556577	5.72088	0.0916471	2.0625	2219.32		#N/A
Frzb	0	0	0.309361	0	1.47399	1.61689	0.00213064	#DIV/0!	0.0146796	3.32065	3.40024		#N/A
Ugt1a2	3.12e-09	1.03e-09	1.12e-08	1.49e-07	6.81e-11	1.06e-11	0.190875	5.7206	0.36516	10.9912	1.64429e-07		#N/A
Dlk2	0.525693	0.577686	0	0	0	0	0.00221308	#NUM!	#DIV/0!	#DIV/0!	1.10338		#N/A
Mir6897	0	0	0	0	0	0	#DIV/0!	#DIV/0!	#DIV/0!	#DIV/0!	0		#N/A
Tubg1	5.43672	5.62511	9.90895	7.65534	7.94375	8.08477	0.00223738	0.535051	0.566586	0.132004	44.6546		#N/A
Nckap5l	13.7486	14.3596	10.0098	7.73641	7.3539	7.50177	0.00224255	0.919977	0.332201	0.256497	60.7101		#N/A
Agtr1a	9.02522	3.79904	10.1127	3.35868	0	0.248336	0.138116	5.69044	0.189557	5.76146	26.544	TRUE	cell chemotaxis
Lmf2	27.3154	26.8845	23.1674	19.6827	22.0602	22.2757	0.00237709	0.289815	0.711844	0.0491768	141.386		#N/A
Mme	0.172895	0.0461682	1.10922	0.568313	6.84367	4.33162	0.048872	5.67282	0.0660303	2.7359	13.0719		#N/A
Mir6898	0	0	0	0	0	0	#DIV/0!	#DIV/0!	#DIV/0!	#DIV/0!	0		#N/A
Rspo3	0.145149	0	0.383726	0.36771	4.67169	2.47441	0.0863174	5.62155	0.100576	3.24943	8.04269		#N/A
Tet3	15.4817	16.0016	12.7937	10.2309	8.49595	8.95959	0.00245693	0.850902	0.165914	0.399491	71.9634		#N/A
Rtca	6.10282	6.20451	5.60196	7.33768	9.22101	8.94765	0.00246693	0.561934	0.0967995	0.489655	43.4156		#N/A
Pcdha11	8.59e-11	0.100931	1.29e-10	9.34e-08	0.000958652	0.00114801	0.430768	5.58227	0.00798346	14.4592	0.103038		#N/A
Rsc1a1	9.67e-06	3.43e-05	1.37e-05	5.14e-05	0.000259055	0.00169363	0.31483	5.4728	0.318958	4.90666	0.00206176		#N/A
4933424G06Rik	0	0	0	0	0	0	#DIV/0!	#DIV/0!	#DIV/0!	#DIV/0!	0		#N/A
Tiam2	0.0536246	0	0	0.572561	1.7075	0.549561	0.19769	5.39541	0.322112	1.97894	2.88325		#N/A
Pcdh7	1.50771	0.565706	11.2789	18.9604	38.97	47.7966	0.0108075	5.38706	0.0402772	1.52072	119.079		#N/A
Tacr1	0.197882	0.0528526	3.39118	3.67446	3.59155	6.21613	0.0680213	5.28968	0.408032	0.473092	17.1241		#N/A
Hdac9	1.08166	1.17982	1.12288	1.28971	2.25777	2.20185	0.00263091	0.979654	0.00730738	0.886338	9.13369		#N/A
Vldlr	0.277541	0.0952951	1.14896	1.47242	7.91093	6.62784	0.00826585	5.28522	0.0121051	2.47151	17.533		#N/A
Icam5	0.229032	3.39476	0.45364	0.966847	0	0.0929901	0.380918	5.28428	0.125872	3.93316	5.13727		#N/A
Pcdha2	6.47e-11	3.75e-08	8.77e-11	6.21e-08	2.19e-08	1.41e-06	0.421065	5.25241	0.428166	4.52516	1.53165e-06		#N/A
Col28a1	1.02708	1.13947	0.41679	0.93366	0	0	0.00268021	#NUM!	0.120564	#NUM!	3.517		#N/A
Mir6896	0	0	0	0	0	0	#DIV/0!	#DIV/0!	#DIV/0!	#DIV/0!	0		#N/A
Pkhd1l1	0.0507392	0	0.100193	0.0642238	1.20286	0.680424	0.0731531	5.21401	0.0816165	3.51782	2.09844		#N/A
Sox4	24.5337	24.1995	18.7963	12.7018	32.1988	31.4801	0.0028006	0.38591	0.0344942	1.01555	143.91		#N/A
Cdh23	1.60664	1.03	0.346119	0.369743	0	0.071206	0.0476564	5.21056	0.0132743	3.32961	3.42371		#N/A
Bst1	1.04466	1.67384	12.4295	14.9969	50.5444	48.4569	0.000512371	5.18656	0.00213045	1.85188	129.146		#N/A
Lyg2	0	0	0	0	0	0	#DIV/0!	#DIV/0!	#DIV/0!	#DIV/0!	0		#N/A
Unc5c	0.0349781	0	1.01336	0.088553	0.48791	0.739061	0.0423976	5.13251	0.908113	0.155091	2.36386		#N/A
Tmem108	0	0.146141	0.240651	0.0769859	2.93062	2.14807	0.0250722	5.11902	0.0270583	3.99901	5.54247		#N/A
Lyg1	0	0	0	0	0	0	#DIV/0!	#DIV/0!	#DIV/0!	#DIV/0!	0		#N/A
Nxph1	0.403093	0	1.86848	1.70251	6.4975	7.03136	0.0025873	5.06878	0.0031372	1.92164	17.5029		#N/A
Dctpp1	6.72219	6.5747	8.06414	12.6601	10.6379	10.2472	0.00301509	0.651385	0.975347	0.0111549	54.9062		#N/A
Lbp	0.822463	0.549105	11.5932	14.0055	22.8214	22.9248	4.33753e-05	5.05975	0.0140599	0.837581	72.7165	TRUE	leukocyte chemotaxis involved in inflammatory response
Olfr1396	4.50927	5.90841	1.64045	1.04012	0	0.331907	0.0197278	4.97211	0.0757402	3.01369	13.4302		#N/A
Mir6349	0	0	0	0	0	0	#DIV/0!	#DIV/0!	#DIV/0!	#DIV/0!	0		#N/A
Col13a1	17.5821	17.0175	4.83083	3.98516	0.824983	0.287449	0.000541491	4.95897	0.0165021	2.98641	44.528		#N/A
Hapln3	0	0.41491	3.09331	2.62635	4.36376	8.40077	0.0931458	4.9432	0.225142	1.15814	18.8991		#N/A
Clic5	36.3179	22.9841	14.7207	5.96936	1.48861	0.456076	0.0502993	4.93047	0.167237	3.41133	81.9367		#N/A
Masp1	0.124859	0.200069	0.824641	2.63558	4.3655	5.47441	0.0133718	4.92045	0.0952279	1.50778	13.6251		#N/A
Dsg2	1.26645	0.230634	3.2622	7.38502	21.8555	22.1227	0.000633489	4.87656	0.015019	2.04631	56.1225		#N/A
Slc12a7	43.8414	43.3552	42.9821	43.053	49.4883	49.9909	0.00322567	0.190123	0.00142237	0.20947	272.711		#N/A
Car3	2.40221	2.69383	0	1.01483	0	0	0.00325868	#NUM!	0.42265	#NUM!	6.11087		#N/A
Snord89	0	0	0	0	0	0	#DIV/0!	#DIV/0!	#DIV/0!	#DIV/0!	0		#N/A
Fam175b	3.19195	3.3151	3.74698	3.19406	2.14896	2.11188	0.00326233	0.610866	0.0401907	0.704014	17.7089		#N/A
Pygb	9.36589	9.32782	9.81537	8.79293	12.1061	12.442	0.00331768	0.393058	0.0312951	0.399665	61.8501		#N/A
Creg2	0	0	0	0	0	0	#DIV/0!	#DIV/0!	#DIV/0!	#DIV/0!	0		#N/A
Rfx8	0	0	0	0.149644	0	0	#DIV/0!	#DIV/0!	0.42265	#NUM!	0.149644		#N/A
Gm3646	0	0	0	0	0	0	#DIV/0!	#DIV/0!	#DIV/0!	#DIV/0!	0		#N/A
1700066B17Rik	0	0	0	0	0	0	#DIV/0!	#DIV/0!	#DIV/0!	#DIV/0!	0		#N/A
Gm16894	0	0	0	0	0	0	#DIV/0!	#DIV/0!	#DIV/0!	#DIV/0!	0		#N/A
Icam2	118.815	122.61	95.7664	72.8965	79.3053	81.9644	0.00332548	0.5821	0.778578	0.0646673	571.358		#N/A
Wipf3	0.163173	0.326891	0.322849	1.0332	6.44182	7.75139	0.00914872	4.85609	0.0132027	3.38772	16.0393		#N/A
Dusp26	3.09379	1.65219	1.91242	1.39385	0	0.167331	0.0874848	4.82593	0.0288375	4.30443	8.21958		#N/A
Fbxl20	4.61727	4.57941	4.58564	3.51328	4.27652	4.27503	0.00343162	0.104927	0.714006	0.0784564	25.8471		#N/A
Flrt3	0.252444	0.0674202	1.221	0.743577	5.05456	4.01589	0.0142266	4.82564	0.0249168	2.20696	11.3549	TRUE	proepicardium cell migration involved in pericardium morphogenesis
Rnase12	0	0	0	0	1.33976	1.50752	0.00345352	#DIV/0!	0.00345352	#DIV/0!	2.84728		#N/A
Slc9a4	0	0	0	0	0	0	#DIV/0!	#DIV/0!	#DIV/0!	#DIV/0!	0		#N/A
Mcf2l	57.0107	60.8773	18.7493	13.0609	2.49751	1.86871	0.00118867	-4.75489	0.0408415	-2.86503	154.064		#N/A
Usp43	1.94907	1.25694	0.296039	0.316383	0	0.12158	0.0481859	4.7208	0.0576696	2.33262	3.94001		#N/A
4930448I06Rik	0	0	0	0	0	0	#DIV/0!	#DIV/0!	#DIV/0!	#DIV/0!	0		#N/A
Msx1os	6.57544	3.469	4.02993	1.35441	0	0.390512	0.0910432	4.68489	0.206029	3.78533	15.8193		#N/A
Sele	12.6876	8.84751	207.266	205.118	269.391	282.933	0.000702511	4.68075	0.00946398	0.421526	986.243	TRUE	leukocyte tethering or rolling
Pou3f3os	0	0	0	0	0	0	#DIV/0!	#DIV/0!	#DIV/0!	#DIV/0!	0		#N/A
Clec4e	0	0.110106	0	0.116048	2.69186	0.111573	0.406503	4.67023	0.407391	4.5944	3.02959		#N/A
Pou3f3	0	0	0	0	0	0	#DIV/0!	#DIV/0!	#DIV/0!	#DIV/0!	0		cerebral cortex radially oriented cell migration
2900092D14Rik	0	0	0	0	0	0	#DIV/0!	#DIV/0!	#DIV/0!	#DIV/0!	0		#N/A
2610207O16Rik	0	0	0	0	0	0	#DIV/0!	#DIV/0!	#DIV/0!	#DIV/0!	0		#N/A
Pxmp2	0.390789	0	3.12561	2.31335	5.50788	4.43053	0.014104	4.66855	0.0793635	0.869684	15.7682		#N/A
Gpr45	0	0	0	0	0	0	#DIV/0!	#DIV/0!	#DIV/0!	#DIV/0!	0		#N/A
Git2	21.5116	21.2051	15.6014	14.9343	13.6794	14.5044	0.00364732	0.599934	0.156951	0.115631	101.436		#N/A
Timm44	6.45357	6.94678	7.7458	8.68831	10.7419	10.7992	0.00369949	0.684821	0.0325269	0.390399	51.3756		#N/A
F8	1.25544	0.754851	11.5143	7.95212	30.105	21.0049	0.0327705	4.66813	0.083591	1.39262	72.5866		#N/A
Adamtsl2	1.15182	1.00675	0.55288	0	0	0.0850365	0.00651246	4.66585	0.490961	2.70081	2.79649		#N/A
Penk	3.68918	1.68851	3.49737	1.33606	0	0.213665	0.12416	4.65356	0.167252	4.49962	10.4248		#N/A
Zbtb7a	23.4435	22.6799	16.5449	17.5537	15.9767	16.3471	0.00376109	0.512902	0.240432	0.0771157	112.546		#N/A
Scube3	2.63387	2.0185	0.45364	1.06353	0	0.18598	0.0200943	4.64475	0.172067	3.02816	6.35552		#N/A
Gpr126	0.302848	0.404454	2.12812	2.42814	9.08661	8.44861	0.00147062	4.63179	0.00293771	1.94433	22.7988		#N/A
A430090L17Rik	0.730624	1.09763	0.361496	0.23129	0	0.0741776	0.0426704	4.62334	0.0743068	2.99846	2.49522		#N/A
Fras1	0.121964	0.276918	0	0.0857629	0	0.0165217	0.133606	4.59353	0.511012	2.37599	0.501167		#N/A
Timp4	14.9706	11.3598	4.18285	5.10463	1.10638	0	0.021689	4.57281	0.0296143	3.06944	36.7243		#N/A
Kcnj8	36.5658	12.5912	26.5127	10.6998	0	2.08273	0.189605	4.56085	0.158522	4.15924	88.4522		#N/A
Mettl21e	0	0	0	0	0	0	#DIV/0!	#DIV/0!	#DIV/0!	#DIV/0!	0		#N/A
Tgfbi	11.0592	3.19385	58.6106	62.9767	170.512	160.475	0.00161693	4.53743	0.0027211	1.44478	466.827		#N/A
Sfmbt2	0.736245	0.0334573	0	0.246907	0	0.0339289	0.405451	4.50371	0.482825	2.86338	1.05054		#N/A
Ldb3	0	0.0562033	0.832574	0.410046	0.685795	0.58766	0.00852132	4.50195	0.949798	0.0353628	2.57228		#N/A
Gm4776	0	0	0	0	0	0	#DIV/0!	#DIV/0!	#DIV/0!	#DIV/0!	0		#N/A
Rgcc	336.966	223.454	86.3015	45.9285	14.5698	10.1681	0.0421473	4.50171	0.118006	2.41825	717.388		#N/A
B4galt6	0.908064	0.591194	2.39339	4.64633	18.4574	15.2631	0.0097794	4.49131	0.0207966	2.26004	42.2595		#N/A
Wnt9b	0	0.0590636	0.0971991	0.49776	0.51469	0.778453	0.0447749	4.45247	0.282734	1.12002	1.94717		#N/A
Dnah7b	0	0	0.0691189	0	0	0	#DIV/0!	#DIV/0!	0.42265	#NUM!	0.0691189		#N/A
Alas2	2.50986	0.727584	0.48684	1.39821	0	0.149206	0.226361	4.43948	0.200917	3.65923	5.2717		#N/A
Mir6350	0	0	0	0	0	0	#DIV/0!	#DIV/0!	#DIV/0!	#DIV/0!	0		#N/A
1700097N02Rik	0	0	0	0	0.702796	0.804257	0.00450195	#DIV/0!	0.00450195	#DIV/0!	1.50705		#N/A
Esm1	40.5495	31.2767	15.516	5.37751	3.0502	0.271983	0.0193886	4.43431	0.236582	2.65285	96.0419		#N/A
Akap5	0.343508	0.39322	0.129307	0.62123	0	0	0.00452225	#NUM!	0.266601	#NUM!	1.48727		#N/A
Atxn7	7.60649	7.43681	5.60934	6.90403	5.87456	5.71427	0.00453467	0.376386	0.551986	0.110735	39.1455		#N/A
9330175M20Rik	0	0	0	0	0	0	#DIV/0!	#DIV/0!	#DIV/0!	#DIV/0!	0		#N/A
Kcna5	26.9174	19.2003	8.69804	7.28763	0.952728	1.19895	0.029483	4.42179	0.010542	2.89325	64.255		#N/A
Tarm1	0	0	0	0	0.596781	0.684921	0.00469575	#DIV/0!	0.00469575	#DIV/0!	1.2817		#N/A
Pcdh20	0.69514	0.405092	0.166599	0.0533382	0	0.0513416	0.0706126	4.42154	0.307967	2.09889	1.37151		#N/A
Dcaf12l2	0	0	0	0	0.332344	0.289488	0.00471624	#DIV/0!	0.00471624	#DIV/0!	0.621832		#N/A
Itih3	0	0	0.160806	0	2.0431	1.77944	0.00472388	#DIV/0!	0.00703814	4.57114	3.98335		#N/A
Lancl3	0.855995	0.617275	0	0.216775	0	0.0695288	0.0299704	4.40527	0.584078	1.64052	1.75957		#N/A
Shisa6	0.611348	0.139966	0.287609	0.700201	0	0.0354841	0.269155	4.40417	0.148182	4.79899	1.77461		#N/A
Matk	0	0.155287	0	0	2.44731	0.786512	0.206239	4.38023	0.190889	#DIV/0!	3.38911		#N/A
1700019A02Rik	0	0	0	0	0	0	#DIV/0!	#DIV/0!	#DIV/0!	#DIV/0!	0		#N/A
Qrfpr	0	0	0	0	0.55859	0.485037	0.00493048	#DIV/0!	0.00493048	#DIV/0!	1.04363		#N/A
Gsdma2	0	0	0	0	0.610544	0.52977	0.00498013	#DIV/0!	0.00498013	#DIV/0!	1.14031		#N/A
Hs3st6	0	0	1.24989	0.794674	0.881364	1.01588	0.00498932	#DIV/0!	0.785644	0.107888	3.94181		#N/A
Kcnma1	0.0546508	0	0.353812	0	1.0298	0.0888355	0.376159	4.35535	0.526237	1.66069	1.5271		#N/A
Ppp1r13b	24.8822	24.8133	28.5469	27.4406	31.9533	33.0408	0.00503507	0.387194	0.0284089	0.215204	170.677		#N/A
Gdpd5	12.0499	11.5405	10.1861	7.47034	7.49786	7.79886	0.00505108	0.624978	0.478827	0.206972	56.5436		#N/A
Efna1	27.3757	26.5123	16.1767	15.5611	20.2601	19.7784	0.00505757	0.428576	0.00875145	0.335186	125.664	FALSE	cell migration
F5	0.0883179	0	0.40719	0.931684	0.677751	1.11238	0.0616991	4.34122	0.575798	0.419045	3.21732		#N/A
Klk1b16	0	0	0	0	0.379858	0.438567	0.0051064	#DIV/0!	0.0051064	#DIV/0!	0.818425		#N/A
Pde1c	0.15714	0.0314759	0.11539	0.288789	2.73303	0.986415	0.181301	4.30156	0.199511	3.20202	4.31224		#N/A
Eif3j1	0.449496	0.371606	0.59548	0.3854	0.638315	15.3993	0.410959	4.28775	0.415054	4.03124	17.8396		#N/A
Extl1	0.813509	0.0651825	4.93573	2.60946	9.09033	8.06184	0.00605344	4.28689	0.063492	1.18476	25.5761		#N/A
Cd80	0.212738	0	0	0.179717	3.57942	0.517744	0.33311	4.26748	0.329726	4.51083	4.48962		#N/A
Mir7681	0	0	0	0	0	0	#DIV/0!	#DIV/0!	#DIV/0!	#DIV/0!	0		#N/A
2810032G03Rik	0	0	0	0	0.849267	0.734489	0.00521117	#DIV/0!	0.00521117	#DIV/0!	1.58376		#N/A
Pcdh9	0.181551	0	0.636108	0.49835	2.24759	1.23265	0.0853713	4.26074	0.149143	1.61718	4.79625		#N/A
Ube2d2b	0	0	0	0	0.316163	0.36567	0.00523069	#DIV/0!	0.00523069	#DIV/0!	0.681833		#N/A
Bpifb5	0	0	0.588708	0.187636	0.311495	0.360318	0.00523996	#DIV/0!	0.820045	0.208636	1.44816		#N/A
Sh3rf2	0.0708999	0	0.457801	0.478959	0.77675	0.576223	0.0264353	4.25421	0.175048	0.530382	2.36063		#N/A
Egfl8	1.34071	3.75796	3.12164	1.70014	0	0.271581	0.185636	4.23067	0.0880092	4.15011	10.192		#N/A
Boll	0	0	0	0	0	0	#DIV/0!	#DIV/0!	#DIV/0!	#DIV/0!	0		#N/A
Dok5	0	0	0	0.17156	0.284682	0.329547	0.00529293	#DIV/0!	0.129924	1.84006	0.785789		#N/A
Calml4	0.61899	0	0	3.69881	6.69683	4.91025	0.0283563	4.22895	0.194069	1.64987	15.9249		#N/A
9130227L01Rik	0	0	0	0	0	0	#DIV/0!	#DIV/0!	#DIV/0!	#DIV/0!	0		#N/A
Hsfy2	0	0	0	0	0	0	#DIV/0!	#DIV/0!	#DIV/0!	#DIV/0!	0		#N/A
Lrrn3	0	0.077516	0.255421	0.40882	0.81141	0.628786	0.0205458	4.21563	0.0828953	1.11649	2.18195		#N/A
Trpm3	1.34856	1.40974	0.677182	0.563185	0	0.149815	0.00382666	4.20253	0.0285297	3.04951	4.14848		#N/A
Pcsk7	11.4404	11.2463	13.517	11.2963	14.4407	14.8898	0.00537915	0.370555	0.184354	0.241288	76.8305		#N/A
Dyrk3	0	0	0	0	0.238547	0.276493	0.00538433	#DIV/0!	0.00538433	#DIV/0!	0.51504		#N/A
BC055402	0	0	0	0	0	0	#DIV/0!	#DIV/0!	#DIV/0!	#DIV/0!	0		#N/A
Gja5	13.5727	15.2657	14.5317	4.04841	1.21869	0.35396	0.00482615	4.19672	0.247301	3.56249	48.9912		#N/A
Aox3	0	0	0	0.0646023	0	0	#DIV/0!	#DIV/0!	0.42265	#NUM!	0.0646023		#N/A
Nnmt	4.24717	2.04044	2.83413	2.87395	0	0.343827	0.116934	4.19276	0.00413758	4.05325	12.3395		#N/A
Bche	0.0529633	0	0	0.1341	0.960922	0	0.445038	4.18135	0.483875	2.84111	1.14799		#N/A
Mfsd7c	1.37836	1.49879	0	0.415578	0	0.15992	0.00538434	4.16922	0.623837	1.37777	3.45265		#N/A
2210404O09Rik	0	0	0	0.266442	0.220832	0.256086	0.00541985	#DIV/0!	0.515562	0.83992	0.74336		#N/A
Aox2	0	0	0.0917208	0	0	0	#DIV/0!	#DIV/0!	0.42265	#NUM!	0.0917208		#N/A
Gpbar1	1.62093	4.21828	0.540457	0.685444	0	0.328116	0.169925	4.1535	0.129381	1.90156	7.39323		#N/A
Fxn	2.85925	2.28972	2.85532	0.604376	0	0.289528	0.0168502	4.15251	0.297271	3.57887	8.89819		#N/A
Fbxo40	0	0	0	0.116099	0.192359	0.223243	0.00547687	#DIV/0!	0.130203	1.83985	0.531701		#N/A
Aloxe3	0	0	0.360258	0	0.190703	0.221332	0.00548044	#DIV/0!	0.899254	0.193736	0.772293		#N/A
Ccdc60	0	0	0.530338	0.11297	1.68443	1.95516	0.00548759	#DIV/0!	0.0264773	2.50019	4.2829		#N/A
4930562C15Rik	0.350996	0.914006	0	0	0	0.0712734	0.170123	4.14963	0.42265	#DIV/0!	1.33628		#N/A
Foxl1	0	0	0	0	0.484172	0.562391	0.00553954	#DIV/0!	0.00553954	#DIV/0!	1.04656		#N/A
Pilrb2	0	0.159032	0	0	2.78243	0	0.445912	4.12896	0.42265	#DIV/0!	2.94146		#N/A
Grid1	0	0	0	0	0.137886	0.160267	0.00558764	#DIV/0!	0.00558764	#DIV/0!	0.298153		#N/A
Gm973	0	0	0	0.395951	0.131074	0.152378	0.00560147	#DIV/0!	0.803304	0.482217	0.679403		#N/A
Lamtor4	13.2554	13.2658	10.1259	15.2206	14.0458	14.1732	0.00562052	0.0895208	0.629765	0.15488	80.0867		#N/A
Gm7444	0	0	0	0	0.119	0.138388	0.00562616	#DIV/0!	0.00562616	#DIV/0!	0.257388		#N/A
Als2cr11	0	0	0	0	0	0	#DIV/0!	#DIV/0!	#DIV/0!	#DIV/0!	0		#N/A
Prokr1	0	0	0	0.209115	0.346034	0.402451	0.00563342	#DIV/0!	0.130437	1.83968	0.9576		#N/A
Agpat5	2.45698	2.74202	5.67237	3.99998	4.53578	4.49022	0.0056411	0.795853	0.736473	0.0997797	23.8973		#N/A
Art4	0.729743	0	0.771701	0.369737	6.73993	5.92385	0.0083105	4.11718	0.00617563	3.47178	14.535		#N/A
A430088P11Rik	0	0	0	0	0.106935	0.124432	0.00567046	#DIV/0!	0.00567046	#DIV/0!	0.231367		#N/A
Gm694	4.99907	5.82188	3.64288	0.76894	0	0	0.0057322	#NUM!	0.264525	#NUM!	15.2328		#N/A
D10Bwg1379e	0	0	0.10456	0.0334982	0.0553765	0.0645124	0.00575681	#DIV/0!	0.823496	0.203578	0.257947		#N/A
3110062M04Rik	9.53029	9.96666	5.38578	6.80351	6.8158	6.89037	0.00579361	0.508423	0.397188	0.169211	45.3924		#N/A
Lnx1	17.0744	9.66622	3.21876	4.18543	0.567954	0.988797	0.0769278	4.10242	0.0310049	2.2498	35.7016		#N/A
Tulp4	8.69683	8.20263	10.9239	12.8812	13.8367	13.233	0.00583336	0.679702	0.252005	0.185408	67.7743		#N/A
Idh2	15.9447	15.4971	9.85834	11.6738	9.53869	8.62331	0.00583594	0.791761	0.239257	0.245569	71.1359		#N/A
Polrmt	2.50326	2.72203	2.47695	3.09427	4.24674	4.13904	0.00590006	0.682434	0.0461647	0.589952	19.1823		#N/A
Sez6l2	10.4767	12.9669	5.72031	2.56735	0.874707	0.503075	0.0127706	4.08877	0.161468	2.58862	33.109		#N/A
Fam174b	1.28595	0.927247	2.03863	2.82309	18.1664	19.4199	0.00135582	4.086	0.00203564	2.95067	44.6612		#N/A
Snord70	0	0	0	0	0	0	#DIV/0!	#DIV/0!	#DIV/0!	#DIV/0!	0		#N/A
Snord11	0	0	0	0	0	0	#DIV/0!	#DIV/0!	#DIV/0!	#DIV/0!	0		#N/A
Traf4	5.65655	6.07292	3.28629	3.53403	3.16329	3.21533	0.00609342	0.878822	0.223131	0.0965951	24.9284		#N/A
Dusp5	22.4333	21.4515	16.928	13.5868	14.1342	13.2935	0.0061122	0.678088	0.464798	0.153875	101.827		#N/A
Dclk1	1.2263	0.087547	1.42939	2.27338	13.5637	8.60546	0.0546701	4.07668	0.0668308	2.58188	27.1858	TRUE	neuron migration
Tmem150b	0	0.0972847	0	0.307567	1.64013	0	0.44684	4.07545	0.508309	2.41484	2.04498		#N/A
Bzrap1	0	0.0343824	0.169557	0.036211	0.299328	0.278934	0.00535904	4.07198	0.10994	1.4907	0.818412		#N/A
Lzic	7.28337	6.96887	4.28723	3.41803	4.82094	4.59601	0.00633382	0.597857	0.196849	0.289416	31.3745		#N/A
Fkbp11	0	0.959216	1.60905	1.52203	5.94786	10.169	0.0727672	4.07057	0.0914406	2.36384	20.2072		#N/A
Rasgef1a	0	0.252187	1.38495	2.21441	1.90643	2.30053	0.0137096	4.06021	0.576234	0.225038	8.05851	TRUE	cell migration
9530026F06Rik	0	0	0	0	0	0	#DIV/0!	#DIV/0!	#DIV/0!	#DIV/0!	0		#N/A
Bahd1	7.68076	7.6627	9.13552	8.32656	10.0955	10.5213	0.00646831	0.426197	0.0746872	0.239595	53.4223		#N/A
Ctnnal1	2.92249	1.60985	13.9779	16.2674	38.9185	35.9761	0.00209019	4.04653	0.00690013	1.30815	109.672		#N/A
Mab21l1	0.741581	0.891214	0.326509	0.730498	0	0.100355	0.0135427	4.02416	0.148334	3.3968	2.79016		#N/A
Ryr2	0.0191462	0	0.0251995	0.113091	0.186864	0.124495	0.046406	4.02345	0.249528	1.17088	0.468796		#N/A
Rasl11a	7.2528	6.9146	5.97574	12.5557	10.2087	10.6329	0.0065426	0.556891	0.759526	0.169491	53.5404		#N/A
Dytn	0	0	0	0	0	0	#DIV/0!	#DIV/0!	#DIV/0!	#DIV/0!	0		#N/A
Mdh1b	0	0	0	0.178402	0	0	#DIV/0!	#DIV/0!	0.42265	#NUM!	0.178402		#N/A
Hip1	28.7228	29.7443	44.2934	43.6738	42.0449	44.0463	0.00655164	0.558241	0.465055	0.0310999	232.525		#N/A
Pdzd2	11.556	11.5754	14.61	16.171	13.1936	13.4816	0.00656926	0.205647	0.122583	0.206541	80.5876		#N/A
Tnfsf15	0	0.0453147	0.372634	0.23865	0.552538	0.183792	0.203969	4.0223	0.780142	0.26851	1.39293		#N/A
Stbd1	0	0.143132	0.236443	0.603625	0.250269	2.0299	0.353956	3.99372	0.511133	1.44056	3.26337		#N/A
Gm13749	0	0	0	0	0	0	#DIV/0!	#DIV/0!	#DIV/0!	#DIV/0!	0		#N/A
Cadps	0.060306	0	0.0796212	0.152961	0.75996	0.196453	0.254631	3.98726	0.330752	2.03989	1.2493		#N/A
Snora41	0	0	0	0	0	0	#DIV/0!	#DIV/0!	#DIV/0!	#DIV/0!	0		#N/A
4933402D24Rik	0	0	0	0	0	0	#DIV/0!	#DIV/0!	#DIV/0!	#DIV/0!	0		#N/A
Igfbp3	326.131	255.923	74.4746	44.8176	18.1182	18.5975	0.0161743	3.98668	0.108435	1.70003	738.062		#N/A
Sidt1	0.943153	0.0628675	0.206954	0.265106	0	0.0637352	0.397483	3.98043	0.0418627	2.88881	1.54182		#N/A
Pkd1l3	0	0.0407421	0	0.30051	0.63889	0	0.448767	3.97098	0.679037	1.08815	0.980142		#N/A
Mir6899	0	0	0	0	0	0	#DIV/0!	#DIV/0!	#DIV/0!	#DIV/0!	0		#N/A
Foxo1	22.5397	21.873	23.0442	27.0549	30.4667	31.7936	0.00685169	0.48734	0.102458	0.313528	156.772		#N/A
Poglut1	6.78854	6.5893	7.7615	7.16503	8.03476	8.16139	0.00694358	0.275806	0.172769	0.117772	44.5005		#N/A
Map6	11.0217	6.00043	5.32086	3.31821	0.208957	0.880684	0.0879669	3.96549	0.0701484	2.98702	26.7508		#N/A
Spink5	2.09208	0.949917	0	0	0.194746	0	0.133279	3.96535	0.42265	#DIV/0!	3.23674		#N/A
Aim2	0.136372	0.109256	0.360414	0.460607	2.67099	1.10713	0.15245	3.94312	0.199785	2.20218	4.84477		#N/A
Bpifa1	1.41531	6.2337	0	0	0.498153	0	0.277893	3.94061	0.42265	#DIV/0!	8.14716		#N/A
Akr1cl	0	0	0	0	0	0	#DIV/0!	#DIV/0!	#DIV/0!	#DIV/0!	0		#N/A
F10	1.53384	1.88482	0.36575	0.350557	0	0.224686	0.0166013	3.92745	0.16072	1.67267	4.35965		#N/A
Cryge	0	0	0	0	0	0	#DIV/0!	#DIV/0!	#DIV/0!	#DIV/0!	0		#N/A
Proser1	5.48541	5.3238	4.58494	3.13031	3.66864	3.8911	0.00708432	0.515853	0.925482	0.0293763	26.0842		#N/A
Crygc	0	0	0	0	0	0	#DIV/0!	#DIV/0!	#DIV/0!	#DIV/0!	0		#N/A
Crygb	0	0	0	0	0	0	#DIV/0!	#DIV/0!	#DIV/0!	#DIV/0!	0		#N/A
Crygd	0	0	0	0	0	0	#DIV/0!	#DIV/0!	#DIV/0!	#DIV/0!	0		#N/A
Cryga	0	0	0	0	0	0	#DIV/0!	#DIV/0!	#DIV/0!	#DIV/0!	0		#N/A
D630023F18Rik	0	0	0	0	0	0	#DIV/0!	#DIV/0!	#DIV/0!	#DIV/0!	0		#N/A
Pth2r	0	0	0	0	0	0	#DIV/0!	#DIV/0!	#DIV/0!	#DIV/0!	0		#N/A
Crygf	0	0	0	0	0	0	#DIV/0!	#DIV/0!	#DIV/0!	#DIV/0!	0		#N/A
Car7	11.9299	14.1427	4.1132	2.41913	0	0	0.00712613	#NUM!	0.0611511	#NUM!	32.6049		#N/A
Fgl2	1.96298	0.786409	2.82522	6.25169	21.8152	19.1327	0.00582895	3.89661	0.0181371	2.17352	52.7742		#N/A
2010016I18Rik	0	0.188293	0	0.794437	1.64906	1.14394	0.0402638	3.89076	0.167757	1.81381	3.77573		#N/A
Myl1	0	0	1.07536	0	0	0	#DIV/0!	#DIV/0!	0.42265	#NUM!	1.07536		#N/A
Alpl	12.4794	11.7559	6.34276	9.49543	1.34283	0.333891	0.00301528	3.8534	0.0505314	3.23969	41.7502		#N/A
Lrg1	52.6414	40.8311	281.434	363.391	576.405	766.849	0.0225249	3.84505	0.0779563	1.05875	2081.55		#N/A
Erbb4	0	0	0	0	0	0	#DIV/0!	#DIV/0!	#DIV/0!	#DIV/0!	0		cell migration
Cps1	0	0	0.15647	0	0	0	#DIV/0!	#DIV/0!	0.42265	#NUM!	0.15647		#N/A
Vwc2l	0	0	0	0	0	0	#DIV/0!	#DIV/0!	#DIV/0!	#DIV/0!	0		#N/A
Trp53i11	96.9452	89.5953	45.9982	46.5568	48.5191	50.547	0.00751188	0.913026	0.0904302	0.0980805	378.162		#N/A
Cd55	3.42545	1.31728	9.05325	12.1483	42.1725	25.1397	0.0676899	3.82708	0.116775	1.6667	93.2565		#N/A
Fat2	0.0223647	0	0.0883165	0.0754878	0.311852	0	0.452242	3.80157	0.682004	0.928888	0.498021		epithelial cell migration
D10Jhu81e	9.61333	9.45967	13.4931	8.58836	13.5034	14.2518	0.00765476	0.541226	0.37123	0.329923	68.9097		#N/A
Ptpru	0	0.386784	0.39757	0.611164	2.78014	2.59869	0.00724482	3.79769	0.00408767	2.41475	6.77435		#N/A
Nos2	11.3422	8.28009	3.54637	1.48934	0.938889	0.477707	0.0277334	3.79199	0.228159	1.82977	26.0746		#N/A
Slc6a4	0.125104	0	0	0.211261	1.22475	0.507886	0.1578	3.79177	0.17873	3.03587	2.069		#N/A
Cpm	5.09811	2.14463	3.02407	1.34468	0.266899	0.258867	0.150797	3.78404	0.149344	3.05473	12.1373		#N/A
Apol7d	0	0	0	0	0	0	#DIV/0!	#DIV/0!	#DIV/0!	#DIV/0!	0		#N/A
Gm8883	0	0	0	0	0	0	#DIV/0!	#DIV/0!	#DIV/0!	#DIV/0!	0		#N/A
4933417E11Rik	0	0	0	0	0	0	#DIV/0!	#DIV/0!	#DIV/0!	#DIV/0!	0		#N/A
Tmem169	0	0	0	0.205753	0	0	#DIV/0!	#DIV/0!	0.42265	#NUM!	0.205753		#N/A
Prnd	15.2537	23.4399	7.77856	5.20166	1.64473	1.2044	0.0485324	3.7635	0.0605966	2.18772	54.523		#N/A
Csf3	3.02133	10.1196	40.8441	55.0119	79.8629	98.2036	0.0139229	3.76028	0.0710993	0.893475	287.063		#N/A
Reln	0.11067	0	0	0	1.3119	0.179888	0.348564	3.75271	0.318266	#DIV/0!	1.60246	#DIV/0!	neuron migration
43528	0	0	0	0	0	0	#DIV/0!	#DIV/0!	#DIV/0!	#DIV/0!	0		#N/A
Ankar	0	0	0	0	0	0	#DIV/0!	#DIV/0!	#DIV/0!	#DIV/0!	0		#N/A
Fam217a	0	0.232678	0.767805	0.613129	1.82889	1.29671	0.0380257	3.74773	0.0878166	1.17849	4.73921		#N/A
Parp3	8.90657	8.18506	10.2099	9.73234	12.6416	12.8673	0.00797022	0.577711	0.0088839	0.355173	62.5428		#N/A
1700027A15Rik	0	0	0	0	0	0	#DIV/0!	#DIV/0!	#DIV/0!	#DIV/0!	0		#N/A
Sod3	5.18528	3.1847	15.5507	11.8243	46.9606	64.3848	0.0278044	3.73367	0.0421977	2.02411	147.09		#N/A
Tnp1	0	0	0	0	0	0	#DIV/0!	#DIV/0!	#DIV/0!	#DIV/0!	0		#N/A
Disp2	0.247502	1.26927	2.15219	4.34475	8.70372	11.4631	0.0239999	3.73291	0.0605029	1.63415	28.1805		#N/A
Mir6351	0	0	0	0	0	0	#DIV/0!	#DIV/0!	#DIV/0!	#DIV/0!	0		#N/A
Vwa3a	1.60127	2.44944	0.191945	0.307182	0.304918	0	0.0533106	3.73168	0.611758	0.710986	4.85475		#N/A
Pinc	0	0	0	0	0	0	#DIV/0!	#DIV/0!	#DIV/0!	#DIV/0!	0		#N/A
D530049I02Rik	0	0	0	0	0	0	#DIV/0!	#DIV/0!	#DIV/0!	#DIV/0!	0		#N/A
Rps27	4.47957	259.911	20.0943	8.94051	9.6086	10.3117	0.439526	3.73036	0.500436	0.543544	313.346		#N/A
Icam1	138.299	142.457	139.18	126.098	168.128	165.707	0.00811702	0.249818	0.035657	0.33163	879.869	FALSE	T cell extravasation
Cxcr1	0	0	0	0	0	0	#DIV/0!	#DIV/0!	#DIV/0!	#DIV/0!	0		cell chemotaxis
Srgap2	14.1238	13.464	9.03409	10.5493	7.92708	8.67388	0.00812652	0.732764	0.219517	0.238364	63.7721	FALSE	extension of a leading process involved in cell motility in cerebral cortex radial glia guided migration
Slc6a2	0.0541908	0	0.142818	0.274418	0.453798	0.264183	0.0780678	3.72783	0.3224	0.783082	1.18941		#N/A
4921531C22Rik	0.935398	0.899197	0.495287	0.790085	0.524225	0.455414	0.00816949	0.905139	0.418841	0.391864	4.09961		#N/A
Slfn5os	1.72435	2.06953	0	5.85008	0	0	0.00817658	#NUM!	0.42265	#NUM!	9.64396		#N/A
Itpr2	18.4569	19.0813	15.8907	18.0074	13.7793	13.0234	0.00823766	0.485981	0.0873909	0.338826	98.239		#N/A
Sox15	0.681856	0.819083	2.26844	2.01759	0	0	0.00825561	#NUM!	0.00340795	#NUM!	5.78697		#N/A
Tnip3	0	0.142983	0	0	1.74521	0.144945	0.390426	3.72459	0.35897	#DIV/0!	2.03314		#N/A
Myo1e	23.5528	24.3027	17.6923	17.8408	13.7721	11.8841	0.00827048	0.899377	0.0348547	0.469856	109.045		#N/A
Pipox	0.405405	0.487129	0	0.171229	0	0	0.00827999	#NUM!	0.42265	#NUM!	1.06376		#N/A
Foxa3	0.346817	0.416754	0	0	0	0	0.00828498	#NUM!	#DIV/0!	#DIV/0!	0.763571		#N/A
Tlx1	0.697055	0.837619	0	0.441542	0	0	0.008285	#NUM!	0.42265	#NUM!	1.97622		#N/A
Plin1	0.384274	0.461786	0	0	0	0	0.00828914	#NUM!	#DIV/0!	#DIV/0!	0.84606		#N/A
Gabre	0.245951	0.295578	0.16243	0	0	0	0.00829399	#NUM!	0.42265	#NUM!	0.703959		#N/A
Mir26b	0	0	0	0	0	0	#DIV/0!	#DIV/0!	#DIV/0!	#DIV/0!	0		#N/A
Prkag3	0	0	0	0	0	0	#DIV/0!	#DIV/0!	#DIV/0!	#DIV/0!	0		#N/A
Pde4c	0.212857	0.255816	0	0.0898522	0	0	0.0082973	#NUM!	0.42265	#NUM!	0.558525		#N/A
C920009B18Rik	0	0.0591184	0	0.0622778	0.721236	0.0599366	0.390403	3.72396	0.392249	3.64885	0.902569		#N/A
Dner	0.185588	0.223048	0	0	0	0	0.00829907	#NUM!	#DIV/0!	#DIV/0!	0.408636		#N/A
C77370	0	0	0.352647	0.200906	0.664092	0.798138	0.00829934	#DIV/0!	0.0462317	1.40138	2.01578		#N/A
Cdk5r2	0	0	0	0	0	0	#DIV/0!	#DIV/0!	#DIV/0!	#DIV/0!	0		layer formation in cerebral cortex
Fev	0	0	0	0	0	0	#DIV/0!	#DIV/0!	#DIV/0!	#DIV/0!	0		#N/A
Mir375	0	0	0	0	0	0	#DIV/0!	#DIV/0!	#DIV/0!	#DIV/0!	0		#N/A
Ccdc108	0	0	0.0760168	0.0973653	0	0	#DIV/0!	#DIV/0!	0.0148246	#NUM!	0.173382		#N/A
Cryba2	0	0	0	0	0	0	#DIV/0!	#DIV/0!	#DIV/0!	#DIV/0!	0		#N/A
Epn3	0.172874	0.207772	0	0	0	0	0.00830089	#NUM!	#DIV/0!	#DIV/0!	0.380646		#N/A
Ihh	0	0	0	0	0	0	#DIV/0!	#DIV/0!	#DIV/0!	#DIV/0!	0		#N/A
Ppfia3	0.13645	0.164	0.0899455	0	0	0	0.00830354	#NUM!	0.42265	#NUM!	0.390396		#N/A
Myh7b	0.107303	0.128972	0.070697	0.0905618	0	0	0.00830625	#NUM!	0.0148379	#NUM!	0.397534		#N/A
Rp1l1	0.0970369	0.116634	0	0	0	0	0.0083072	#NUM!	#DIV/0!	#DIV/0!	0.213671		#N/A
Celsr1	0.703698	0.422923	2.50928	3.90935	5.80679	9.07895	0.0525251	3.72386	0.140412	1.21359	22.431	TRUE	neuron migration
Tub	0	0.044422	0	0.140368	0.541635	0.0450433	0.390375	3.72322	0.478278	2.06336	0.771468		#N/A
Cldn5	409.722	363.934	154.068	100.539	35.404	23.4257	0.00435518	-3.71708	0.0703209	-2.11366	1087.09		#N/A
Sybu	7.47194	6.40812	3.10439	2.28259	0.327272	0.73182	0.00778854	3.71211	0.0419924	2.34665	20.3261		#N/A
Fam84a	0.500798	0.56175	0	0.0845564	0	0.0813437	0.0105619	3.70735	0.980642	0.0558833	1.22845		#N/A
Slc1a1	2.99575	1.96389	1.55706	0.613072	0.380504	0	0.0531277	3.70425	0.220763	2.5118	7.51028		#N/A
Cdnf	0	0.0907374	0.299074	0.382466	0.791671	0.367858	0.132529	3.6757	0.383749	0.766669	1.93181		#N/A
A630095N17Rik	0	0	0	0	0	0	#DIV/0!	#DIV/0!	#DIV/0!	#DIV/0!	0		#N/A
Xylb	1.30501	0.48793	1.033	0	0	0.141284	0.184616	3.66566	0.482509	2.87017	2.96722		#N/A
Rhbdf1	14.1588	14.0722	7.21926	9.91892	9.20537	10.0388	0.00858164	0.552859	0.533734	0.167208	64.6133	FALSE	cell migration
Msx1	6.26487	3.54262	2.68278	1.55634	0.774426	0	0.0857345	3.66268	0.126738	2.45257	14.821		#N/A
Nmnat3	0	0.260643	1.93641	0.549531	2.50532	0.792195	0.221777	3.66123	0.74804	0.407587	6.0441		#N/A
Fjx1	2.57623	0.802648	3.78346	7.85578	18.6252	24.0508	0.0204541	3.65881	0.0446031	1.87443	57.6941		#N/A
Chga	0.568938	1.36729	1.25531	0.640748	0	0.153883	0.159687	3.65334	0.110708	3.6231	3.98617	TRUE	mast cell chemotaxis
Wfikkn1	0.409291	0.983726	0.180285	0.92161	0	0.110761	0.159726	3.65269	0.317029	3.31446	2.60567		#N/A
Tom1l2	19.1779	18.1829	16.2327	15.2412	13.3332	13.4488	0.00884714	0.480262	0.0424055	0.232892	95.6167		#N/A
Prdm15	1.24276	1.24478	1.22812	1.26737	1.01172	1.05185	0.00886265	0.269577	0.0164741	0.274181	7.0466		#N/A
Srm	6.79751	7.2591	9.02783	7.89909	13.132	12.1692	0.00889632	0.847957	0.0299814	0.579886	56.2847		#N/A
Asic4	0	0	0	0.21965	0	0	#DIV/0!	#DIV/0!	0.42265	#NUM!	0.21965		#N/A
Hist1h2bh	0	0.802566	0	1.7034	10.0752	0	0.455764	3.65004	0.498712	2.56432	12.5812		#N/A
Gm15179	0	0	0	0	0	0	#DIV/0!	#DIV/0!	#DIV/0!	#DIV/0!	0		#N/A
Grap	22.8156	21.3825	17.2392	16.9628	12.8018	13.6945	0.00897506	0.738193	0.014391	0.36829	104.896		#N/A
Rcan1	28.1822	26.0498	246.187	231.541	319.882	358.147	0.0037533	3.64413	0.0393864	0.505158	1209.99		#N/A
Spns3	0.19705	0	0	0.166448	1.65697	0.799396	0.124075	3.63989	0.119913	3.88338	2.81986		#N/A
Dact3	1.69737	1.65132	1.60129	2.45678	1.01725	0.885994	0.00913412	0.815136	0.130486	1.09233	9.31		#N/A
Pdia5	5.75008	6.35336	51.4635	49.0738	73.086	76.0935	0.000500374	3.62356	0.00617866	0.569318	261.82		#N/A
Gm10825	0	0.0586692	0	0.679848	0.306747	0.41637	0.033278	3.62355	0.955614	0.0890169	1.46163		#N/A
Gm17751	0	0	0	0	0	0	#DIV/0!	#DIV/0!	#DIV/0!	#DIV/0!	0		#N/A
Mir6343	0	0	0	0	0	0	#DIV/0!	#DIV/0!	#DIV/0!	#DIV/0!	0		#N/A
Cdhr1	0.0775798	0	0	0	0.758449	0.189059	0.269257	3.61039	0.238004	#DIV/0!	1.02509		#N/A
Pax3	0	0	0	0	0	0	#DIV/0!	#DIV/0!	#DIV/0!	#DIV/0!	0		cell migration
Mogat1	0	0	0	0	0	0	#DIV/0!	#DIV/0!	#DIV/0!	#DIV/0!	0		#N/A
Nepn	8.64876	4.7238	1.30141	0.830181	1.1019	0	0.0949228	3.60121	0.480771	0.951937	16.6061		#N/A
Wnk4	0.403247	0.387723	0.106371	0.136155	0	0.0655113	0.0085029	3.59381	0.13307	1.88832	1.09901		#N/A
Peak1	19.5678	19.9138	15.7379	18.4303	10.1672	11.8252	0.00924878	0.844175	0.0613038	0.635649	95.6422	FALSE	cell migration
Sufu	5.52119	5.54812	6.50479	5.71918	7.09531	6.82075	0.00926122	0.330186	0.179052	0.187038	37.2093		#N/A
Mapk15	0.184368	0	0	0	2.06634	0.149608	0.402037	3.58726	0.367082	#DIV/0!	2.40032		#N/A
Mir6352	0	0	0	0	0	0	#DIV/0!	#DIV/0!	#DIV/0!	#DIV/0!	0		#N/A
Furin	44.6496	47.7023	29.9745	28.6778	24.5955	27.0914	0.00927201	0.837343	0.13162	0.182389	202.691		#N/A
Hs1bp3	1.84823	1.851	1.52537	1.85304	2.90715	2.7202	0.00927267	0.605231	0.0270041	0.736111	12.705		#N/A
Rapgef5	16.228	15.428	17.0805	21.2932	21.2593	22.0603	0.00928973	0.452541	0.367978	0.174902	113.349		#N/A
Ahdc1	11.1846	11.8301	7.72826	9.22963	5.82701	6.62414	0.00929699	0.886277	0.117677	0.445678	52.4237		#N/A
St6galnac3	4.32068	3.60039	3.41987	4.74148	7.72598	7.65067	0.00930421	0.956974	0.03205	0.913862	31.4591		#N/A
1700016L21Rik	0	0	0	0	0	0	#DIV/0!	#DIV/0!	#DIV/0!	#DIV/0!	0		#N/A
Abca8b	1.75686	1.06649	3.43743	1.03344	0.148603	0.0865138	0.0648262	3.58596	0.220236	4.24911	7.52934		#N/A
Htr2b	0	0.682316	0	0	5.72512	2.35019	0.164875	3.56501	0.139125	#DIV/0!	8.75763	#DIV/0!	neural crest cell migration
Mir6344	0	0	0	0	0	0	#DIV/0!	#DIV/0!	#DIV/0!	#DIV/0!	0		#N/A
Nyap2	0	0	0	0	0	0	#DIV/0!	#DIV/0!	#DIV/0!	#DIV/0!	0		#N/A
Crb2	0.206253	0.289223	0	0.261108	0	0.0418968	0.0395202	3.5639	0.494318	2.63973	0.798481		ingression involved in gastrulation with mouth forming second
Dlg2	0.277063	0.222412	1.09736	0.140556	0	0.0427419	0.022306	3.54669	0.338363	4.85612	1.78013		#N/A
Fzd6	10.1717	8.67379	9.51961	6.23136	17.6482	17.1939	0.00943949	0.886612	0.0289274	1.14539	69.4386		#N/A
Khdrbs3	1.69569	1.50931	1.4965	2.70541	2.90385	2.75187	0.00949266	0.819386	0.355147	0.428665	13.0626		#N/A
Coro6	0.874597	1.86797	0.774574	0.246378	0	0.236301	0.133533	3.53683	0.307901	2.11122	3.99982	TRUE	cell migration
Satb2	0.438095	0.150445	0.0824942	0.0528236	0	0.0508467	0.207016	3.53291	0.287787	1.41213	0.774705		neuron migration
Bcl2l14	0	0.126442	0.417429	0.399862	1.32565	0.128106	0.385263	3.52324	0.648245	0.830863	2.39749		#N/A
Tnfrsf9	4.70473	1.50248	6.84074	5.98547	33.9147	37.4492	0.00531538	3.52318	0.003837	2.4761	90.3973		#N/A
9130011E15Rik	2.59988	2.46173	2.80918	4.39019	3.96582	3.74239	0.0097085	0.6068	0.780172	0.0985252	19.9692		#N/A
Ccl20	0	0	0	0	0	0	#DIV/0!	#DIV/0!	#DIV/0!	#DIV/0!	0		cell chemotaxis
Daw1	0	0	0	0	0	0	#DIV/0!	#DIV/0!	#DIV/0!	#DIV/0!	0		#N/A
Numb	22.2368	20.7363	17.1704	18.3583	13.9634	13.864	0.00971472	0.626928	0.0231306	0.352479	106.329		#N/A
Nes	34.8013	39.8066	16.7014	15.8191	3.07315	3.44729	0.00539043	-3.51629	0.00135586	-2.31831	113.649		#N/A
Tspan8	3.67704	0.650372	0	0.68619	0.380032	0	0.324934	3.50931	0.733956	0.852487	5.39363		#N/A
Mir5126	0	0	0	0	0	0	#DIV/0!	#DIV/0!	#DIV/0!	#DIV/0!	0		#N/A
Rasal1	1.57417	1.58932	3.98599	9.83524	15.9591	20.0284	0.0150241	3.50791	0.0896555	1.38061	52.9722		#N/A
Mir6353	0	0	0	0	0	0	#DIV/0!	#DIV/0!	#DIV/0!	#DIV/0!	0		#N/A
Cyp27a1	0.188745	0.3024	0.999451	1.2754	3.43797	2.14415	0.0593503	3.50659	0.129614	1.29504	8.34812		#N/A
Ntm	1.19041	0.635732	0	0.335184	0	0.160974	0.102194	3.5039	0.685518	1.05813	2.3223		#N/A
Syne1	3.94144	6.69258	2.59624	2.57398	0.32737	0.610035	0.0726002	3.50387	0.00445717	2.46348	16.7416		#N/A
Nr6a1	0.56078	0.639144	0.517302	0.493674	1.01753	0.993748	0.0100346	0.745169	0.0011213	0.992364	4.22218		#N/A
Fgf12	0	0	0	0	0.423369	0.345452	0.0101154	#DIV/0!	0.0101154	#DIV/0!	0.768821		#N/A
Izumo1	0	0.197793	0	0	1.03974	1.20154	0.0152804	3.50226	0.00517114	#DIV/0!	2.43907		#N/A
9930111H07Rik	0	0	0	0	0	0	#DIV/0!	#DIV/0!	#DIV/0!	#DIV/0!	0		#N/A
Mir8096	0	0	0	0	0	0	#DIV/0!	#DIV/0!	#DIV/0!	#DIV/0!	0		#N/A
Thrsp	29.4041	24.7692	12.2134	9.04178	1.07616	3.71127	0.0114551	3.50026	0.0573572	2.15049	80.2159		#N/A
Skint2	0.296708	0.241773	0	0	0	0	0.0102481	#NUM!	#DIV/0!	#DIV/0!	0.538481		#N/A
Coro2b	11.394	11.3741	5.91517	4.0209	1.04396	0.986098	8.70557e-06	3.48742	0.0529395	2.29115	34.7342		#N/A
Ehd3	3.96009	3.32054	18.3486	29.8539	38.6029	42.9352	0.00345988	3.48534	0.113347	0.758366	137.021		#N/A
Vangl1	4.99726	5.21165	4.07997	4.97085	3.65601	3.41498	0.0104034	0.529845	0.165101	0.356136	26.3307		#N/A
Xkr6	0.272743	0.327768	1.62186	2.18789	1.90785	4.76067	0.167311	3.4731	0.429278	0.80767	11.0788		#N/A
Gm10406	0.908667	0.727925	0	0.153496	0	0.147474	0.0236719	3.47216	0.979999	0.0577404	1.93756		#N/A
Spata3	0	0	0	0	0	0	#DIV/0!	#DIV/0!	#DIV/0!	#DIV/0!	0		#N/A
Lhfpl2	14.7371	13.5303	21.5602	20.2791	21.9753	23.2569	0.0105964	0.678211	0.202039	0.112491	115.339		#N/A
H60b	0	0.34144	0	0.721384	2.40657	1.38082	0.0859279	3.4715	0.134377	2.39236	4.85021		#N/A
Piwil2	0.337719	0.270605	0.178091	0.0570106	0	0.0548727	0.0236675	3.47068	0.307965	2.09912	0.898298		#N/A
Elovl7	0.0607787	0.0974019	0.320433	0.102597	1.3575	0.39504	0.239688	3.4698	0.310232	2.05062	2.33375		#N/A
Prkcg	16.8237	24.6115	6.13979	7.18704	1.598	2.16459	0.0403766	3.46106	0.0151476	1.82454	58.5246		#N/A
Lox	1.26533	0.977502	4.46806	1.44497	12.784	11.8379	0.00194699	3.45655	0.0274907	2.05797	32.7778	TRUE	cell chemotaxis
Tmem2	27.3597	26.5217	38.5852	41.4496	50.6862	56.1776	0.0108146	0.987914	0.0493792	0.417074	240.78		#N/A
Birc6	12.3408	12.6563	11.8866	13.9133	10.2273	9.81451	0.0108151	0.318748	0.108439	0.364353	70.8388		#N/A
Lao1	0.72569	0.872016	0.720325	0.153233	0	0.147222	0.0198705	3.43994	0.34081	2.56891	2.61849		#N/A
H2-Q10	0	0.200912	0	0	1.76044	0.406817	0.287286	3.43123	0.25051	#DIV/0!	2.36817		#N/A
Nppc	0	0	0	0	0	0	#DIV/0!	#DIV/0!	#DIV/0!	#DIV/0!	0		#N/A
Sema4f	0	0.100705	0.325824	0	0.879877	0.204117	0.28673	3.42815	0.418587	1.73419	1.51052	TRUE	neural crest cell migration
Cecr2	1.27081	1.32949	0.650813	0.655373	0.098482	0.143436	0.000980978	3.42609	0.00179766	2.43277	4.1484		#N/A
Adamdec1	0.43229	0.230886	0.38093	0.243361	6.04914	1.05278	0.326757	3.42075	0.324384	3.50792	8.38939		#N/A
Ly6c1	1009.78	691.542	521.996	350.894	99.6	59.7158	0.0406423	-3.41669	0.0556109	-2.45391	2733.53		#N/A
Snora75	0	0	0	0	0	0	#DIV/0!	#DIV/0!	#DIV/0!	#DIV/0!	0		#N/A
Mir3535	0	0	0	0	0	0	#DIV/0!	#DIV/0!	#DIV/0!	#DIV/0!	0		#N/A
Snord82	0	0	0	0	0	0	#DIV/0!	#DIV/0!	#DIV/0!	#DIV/0!	0		#N/A
Tril	13.4529	14.7848	8.1339	3.95847	1.55064	1.10301	0.00300277	3.41157	0.153601	2.18805	42.9837		#N/A
Rpl37	121.101	111.576	114.382	107.346	162.984	167.193	0.0112158	0.504911	0.00566696	0.574449	784.582		#N/A
Chrnd	0	0	0	0.0972807	0	0	#DIV/0!	#DIV/0!	0.42265	#NUM!	0.0972807		#N/A
Prss56	0	0	0	0	0	0	#DIV/0!	#DIV/0!	#DIV/0!	#DIV/0!	0		#N/A
Havcr1	0.191109	0	0	0.161448	1.87567	0.155158	0.399244	3.4096	0.392438	3.65293	2.38339		#N/A
E330020D12Rik	0.36386	0.680214	0.16019	0.20481	0	0.0984813	0.103976	3.40623	0.132607	1.88997	1.50756		#N/A
P2rx2	0	0.148642	0	0.186035	1.03984	0.535953	0.112998	3.40616	0.122521	3.08243	1.91047		#N/A
3110079O15Rik	0	0	0	0	0	0	#DIV/0!	#DIV/0!	#DIV/0!	#DIV/0!	0		#N/A
Wnk1	32.2089	30.7063	35.6305	35.1392	42.633	40.9866	0.0113926	0.410433	0.0174124	0.240709	217.305	FALSE	lymphocyte migration into lymph node
Zfp354a	0	0.0666313	0	0	0.232322	0.472839	0.124806	3.40368	0.0993083	#DIV/0!	0.771792		#N/A
8430431K14Rik	0	0.0961831	0	0.405442	1.00723	0	0.46293	3.38847	0.635108	1.31283	1.50886		#N/A
Raet1e	0.00217908	1.1915	0.00248302	4.20211	8.36355	4.02233	0.130758	3.37521	0.308307	1.55866	17.7842		#N/A
Clec4a1	0.705213	0	2.49347	0	6.92606	0.381313	0.42151	3.37322	0.56287	1.5512	10.5061		#N/A
Zdbf2	0.437077	0.206012	0.812363	1.36315	3.31835	3.33792	0.00148387	3.37162	0.0147942	1.61336	9.47487		#N/A
Cep89	2.42351	2.26524	4.44768	2.72851	3.57869	3.38857	0.0115829	0.571388	0.914896	0.0426267	18.8322		#N/A
Gja4	28.1322	27.0076	23.3324	14.8763	1.50561	3.83261	0.00268236	3.36866	0.0643918	2.83947	98.6867		#N/A
Klc1	47.0712	45.0893	29.9279	37.7875	35.0786	36.2062	0.0117215	0.370554	0.697062	0.0741105	231.161		#N/A
Scarna6	0	0	0	0	0	0	#DIV/0!	#DIV/0!	#DIV/0!	#DIV/0!	0		#N/A
Trpm8	0	0	0	0	0	0	#DIV/0!	#DIV/0!	#DIV/0!	#DIV/0!	0		#N/A
Prkg2	1.98261	0.226944	0.560152	1.01603	0.0988723	0.115045	0.373537	3.36863	0.0962188	2.88131	3.99965		#N/A
Zfp319	5.46029	4.89746	1.82735	3.0957	2.61817	2.58177	0.0117471	0.994144	0.847502	0.0789426	20.4807		#N/A
Gm15417	0.883659	1.2307	1.34065	1.49502	0	0.20486	0.0417702	3.36751	0.00937329	3.79098	5.15489		#N/A
Megf6	0.57201	0.572943	1.06759	1.68962	5.72037	6.04231	0.000918104	3.36086	0.00599469	2.09294	15.6648		#N/A
Gm19589	0	0	0	0	0	0	#DIV/0!	#DIV/0!	#DIV/0!	#DIV/0!	0		#N/A
2410088K16Rik	0	0	0	0	0	0	#DIV/0!	#DIV/0!	#DIV/0!	#DIV/0!	0		#N/A
1700067G17Rik	0	0	0	0	0	0	#DIV/0!	#DIV/0!	#DIV/0!	#DIV/0!	0		#N/A
Ism1	1.26744	0.646207	0.152148	0.194561	0	0.187125	0.116955	3.35425	0.493055	0.889723	2.44748		#N/A
C030007H22Rik	0	0	0	0	0	0	#DIV/0!	#DIV/0!	#DIV/0!	#DIV/0!	0		#N/A
H2afy3	0	0.149339	0	0.629842	0	1.51271	0.464416	3.34047	0.643977	1.26407	2.29189		#N/A
Spag17	0.041529	0.0332778	0.109401	0.105142	0	0	0.0119485	#NUM!	0.000393849	#NUM!	0.28935		#N/A
Asb18	0	0	0	0	0	0	#DIV/0!	#DIV/0!	#DIV/0!	#DIV/0!	0		#N/A
Ido1	1.17797	0.754846	0.624764	0.597154	0	0.191079	0.0642768	3.33846	0.0333328	2.67691	3.34581		#N/A
Cftr	0.0521382	0.0417782	0.206099	0	0	0	0.0119508	#NUM!	0.42265	#NUM!	0.300015		#N/A
Bai1	0.0528049	0.0423124	0	0	0	0	0.0119509	#NUM!	#DIV/0!	#DIV/0!	0.0951173		#N/A
Alpk3	0.103177	0.0826754	0	0.0870785	0	0	0.0119509	#NUM!	0.42265	#NUM!	0.272931		#N/A
Iqca	0	0	0	0.178687	0	0	#DIV/0!	#DIV/0!	0.42265	#NUM!	0.178687		#N/A
Strc	0.0572754	0.0458941	0	0	0	0	0.011952	#NUM!	#DIV/0!	#DIV/0!	0.103169		#N/A
Gm9573	0.0632699	0.0506969	0	0	0	0	0.0119531	#NUM!	#DIV/0!	#DIV/0!	0.113967		#N/A
Abcc6	0.200713	0.160826	0	0	0	0	0.0119539	#NUM!	#DIV/0!	#DIV/0!	0.361539		#N/A
Fibcd1	0.0699509	0.0560495	0	0.0590432	0	0	0.0119545	#NUM!	0.42265	#NUM!	0.185044		#N/A
4831440E17Rik	0.0711085	0.0569769	0.375025	0.0600207	0	0	0.0119548	#NUM!	0.301324	#NUM!	0.563131		#N/A
Abcc12	0.07385	0.0591733	0	0	0	0	0.0119552	#NUM!	#DIV/0!	#DIV/0!	0.133023		#N/A
Aff2	0.0742813	0.0595188	0	0	0	0	0.0119554	#NUM!	#DIV/0!	#DIV/0!	0.1338		#N/A
Rnf43	0.154895	0.124111	0.306409	0.196121	0	0	0.0119558	#NUM!	0.044943	#NUM!	0.781536		#N/A
Col8a2	0.077072	0.0617546	0	0.19517	0	0	0.0119559	#NUM!	0.42265	#NUM!	0.333997		#N/A
Cldn19	0.0788886	0.0632099	0	0.133181	0	0	0.0119563	#NUM!	0.42265	#NUM!	0.27528		#N/A
Wnt7b	0.100285	0.0803537	0	0.16941	0	0	0.0119565	#NUM!	0.42265	#NUM!	0.350049		#N/A
Hsf5	0.0804453	0.064457	0.212201	0.0679053	0	0	0.0119567	#NUM!	0.191746	#NUM!	0.425009		#N/A
Prlh	0	0	0	0	0	0	#DIV/0!	#DIV/0!	#DIV/0!	#DIV/0!	0		#N/A
Dmbx1	0.0832586	0.0667108	0	0	0	0	0.0119572	#NUM!	#DIV/0!	#DIV/0!	0.149969		#N/A
Gsg1l	0.0855074	0.0685123	0.33839	0.0721805	0	0	0.0119578	#NUM!	0.262954	#NUM!	0.56459		#N/A
Rab17	0	0	0	0	0	0	#DIV/0!	#DIV/0!	#DIV/0!	#DIV/0!	0		#N/A
Gldc	0.0888277	0.0711722	0	0.224954	0	0	0.0119585	#NUM!	0.42265	#NUM!	0.384954		#N/A
Gabra3	0.0902906	0.0723442	0.119126	0.0762204	0	0	0.0119587	#NUM!	0.0450092	#NUM!	0.357981		#N/A
Lrrn1	0.26866	0.21526	0	0	0	0	0.0119589	#NUM!	#DIV/0!	#DIV/0!	0.48392		#N/A
Mroh6	0.100413	0.0804527	0	0	0	0	0.0119612	#NUM!	#DIV/0!	#DIV/0!	0.180866		#N/A
BC030499	0.313824	0.25144	0	0.176628	0	0	0.0119618	#NUM!	0.42265	#NUM!	0.741892		#N/A
Mfsd2b	0.217815	0.174515	0.14378	0.275839	0	0	0.0119626	#NUM!	0.0864005	#NUM!	0.811949		#N/A
Scnn1g	0.115222	0.0923153	0	0	0	0	0.0119642	#NUM!	#DIV/0!	#DIV/0!	0.207537		wound healing"
Qrfp	0.358931	0.287572	0.316023	0.202034	0	0	0.0119648	#NUM!	0.0451597	#NUM!	1.16456		#N/A
Ccdc36	0.119509	0.0957494	0	0	0	0	0.0119649	#NUM!	#DIV/0!	#DIV/0!	0.215258		#N/A
1700020N18Rik	0	0	0	0	0	0	#DIV/0!	#DIV/0!	#DIV/0!	#DIV/0!	0		#N/A
Oprl1	0.233621	0.187174	0	0	0	0	0.0119653	#NUM!	#DIV/0!	#DIV/0!	0.420795		#N/A
2810454H06Rik	0.242759	0.194495	0.641253	0	0	0	0.0119655	#NUM!	0.42265	#NUM!	1.07851		#N/A
Eno4	0.134639	0.107868	0	0	0	0	0.0119682	#NUM!	#DIV/0!	#DIV/0!	0.242507		#N/A
Mill1	0.278476	0.223104	0	0	0	0	0.0119687	#NUM!	#DIV/0!	#DIV/0!	0.50158		#N/A
Lmod3	0.156124	0.125076	0	0.395539	0	0	0.0119724	#NUM!	0.42265	#NUM!	0.676739		#N/A
Aldh3b2	0.162591	0.130255	0	0.137312	0	0	0.011974	#NUM!	0.42265	#NUM!	0.430158		#N/A
Proz	0.145017	1.04562	0	0.244916	0	0.117722	0.358929	3.33828	0.685785	1.0569	1.55327		#N/A
Olfr1416	0	0	0	0	0	0	#DIV/0!	#DIV/0!	#DIV/0!	#DIV/0!	0		#N/A
Olfr1415	0	0	0	0	0	0	#DIV/0!	#DIV/0!	#DIV/0!	#DIV/0!	0		#N/A
Olfr1414	0	0	0	0	0	0	#DIV/0!	#DIV/0!	#DIV/0!	#DIV/0!	0		#N/A
Olfr1412	0	0	0	0	0	0	#DIV/0!	#DIV/0!	#DIV/0!	#DIV/0!	0		#N/A
Olfr1411	0	0	0	0	0	0	#DIV/0!	#DIV/0!	#DIV/0!	#DIV/0!	0		#N/A
Olfr1413	0	0	0	0	0	0	#DIV/0!	#DIV/0!	#DIV/0!	#DIV/0!	0		#N/A
Olfr1410	0	0	0	0	0	0	#DIV/0!	#DIV/0!	#DIV/0!	#DIV/0!	0		#N/A
Olfr12	0	0	0	0	0	0	#DIV/0!	#DIV/0!	#DIV/0!	#DIV/0!	0		#N/A
Npas1	0.337253	0.270177	0.446151	0	0	0	0.0119753	#NUM!	0.42265	#NUM!	1.05358		#N/A
Mir6900	0	0	0	0	0	0	#DIV/0!	#DIV/0!	#DIV/0!	#DIV/0!	0		#N/A
Gnb3	0.193807	0.155253	0	0	0	0	0.0119806	#NUM!	#DIV/0!	#DIV/0!	0.34906		#N/A
Gm5796	0.395079	0.316484	0.523167	1.50176	0	0	0.0119813	#NUM!	0.174401	#NUM!	2.73649		#N/A
C9	0.203611	0.163104	0	0	0	0	0.0119823	#NUM!	#DIV/0!	#DIV/0!	0.366715		#N/A
Gng3	0.425761	0.341053	0	0	0	0	0.0119841	#NUM!	#DIV/0!	#DIV/0!	0.766814		#N/A
Agxt	0	0	0	0	0	0	#DIV/0!	#DIV/0!	#DIV/0!	#DIV/0!	0		#N/A
Tnfsf13b	0.213023	0.17064	1.12895	0.539874	0	0	0.0119845	#NUM!	0.105287	#NUM!	2.05249		#N/A
Card9	0.226208	0.181197	0	0	0	0	0.0119873	#NUM!	#DIV/0!	#DIV/0!	0.407405		#N/A
Tmem45b	0.232153	0.185957	0	0.196141	0	0	0.0119884	#NUM!	0.42265	#NUM!	0.614251		#N/A
Ncr1	0.252827	0.202509	0	0	0	0	0.0119926	#NUM!	#DIV/0!	#DIV/0!	0.455336		#N/A
Ptx4	0.247096	0.197917	0	0	0	0	0.0119935	#NUM!	#DIV/0!	#DIV/0!	0.445013		#N/A
Mir149	0	0	0	0	0	0	#DIV/0!	#DIV/0!	#DIV/0!	#DIV/0!	0		#N/A
2310007B03Rik	0	0	0	0	0	0	#DIV/0!	#DIV/0!	#DIV/0!	#DIV/0!	0		#N/A
D830030K20Rik	0.524419	0.42004	0	0	0	0	0.0119947	#NUM!	#DIV/0!	#DIV/0!	0.944459		#N/A
Ffar4	0.267729	0.214438	0	0	0	0	0.0119962	#NUM!	#DIV/0!	#DIV/0!	0.482167		#N/A
Klk10	0.276819	0.221715	0	0	0	0	0.0119979	#NUM!	#DIV/0!	#DIV/0!	0.498534		#N/A
Ankrd55	0	0.0988844	0	0.198904	0.517899	0.482092	0.013349	3.3381	0.0581509	2.32984	1.29778		#N/A
Gm20556	0.308212	0.246844	0.409691	0	0	0	0.0120043	#NUM!	0.42265	#NUM!	0.964747		#N/A
4933417D19Rik	0.310621	0.248772	0	0	0	0	0.0120048	#NUM!	#DIV/0!	#DIV/0!	0.559393		#N/A
Mir6901	0	0	0	0	0	0	#DIV/0!	#DIV/0!	#DIV/0!	#DIV/0!	0		#N/A
Dync1i1	0.259288	0.207652	0.513705	0.766188	0	0	0.0120089	#NUM!	0.0367814	#NUM!	1.74683		#N/A
Tceal3	0.349548	0.279926	0	0.59106	0	0	0.0120131	#NUM!	0.42265	#NUM!	1.22053		#N/A
Mir6902	0	0	0	0	0	0	#DIV/0!	#DIV/0!	#DIV/0!	#DIV/0!	0		#N/A
Mir6345	0	0	0	0	0	0	#DIV/0!	#DIV/0!	#DIV/0!	#DIV/0!	0		#N/A
Cyp4f41-ps	0.349933	0.280234	0.931632	0	0	0	0.0120133	#NUM!	0.42265	#NUM!	1.5618		#N/A
4933413G19Rik	0.358615	0.287182	0	0.606425	0	0	0.012015	#NUM!	0.42265	#NUM!	1.25222		#N/A
Scn4a	0.298442	0.518142	0.720882	0.0419791	0	0.0808327	0.0880678	3.33659	0.423591	3.23841	1.66028		#N/A
Rab25	0.372042	0.297927	0	0	0	0	0.0120176	#NUM!	#DIV/0!	#DIV/0!	0.669969		#N/A
1810065E05Rik	0.441832	0.353764	0	0	0	0	0.0120325	#NUM!	#DIV/0!	#DIV/0!	0.795596		#N/A
1700016K19Rik	0.444301	0.35574	0	0	0	0	0.0120328	#NUM!	#DIV/0!	#DIV/0!	0.800041		#N/A
4930521E06Rik	0.453813	0.363349	0	0.38392	0	0	0.0120348	#NUM!	0.42265	#NUM!	1.20108		#N/A
B3galt1	0.316917	0.203152	0.334195	0.160493	0	0.051495	0.0642546	3.3362	0.134264	3.26401	1.06625		#N/A
Cxcl12	521.459	360.186	244.56	151.602	50.6356	36.7977	0.0391162	-3.33394	0.0815012	-2.17984	1365.24	FALSE	cell chemotaxis
Gm9994	0	0	0	0	0	0	#DIV/0!	#DIV/0!	#DIV/0!	#DIV/0!	0		#N/A
Neu4	0	0	0	0	0	0	#DIV/0!	#DIV/0!	#DIV/0!	#DIV/0!	0		#N/A
1700012D01Rik	0.649349	0.51971	0	0	0	0	0.0120747	#NUM!	#DIV/0!	#DIV/0!	1.16906		#N/A
4930440C22Rik	0	0	0	0	0	0	#DIV/0!	#DIV/0!	#DIV/0!	#DIV/0!	0		#N/A
Mtag2	0.662756	0.53043	0	0	0	0	0.0120768	#NUM!	#DIV/0!	#DIV/0!	1.19319		#N/A
Lenep	0.687225	0.549989	0	0	0	0	0.0120815	#NUM!	#DIV/0!	#DIV/0!	1.23721		#N/A
4930598F16Rik	0	0	0	0	0	0	#DIV/0!	#DIV/0!	#DIV/0!	#DIV/0!	0		#N/A
1700063A18Rik	0	0	0	0	0	0	#DIV/0!	#DIV/0!	#DIV/0!	#DIV/0!	0		#N/A
Il17c	0.708654	0.56712	0	0	0	0	0.012085	#NUM!	#DIV/0!	#DIV/0!	1.27577		#N/A
4930533P14Rik	0	0	0	0	0	0	#DIV/0!	#DIV/0!	#DIV/0!	#DIV/0!	0		#N/A
Gemin6	0	0.289137	2.40405	0	2.03377	0.877427	0.158829	3.33179	0.866772	0.276146	5.60438		#N/A
Slco6b1	0	0	0	0	0	0	#DIV/0!	#DIV/0!	#DIV/0!	#DIV/0!	0		#N/A
Hbb-bt	10.4813	8.38746	4.0418	0	0	0	0.0120911	#NUM!	0.42265	#NUM!	22.9106		#N/A
Slco6c1	0	0	0	0	0	0	#DIV/0!	#DIV/0!	#DIV/0!	#DIV/0!	0		#N/A
BC030307	0	0.123533	0	0.252184	1.23973	0	0.464842	3.32706	0.516762	2.29748	1.61545		#N/A
Ly6g6d	2.3863	1.90947	1.0753	0	0	0	0.0120978	#NUM!	0.42265	#NUM!	5.37107		#N/A
Myl7	0.826394	0.661238	0	0	0	0	0.012102	#NUM!	#DIV/0!	#DIV/0!	1.48763		#N/A
Cntnap5b	0	0	0	0	0	0	#DIV/0!	#DIV/0!	#DIV/0!	#DIV/0!	0		#N/A
4930549G23Rik	1.6968	1.35766	0	0	0	0	0.0121045	#NUM!	#DIV/0!	#DIV/0!	3.05446		#N/A
Slco6d1	0	0	0	0	0	0	#DIV/0!	#DIV/0!	#DIV/0!	#DIV/0!	0		#N/A
Gm20268	0	0	0	0	0	0	#DIV/0!	#DIV/0!	#DIV/0!	#DIV/0!	0		#N/A
Cdh20	0	0	0	0	0	0	#DIV/0!	#DIV/0!	#DIV/0!	#DIV/0!	0		#N/A
Hyal2	24.3751	20.766	17.1612	23.3672	39.0374	40.1835	0.0121221	0.81144	0.0255866	0.966948	164.89		#N/A
Pdcd1	0	0.147695	0	0.311448	1.03317	0.448824	0.157278	3.32685	0.219132	2.25048	1.94114		#N/A
Hey1	24.329	16.8154	6.51895	6.44583	3.33911	0.774395	0.043021	3.32226	0.07473	1.65616	58.2227		#N/A
Dbhos	0.7502	1.26898	0.4398	0.773994	0	0.203123	0.0826177	3.31334	0.122761	2.5791	3.4361		#N/A
BC051628	0	2.16626	1.43618	2.05702	0	0.219284	0.465573	3.30433	0.0381472	3.99368	5.87874		#N/A
Gcnt1	1.17552	0.058816	0.762182	0.248011	7.49113	4.69597	0.0679188	3.30355	0.0589943	3.59265	14.4316	TRUE	leukocyte tethering or rolling
B230319C09Rik	0.857262	0.858376	0	0.543153	0	0.173858	0.0124788	3.30276	0.583683	1.64345	2.43265		#N/A
Oscp1	0.653369	0.654284	0	0.689739	0	0.132574	0.0124913	3.30211	0.510781	2.37925	2.12997		#N/A
Ptk6	0.611291	0.61216	0	0	0	0.124049	0.0124938	3.30197	0.42265	#DIV/0!	1.3475	#DIV/0!	cell migration
Serpinb5	0	0	0	0	0	0	#DIV/0!	#DIV/0!	#DIV/0!	#DIV/0!	0		#N/A
Col22a1	0.21475	0.215098	0.353724	0	0	0.0436219	0.0125181	3.3007	0.475989	3.0195	0.827194		#N/A
AI506816	0	1.13817	0	0	0	0.115979	0.465885	3.29478	0.42265	#DIV/0!	1.25415		#N/A
Samd15	0.174455	0	0.692496	0	1.71034	0	0.465931	3.29336	0.636615	1.30441	2.57729		#N/A
Mir3473f	0	0	0	0	0	0	#DIV/0!	#DIV/0!	#DIV/0!	#DIV/0!	0		#N/A
Pdlim1	189.854	156.97	253.111	235.454	330.31	348.611	0.0125995	0.96904	0.0173831	0.474693	1514.31		#N/A
Serpinb13	0	0	0	0	0	0	#DIV/0!	#DIV/0!	#DIV/0!	#DIV/0!	0		#N/A
Pgap3	1.57649	1.49265	1.32601	1.21022	2.20597	2.09419	0.0126398	0.486556	0.00822224	0.761705	9.90553		#N/A
Serpinb3b	0	0	0	0	0	0	#DIV/0!	#DIV/0!	#DIV/0!	#DIV/0!	0		#N/A
Dok1	4.77179	4.14001	5.2646	4.70139	8.91496	8.22585	0.0126624	0.943647	0.0150405	0.78235	36.0186		#N/A
Il17rd	4.12609	3.81498	2.71721	2.94637	1.88186	2.19233	0.0126743	0.96282	0.054198	0.475201	17.6788		#N/A
1700066B19Rik	0	0.221648	0.365612	0.934451	1.16121	1.01071	0.0183534	3.29263	0.276608	0.740389	3.69363		#N/A
Serpinb3d	0	0	0	0	0	0	#DIV/0!	#DIV/0!	#DIV/0!	#DIV/0!	0		#N/A
Serpinb10	0	0	0	0	0	0	#DIV/0!	#DIV/0!	#DIV/0!	#DIV/0!	0		#N/A
D830032E09Rik	0	0	0	0	0	0	#DIV/0!	#DIV/0!	#DIV/0!	#DIV/0!	0		#N/A
Cdh7	0	0	0	0	0	0	#DIV/0!	#DIV/0!	#DIV/0!	#DIV/0!	0		#N/A
Ubd	27.3789	11.4829	55.1184	65.4348	217.109	162.875	0.0263676	3.28951	0.0424225	1.65627	539.399		#N/A
Hba-a2	0.0751343	0.0596999	0.124988	0.0557208	0	0	0.0128512	#NUM!	0.12086	#NUM!	0.315543		#N/A
Cntnap5a	0	0	0	0	0	0	#DIV/0!	#DIV/0!	#DIV/0!	#DIV/0!	0		#N/A
Cdh19	0	0	0	0	0	0	#DIV/0!	#DIV/0!	#DIV/0!	#DIV/0!	0		#N/A
Serpinb6b	2.49969	0.770167	1.52747	1.94901	24.25	7.64494	0.228553	3.28603	0.229232	3.19763	38.6413		#N/A
Ccl27a	0	0.376224	0.628118	0.795149	0	3.66163	0.466278	3.28282	0.603573	1.36328	5.46112	TRUE	cell chemotaxis
Cadm3	3.61912	1.4177	25.1395	34.8945	19.6582	29.2675	0.0469301	3.28001	0.502421	0.295187	113.997		#N/A
Gxylt2	0.392398	0	0.519592	1.1601	1.09985	2.70623	0.175018	3.27792	0.343874	1.18011	5.87817		#N/A
Creb5	1.07276	2.67395	2.99092	1.40893	0	0.387141	0.178245	3.27469	0.132719	3.50652	8.5337		#N/A
Steap4	48.3244	16.581	37.1909	16.3742	3.63505	3.07961	0.208276	3.27295	0.153371	2.99591	125.185		#N/A
A530099J19Rik	0.123837	0	0.163574	0	0.692747	0.502749	0.0419858	3.27109	0.0542669	2.86959	1.48291		#N/A
Ermap	0.0731703	0	0.0964816	0.0617617	0.408713	0.297202	0.0416732	3.27016	0.0425915	2.15735	0.937329		#N/A
Gm101	0	0	0	0	0	0	#DIV/0!	#DIV/0!	#DIV/0!	#DIV/0!	0		#N/A
Art3	18.5022	11.0684	9.3158	7.12357	0.985768	2.08952	0.0718874	3.26537	0.0321141	2.41836	49.0853		#N/A
Spred1	19.2673	18.2013	30.3761	23.2	29.4066	27.4206	0.0132874	0.6009	0.704995	0.0849921	147.872		#N/A
Gas2	1.15228	0.131873	0	0.55608	0	0.133602	0.379838	3.2648	0.537005	2.05735	1.97384		#N/A
Chrd	0.725051	0.082955	0.410121	0.349762	0	0.0840832	0.379875	3.26448	0.0226632	3.17589	1.65197		#N/A
Cxcl13	0.332375	0	0	0	2.33829	0.807951	0.214196	3.24275	0.176103	#DIV/0!	3.47862	#DIV/0!	B cell chemotaxis across high endothelial venule
Il13ra2	0.238957	0	2.53503	0.605693	1.67651	0.581403	0.213461	3.24017	0.729135	0.476107	5.63759		#N/A
Rhpn2	3.73662	3.15144	0.389314	0.664102	0.412248	0.319444	0.00913554	3.23479	0.382837	0.525767	8.67317		#N/A
Rin3	35.6233	34.8488	21.8925	24.0214	21.3653	17.7844	0.0134069	0.848051	0.245926	0.22993	155.536		#N/A
Fam13a	0.54452	0.498629	0.512937	0.525293	0.325926	0.315946	0.0134222	0.700588	0.00160195	0.693769	2.72325		#N/A
Tdrd5	0	0.0786645	0.285096	0.165769	0.301876	0.438444	0.0523241	3.23436	0.251541	0.715453	1.26985		#N/A
En1	0	0	0	0	0	0	#DIV/0!	#DIV/0!	#DIV/0!	#DIV/0!	0		#N/A
Celrr	0	0	0	0	0	0	#DIV/0!	#DIV/0!	#DIV/0!	#DIV/0!	0		#N/A
Unc5b	20.4432	24.2114	9.25155	5.83032	3.60591	1.14079	0.0124931	3.23381	0.133847	1.66782	64.4832		#N/A
Atg4d	3.27149	3.34418	2.23427	2.57156	2.208	1.92373	0.0136682	0.679141	0.26605	0.21804	15.5532		#N/A
Htr5b	0	0	0	0	0	0	#DIV/0!	#DIV/0!	#DIV/0!	#DIV/0!	0		#N/A
Myoz3	0.398505	1.11752	0.262969	0.336423	0	0.161822	0.20754	3.22781	0.132855	1.88909	2.27724		#N/A
Stra6	0.372352	0	0	0.733612	0.867929	2.62039	0.224124	3.22779	0.284118	2.24944	4.59428		#N/A
Fgf9	0.0808339	0.0647683	0.319844	0.750568	0.903242	0.459627	0.111234	3.22654	0.682817	0.348481	2.57888		#N/A
Pgm1	21.46	19.2603	27.7421	21.5301	31.3999	30.2523	0.0137601	0.598404	0.189092	0.323378	151.645		#N/A
Gpr39	0	0	0	0	0	0	#DIV/0!	#DIV/0!	#DIV/0!	#DIV/0!	0		#N/A
Lypd1	0	0	0.228811	0.146059	0	0	#DIV/0!	#DIV/0!	0.0454346	#NUM!	0.37487		#N/A
Apln	15.6682	16.4494	7.98849	9.94375	1.51047	1.9305	0.000955277	3.22248	0.018518	2.38167	53.4908		#N/A
Hba-a1	55.6391	43.7981	7.18809	7.56743	0	0	0.0138854	#NUM!	0.000660265	#NUM!	114.193		#N/A
Cx3cr1	0.537773	0.0718141	1.53725	0.226984	5.38453	0.291195	0.426314	3.2189	0.534536	1.68576	8.04955	TRUE	cell chemotaxis
C530008M17Rik	0.0959245	0	0	0.283346	0.0669278	0.818416	0.406813	3.20627	0.531692	1.64367	1.26461		#N/A
Galnt18	30.46	27.6286	20.2126	23.9071	14.2663	16.0142	0.0140177	0.939866	0.0772481	0.543034	132.489		#N/A
Gpihbp1	489.586	391.925	161.288	107.35	59.3355	36.5046	0.0159078	-3.20128	0.0982508	-1.48696	1245.99		#N/A
Acmsd	0	0	0	0	0	0	#DIV/0!	#DIV/0!	#DIV/0!	#DIV/0!	0		#N/A
Ramp3	20.0363	13.5394	2.49729	2.38167	2.64146	1.01488	0.0466314	3.19895	0.531596	0.416173	42.111		#N/A
Skint3	0.278885	0.411227	0	0	0	0.0754771	0.0563028	3.19272	0.42265	#DIV/0!	0.765589		#N/A
A930012L18Rik	11.1949	8.8507	1.55777	4.22921	1.23684	0.956585	0.0170434	3.19203	0.312783	1.39963	28.026		#N/A
Col25a1	0.0485581	0.311308	0.175615	0.0409808	0	0.0394561	0.351151	3.18914	0.334008	2.45669	0.615918		#N/A
Sulf1	4.11577	3.13892	8.64453	6.86797	29.8423	36.2931	0.0120564	3.18844	0.0170248	2.09199	88.9026		#N/A
Cnfn	0.614234	0.782891	0	0	0	0	0.0142616	#NUM!	#DIV/0!	#DIV/0!	1.39712		#N/A
Hspb8	2.17699	1.42684	10.7451	6.85414	19.9708	12.8459	0.0552108	3.18683	0.201707	0.898917	54.0198		#N/A
Mir128-1	0	0	0	0	0	0	#DIV/0!	#DIV/0!	#DIV/0!	#DIV/0!	0		#N/A
Hbb-b1	0.064189	71.1083	36.256	12.0088	0	7.81686	0.468905	3.18666	0.253277	2.62631	127.254		#N/A
Sez6	0.636161	0.387578	0	0	0.112538	0	0.0791739	3.18536	0.42265	#DIV/0!	1.13628		#N/A
Zfp639	2.80204	2.82253	4.90923	2.51954	3.79264	4.06292	0.0144422	0.481971	0.87549	0.0805908	20.9089		#N/A
Daf2	0	0	0	0	0	0	#DIV/0!	#DIV/0!	#DIV/0!	#DIV/0!	0		#N/A
Zp3r	0	0	0	0	0	0	#DIV/0!	#DIV/0!	#DIV/0!	#DIV/0!	0		#N/A
C4bp-ps1	0	0	0	0	0	0	#DIV/0!	#DIV/0!	#DIV/0!	#DIV/0!	0		#N/A
Igsf23	0.188187	0	0	0	0.791016	0.916208	0.0214308	3.18141	0.00533441	#DIV/0!	1.89541		#N/A
C4bp	0	0	0	0	0	0	#DIV/0!	#DIV/0!	#DIV/0!	#DIV/0!	0		#N/A
Csnk1d	38.1852	37.774	36.0834	28.3688	28.5361	30.5524	0.0145539	0.362347	0.570464	0.125352	199.5		#N/A
Fcamr	0	0	0	0	0	0	#DIV/0!	#DIV/0!	#DIV/0!	#DIV/0!	0		#N/A
5730420D15Rik	0	0.26717	0	0.846378	1.87836	0.540773	0.255371	3.17866	0.425119	1.51512	3.53268		#N/A
Il20	0	0	0	0	0	0	#DIV/0!	#DIV/0!	#DIV/0!	#DIV/0!	0		#N/A
Spag4	0	0.196421	0.650516	0	1.37663	0.397741	0.254783	3.17529	0.439879	1.44765	2.62131		#N/A
Il19	0	0	0	0	0	0	#DIV/0!	#DIV/0!	#DIV/0!	#DIV/0!	0		#N/A
Hsf1	9.47253	9.13425	9.28452	9.18568	11.7931	12.3851	0.0146487	0.377878	0.0108764	0.388507	61.2552		#N/A
Pcp4l1	42.2519	43.514	18.1593	12.9453	4.23398	5.27227	0.000458961	-3.17346	0.0555849	-1.71018	126.377		#N/A
Il24	0	0	0	0	0	0	#DIV/0!	#DIV/0!	#DIV/0!	#DIV/0!	0		#N/A
Osr2	3.80384	3.3856	4.47952	2.32077	1.77774	1.8858	0.0146801	0.972641	0.28382	0.892358	17.6533		#N/A
Kdm4d	0.129433	0.103698	1.02598	0	0.181041	1.89157	0.394752	3.15224	0.652137	1.01445	3.33172		#N/A
Adamts2	1.61787	1.80522	3.76944	2.75388	0.94269	0.951598	0.0147202	0.853644	0.044917	1.78395	11.8407		#N/A
Tnnt2	0	0.28175	0	0	1.98142	0.523253	0.27313	3.15213	0.227992	#DIV/0!	2.78642		#N/A
Slc10a3	3.06171	2.77087	3.70714	4.54199	4.83704	4.51481	0.0148747	0.681118	0.343061	0.18101	23.4336		#N/A
Evl	31.2935	29.1545	16.5696	17.2587	20.7343	19.4291	0.0149191	0.589813	0.0502249	0.247651	134.44		#N/A
Dlgap3	0.528244	0.564334	0.116148	0.22296	0.122997	0	0.0170326	3.15104	0.315837	1.46312	1.55468		#N/A
Ppp1r1b	0.870761	0.697509	0	0	0	0.17659	0.0301761	3.1507	0.42265	#DIV/0!	1.74486		#N/A
Khnyn	13.6868	12.5629	6.28518	8.48248	6.4138	7.45832	0.0150209	0.920113	0.748113	0.090253	54.8895		#N/A
Avpr1b	0	0	0	0	0	0	#DIV/0!	#DIV/0!	#DIV/0!	#DIV/0!	0		#N/A
Srsf12	0	0.838738	0.153601	0.491033	0	0.0944511	0.470894	3.15058	0.25696	2.77084	1.57782		#N/A
Serpina1b	0.782113	0	3.45976	2.6436	2.9284	4.01647	0.0441692	3.1505	0.599198	0.186344	13.8303		#N/A
Pm20d1	0	0	0	0	0	0	#DIV/0!	#DIV/0!	#DIV/0!	#DIV/0!	0		#N/A
Nfat5	15.624	15.7122	20.0863	24.4869	20.4038	21.7433	0.0150708	0.427603	0.650568	0.0807432	118.057		#N/A
Rho	0.419675	1.84937	0.276989	0.974342	0	0.255614	0.299973	3.15005	0.312027	2.29142	3.77599		#N/A
Cecr5	2.6145	2.54324	1.48323	1.41964	4.70966	4.24305	0.0151205	0.795585	0.00600464	1.62484	17.0133		#N/A
Rgp1	13.0274	11.5636	7.91793	7.63021	6.34841	6.47856	0.0152492	0.93895	0.0132012	0.277562	52.9661		#N/A
Sarm1	0.262834	0.210603	0.086593	0	0	0.0533662	0.0301764	3.14917	0.774942	0.698324	0.613396		#N/A
Fbxl16	0.386164	0.309405	0.127399	0.325999	0	0.0784076	0.0301856	3.14913	0.221128	2.53171	1.22737		#N/A
Nlrp10	0.297334	0.238242	0	0.188232	0	0.0603846	0.0301877	3.14884	0.584113	1.64026	0.784193		#N/A
Hopx	10.9348	4.33838	6.86394	1.56941	0.995155	0.729657	0.176577	3.14649	0.333167	2.28967	25.4313		#N/A
Ntng1	0.160214	0.256599	0.211886	1.093	2.23267	1.43067	0.0566935	3.13569	0.186326	1.48924	5.38504		#N/A
Spef2	0	0.0913227	0	0	0.796796	0	0.471839	3.12516	0.42265	#DIV/0!	0.888119		#N/A
Sec14l1	58.7458	53.2169	38.8411	44.5255	32.7503	29.88	0.0155744	0.838085	0.0827664	0.412609	257.96		#N/A
Mir135b	0	0	0	0	0	0	#DIV/0!	#DIV/0!	#DIV/0!	#DIV/0!	0		#N/A
Tns1	78.7422	78.9124	55.253	57.7625	41.7009	50.0323	0.0156064	0.781251	0.134291	0.301005	362.403	FALSE	fibroblast migration
Mapk6	36.0914	35.4779	47.9147	40.1883	53.9616	49.915	0.0156727	0.537458	0.212256	0.237608	263.549		#N/A
Rplp2	529.222	482.673	519.317	443.827	752.638	717.849	0.0156812	0.539234	0.0258073	0.610471	3445.53		#N/A
Bag3	59.3953	57.7216	51.5566	58.361	49.1814	47.1404	0.0157318	0.282015	0.19575	0.190488	323.356		#N/A
Gna14	0	0.240523	0	0.25343	2.09767	0	0.471863	3.12454	0.474789	3.04913	2.59162		#N/A
Spns2	51.3115	43.0777	64.6435	77.4107	86.9487	94.3502	0.0158437	0.941676	0.117085	0.351929	417.742	FALSE	lymphocyte migration
Gprin1	0	0.0647354	0	0.204596	0.564239	0	0.471895	3.12368	0.609865	1.46353	0.83357		#N/A
Gria3	0.573073	0.203829	1.18794	0.428144	3.74631	2.98705	0.0195051	3.11552	0.0413462	2.05882	9.12635		#N/A
Pax5	3.17127	1.26989	0	0.804203	0	0.514	0.184342	3.1111	0.789801	0.645791	5.75936		#N/A
Golt1a	0	0	0	0	0	0	#DIV/0!	#DIV/0!	#DIV/0!	#DIV/0!	0		#N/A
Kiss1	0	0	0	0	0	0	#DIV/0!	#DIV/0!	#DIV/0!	#DIV/0!	0		#N/A
Cd209a	0.248675	0	0	0.630361	1.74519	0.403326	0.298482	3.11101	0.413516	1.76909	3.02755		#N/A
Gm19461	0	0	0	0	0	0	#DIV/0!	#DIV/0!	#DIV/0!	#DIV/0!	0		#N/A
Rab11fip5	16.8008	17.1133	9.37648	11.5104	8.27427	10.2341	0.016193	0.873707	0.497968	0.174419	73.3093		#N/A
Sema7a	207.275	164.495	73.1499	51.5083	25.0469	18.0865	0.0169528	-3.10753	0.069724	-1.5311	539.562	FALSE	neural crest cell migration
Gm10538	0	0	0	0	0	0	#DIV/0!	#DIV/0!	#DIV/0!	#DIV/0!	0		#N/A
Cdk14	6.6221	3.35693	4.18692	2.73767	0.283038	0.878337	0.117274	3.10307	0.0666055	2.57589	18.065		#N/A
Slc16a11	4.71628	10.5127	2.17285	2.94472	0.287448	1.49725	0.15119	3.09307	0.14589	1.51978	22.1312		#N/A
Astn1	0.136146	0	0	0.153297	0.570669	0.590917	0.0175446	3.09287	0.02272	2.92169	1.45103	TRUE	cell migration
6430706D22Rik	5.32239	4.7033	6.68439	6.55347	7.90646	7.57104	0.0162743	0.626471	0.0248859	0.225503	38.7411		#N/A
Plekha4	1.684	0.103783	0.684548	0	0	0.210345	0.426707	3.08734	0.575957	1.70239	2.68268		#N/A
Optc	0	0	0.595371	0	0	0	#DIV/0!	#DIV/0!	0.42265	#NUM!	0.595371		#N/A
Fam13c	17.2579	19.4649	18.3851	17.9289	9.49826	9.90976	0.0163993	0.920023	0.00131801	0.903873	92.4448		#N/A
Als2	4.76828	5.01639	3.12499	3.23393	3.40606	3.05328	0.0164089	0.599136	0.811142	0.022605	22.6029		#N/A
Myog	0	0	0	0	0	0	#DIV/0!	#DIV/0!	#DIV/0!	#DIV/0!	0		#N/A
Nrg1	0.33512	0	0	0.42454	0.938523	1.90388	0.13361	3.08436	0.148891	2.74314	3.60206	TRUE	chemorepulsion involved in interneuron migration from the subpallium to the cortex
Slc1a4	0.940076	0.0684755	0.789151	0.721417	0.119385	0	0.418547	3.07859	0.00959494	3.6614	2.6385		#N/A
Slco4a1	0.220687	0.0884078	0.145683	0	2.15957	0.448027	0.312481	3.0766	0.288185	4.16182	3.06237		#N/A
4933406M09Rik	0	0	0	0	0	0	#DIV/0!	#DIV/0!	#DIV/0!	#DIV/0!	0		#N/A
Depdc1b	0.136782	0	0	0.115499	1.14817	0	0.473985	3.06939	0.46528	3.31338	1.40045	TRUE	cell migration
Kcnd1	0.363259	0.873012	0	0.460226	0	0.14739	0.176602	3.06828	0.583783	1.6427	1.84389		#N/A
Fam19a2	0.0805533	0	0.425031	0	0.675176	0	0.474069	3.06725	0.783552	0.667696	1.18076		#N/A
Baalc	0.25359	0	0.111504	0.784905	1.29889	0.82393	0.0738905	3.06541	0.275086	1.24375	3.27282		#N/A
Mir6903	0	0	0	0	0	0	#DIV/0!	#DIV/0!	#DIV/0!	#DIV/0!	0		#N/A
Tbx1	0	0.161144	0	0	1.34804	0	0.47418	3.06444	0.42265	#DIV/0!	1.50918	#DIV/0!	neural crest cell migration
Stc2	0.200277	0.320868	0.530466	0.676709	3.36852	0.974953	0.251783	3.05909	0.321037	1.84721	6.07179		#N/A
Ctsh	16.822	5.03059	11.2968	9.09557	105.074	76.4124	0.0356873	3.05399	0.0303973	3.15376	223.731		#N/A
Gm2027	0	0.0903513	0.148898	0.285628	0.472974	0.274721	0.0945335	3.04883	0.323142	0.783007	1.27257		#N/A
Rnf128	0.249914	0	0.330117	0	1.74758	0.320187	0.336409	3.04857	0.357407	2.64702	2.6478		#N/A
Ptchd4	0.332973	0.304929	0.125335	0.120435	0	0.0773034	0.0208469	3.04473	0.161647	1.66871	0.960975		#N/A
Adora2a	11.6065	7.22018	3.6088	2.53661	0.95516	1.33027	0.0640969	3.04224	0.0767617	1.42704	27.2575		#N/A
Ccdc61	5.46204	5.92829	2.09833	2.97627	3.94854	3.86066	0.0171042	0.544563	0.090236	0.621881	24.2741		#N/A
Adra1d	1.5981	1.04753	2.68855	1.96291	0.203303	0.117937	0.0529339	3.04189	0.0273094	3.85596	7.61833		#N/A
4931440L10Rik	0	0	0	0	0	0	#DIV/0!	#DIV/0!	#DIV/0!	#DIV/0!	0		#N/A
Rnf19b	36.7628	24.9639	125.875	156.943	238.614	269.389	0.00541019	3.04087	0.0357047	0.844963	852.548		#N/A
Npas3	0.168131	0	0.369278	0.425707	1.0169	0.364282	0.213671	3.03825	0.465282	0.796904	2.3443		#N/A
4930579G18Rik	0.25323	1.41982	0.671941	1.06987	0	0.205348	0.341006	3.02634	0.0754509	3.08445	3.62021		#N/A
Ly6h	0	0	0	0	1.29464	0.990634	0.0172402	#DIV/0!	0.0172402	#DIV/0!	2.28527		#N/A
Mrgprg	0.98403	0.31531	0	0.332484	0	0.159682	0.239245	3.02451	0.685528	1.05808	1.79151		#N/A
Sptan1	123.768	124.413	85.7702	88.2346	68.4377	81.5118	0.0172979	0.726916	0.212325	0.21465	572.135		#N/A
Fam72a	0.836918	0.268187	0.442844	0.565457	0	0.135849	0.23925	3.02411	0.0412906	2.89185	2.24925		#N/A
Insl6	0	0.559649	3.76889	0.592484	3.97841	0.564612	0.368606	3.02106	0.972465	0.0588696	9.46405		#N/A
Sirt2	23.2342	22.3561	28.7449	16.7482	28.6635	30.2002	0.0173193	0.368651	0.384136	0.37173	149.947		#N/A
Micall2	4.45473	6.73284	4.54332	2.13681	1.13198	0.24667	0.0568435	3.02057	0.174619	2.27662	19.2463		#N/A
Ppp1r14a	15.6089	13.2687	41.1326	66.249	107.697	126.508	0.00841571	3.01975	0.0561172	1.12503	370.464		#N/A
Gpr1	4.59191	2.55889	17.1857	13.9976	34.1385	23.8115	0.0403484	3.01863	0.131609	0.894035	96.2841		#N/A
Bmp4	6.58121	3.56229	16.2411	15.023	41.6068	40.4166	0.00203192	3.01548	0.00112379	1.39153	123.431		#N/A
Csf3r	0	0.137587	0.248429	0	0.830772	0.279093	0.22939	3.01197	0.290514	2.15948	1.49588	TRUE	neutrophil chemotaxis
Gper1	1.24226	1.21642	1.09444	1.04897	0.193114	0.112057	0.00155706	3.01019	0.00254645	2.81222	4.90726		#N/A
P2ry2	25.4864	24.0661	12.4695	12.3919	1.90888	4.25002	0.00395841	3.00821	0.015327	2.01316	80.5728		#N/A
Mir1231	0	0	0	0	0	0	#DIV/0!	#DIV/0!	#DIV/0!	#DIV/0!	0		#N/A
Igfn1	0	0	0	0	0	0	#DIV/0!	#DIV/0!	#DIV/0!	#DIV/0!	0		#N/A
Amigo2	3.74276	2.12808	6.99837	8.95961	25.6573	21.5768	0.0110692	3.00819	0.0203174	1.56555	69.0629		#N/A
Ascl5	0	0	0	0	0	0	#DIV/0!	#DIV/0!	#DIV/0!	#DIV/0!	0		#N/A
Serpinb8	0.930045	0.250736	4.91694	1.12259	6.08782	3.40388	0.0953631	3.00693	0.535011	0.65223	16.712		#N/A
Gm15850	0	0	0	0	0	0	#DIV/0!	#DIV/0!	#DIV/0!	#DIV/0!	0		#N/A
Ttc9	0.6925	0.277383	1.14531	1.02353	4.12186	3.65301	0.0083621	3.00294	0.0073838	1.84189	10.9136		#N/A
Fgf14	0.121418	0.0972789	0	0.307561	1.35841	0.39437	0.252629	3.00264	0.289421	2.5107	2.27904		#N/A
Pde4a	3.07417	2.99991	2.35659	3.01724	1.84791	1.48222	0.017996	0.867087	0.113701	0.690372	14.778		#N/A
Txlna	20.4805	19.2233	22.381	22.3881	27.4701	26.0684	0.0180239	0.4313	0.0246102	0.258073	138.011		#N/A
Gabrr1	1.39894	0.62263	0	0.262531	0	0.252336	0.162511	3.00206	0.980207	0.0571417	2.53644		#N/A
Ier2	268.063	244.314	173.59	175.277	140.98	158.056	0.0182846	0.776887	0.100939	0.222358	1160.28		#N/A
Efr3b	26.0229	19.6066	11.0325	8.20946	3.35864	2.36299	0.0254651	2.99547	0.0456871	1.74976	70.5931		#N/A
Lin7a	4.36526	1.74892	3.61851	2.50645	0.312452	0.454712	0.178078	2.99455	0.041105	2.99709	13.0063		#N/A
Siglech	0.870497	0.232466	1.5342	0.367542	6.90281	1.88441	0.268102	2.99402	0.313169	2.20809	11.7919		#N/A
Cd276	3.52158	2.99253	0.281747	0.630655	0.298332	0.519969	0.0099899	2.99286	0.841071	0.157038	8.24481		#N/A
Wdr89	0.602091	0.353587	0	0.0967195	6.19e-07	0.120542	0.0941792	2.98698	0.891643	0.317665	1.17294		#N/A
Ano7	0.0860599	0.467642	0.340652	0.281526	0	0.069902	0.33859	2.9857	0.0263984	3.15392	1.24578		#N/A
Mir181a-1	0	0	0	0	0	0	#DIV/0!	#DIV/0!	#DIV/0!	#DIV/0!	0		#N/A
Clcn6	4.34989	4.23864	2.01831	2.38225	3.45207	3.62758	0.018443	0.278733	0.0219977	0.685991	20.0687		#N/A
Mir181b-1	0	0	0	0	0	0	#DIV/0!	#DIV/0!	#DIV/0!	#DIV/0!	0		#N/A
Hdhd3	1.44917	0.870375	0	0	0	0.293472	0.0890931	2.98255	0.42265	#DIV/0!	2.61302		#N/A
Atp6v1g3	0	0	0	0	0	0	#DIV/0!	#DIV/0!	#DIV/0!	#DIV/0!	0		#N/A
Lhx9	0	0	0	0	0	0	#DIV/0!	#DIV/0!	#DIV/0!	#DIV/0!	0		#N/A
Cnpy3	20.8517	18.6602	22.132	22.5313	29.7418	31.8581	0.0184977	0.640641	0.0157875	0.463838	145.775		#N/A
Gm5833	0	0	0	0	0	0	#DIV/0!	#DIV/0!	#DIV/0!	#DIV/0!	0		#N/A
Crb1	0	0	0	0	0	0	#DIV/0!	#DIV/0!	#DIV/0!	#DIV/0!	0		#N/A
Fryl	34.1271	33.9522	28.2071	24.8205	17.2034	21.2893	0.0185758	0.822631	0.111461	0.462159	159.6		#N/A
4933436E23Rik	0	0	0	0	0	0	#DIV/0!	#DIV/0!	#DIV/0!	#DIV/0!	0		#N/A
F13b	0	0	0	0	0	0	#DIV/0!	#DIV/0!	#DIV/0!	#DIV/0!	0		#N/A
Fhl5	5.65493	1.13214	5.17586	2.6894	0	0.858962	0.32674	2.98212	0.11679	3.19483	15.5113		#N/A
Cfhr1	0	0	0	0	0	0	#DIV/0!	#DIV/0!	#DIV/0!	#DIV/0!	0		#N/A
Ciart	2.13823	2.99709	0.35478	2.03278	0	0.65013	0.0531239	2.98165	0.436166	1.87674	8.17301		#N/A
Nr4a2	9.86078	9.52029	9.90458	8.59644	7.94057	7.51502	0.0187357	0.326519	0.157269	0.259476	53.3377	FALSE	neuron migration
Cfhr2	0	0	0	0	0	0	#DIV/0!	#DIV/0!	#DIV/0!	#DIV/0!	0		#N/A
Tmem200a	0.32532	0.195497	0.214542	0.617873	0	0.0660638	0.0891031	2.97884	0.20162	3.65537	1.4193		#N/A
Dlgap1	0.233709	0.164539	0	0.0866852	0	0.050645	0.0557844	2.97518	0.753964	0.775366	0.535578		#N/A
4930596I21Rik	0	0	0	0	0	0	#DIV/0!	#DIV/0!	#DIV/0!	#DIV/0!	0		#N/A
4930402H24Rik	11.3905	10.4154	9.1864	8.25687	6.92265	6.20544	0.0189071	0.732062	0.0667042	0.410013	52.3773		#N/A
Ppfibp1	31.3097	26.824	43.3847	34.3948	48.3931	46.025	0.0189881	0.699689	0.215383	0.279673	230.331		#N/A
4930590L20Rik	0	0	0	0	0	0	#DIV/0!	#DIV/0!	#DIV/0!	#DIV/0!	0		#N/A
Mcc	24.1589	18.7236	8.10027	7.21865	2.73605	2.74641	0.0204741	2.96749	0.0079387	1.48242	63.6839		#N/A
Ephb1	3.27834	3.4075	1.03364	1.68457	0.102311	0.75265	0.0126849	2.96718	0.180147	1.66873	10.259	TRUE	cell chemotaxis
Dscaml1	0.0476032	0.0762894	0.313572	0.0401749	0.929966	0.0386806	0.443474	2.96688	0.577323	1.45325	1.44629		#N/A
Rgs13	0	0	0	0	0	0	#DIV/0!	#DIV/0!	#DIV/0!	#DIV/0!	0		#N/A
Tnfsf11	0.156663	0	0.414328	0	1.09651	0.127161	0.390715	2.96548	0.522895	1.56237	1.79466	TRUE	monocyte chemotaxis
Gata6	2.87261	1.19341	8.70777	6.9163	12.9382	18.749	0.0447585	2.96221	0.118386	1.02013	51.3773		#N/A
Nat14	1.58233	1.26748	2.39701	1.71877	0	0.366708	0.0358616	2.95816	0.0397882	3.48846	7.3323		#N/A
Plxna3	0.0471935	0.0756328	0.0621737	0.119487	0.724389	0.230087	0.235029	2.95809	0.260619	2.39346	1.25896		#N/A
Rgs21	0	0	0	0	0	0	#DIV/0!	#DIV/0!	#DIV/0!	#DIV/0!	0		#N/A
Zfp275	1.85482	1.94036	2.75745	1.94282	2.62852	2.46555	0.0194942	0.42465	0.682196	0.116075	13.5895		#N/A
Opn3	1.42437	1.141	0.808518	1.03132	0	0.330173	0.0358659	2.95787	0.0630964	2.47828	4.73538		#N/A
Brinp3	0	0	0	0	0	0	#DIV/0!	#DIV/0!	#DIV/0!	#DIV/0!	0		#N/A
Mir7652	0	0	0	0	0	0	#DIV/0!	#DIV/0!	#DIV/0!	#DIV/0!	0		#N/A
Pthlh	0.486693	0.389837	0.968244	1.02806	4.43957	2.36823	0.10358	2.95731	0.145944	1.76986	9.68063		#N/A
Lincrna-cox2	0	0	0	0	0	0	#DIV/0!	#DIV/0!	#DIV/0!	#DIV/0!	0		#N/A
Asic1	0.625458	0.501141	0.94306	0.603415	0	0.145143	0.0358859	2.95643	0.0629805	3.41344	2.81822		#N/A
Nt5e	0.188447	0.15099	1.49198	2.38627	1.31659	1.30097	0.000317202	2.94701	0.294076	0.567183	6.83525		#N/A
Pdc	0	0	0	0	0	0	#DIV/0!	#DIV/0!	#DIV/0!	#DIV/0!	0		#N/A
2310030A07Rik	0	0	0	0	0	0	#DIV/0!	#DIV/0!	#DIV/0!	#DIV/0!	0		#N/A
Ackr2	0.566461	0.181539	0.779129	0.298863	4.28987	1.47196	0.219972	2.94542	0.242974	2.41818	7.58782	TRUE	cell chemotaxis
Tgfa	0.395129	0.253279	1.04223	1.20072	1.76599	3.20967	0.0964038	2.93991	0.200619	1.14949	7.86702		#N/A
Rerg	3.06396	0.870408	2.92649	0.674095	0.238252	0.276178	0.259368	2.93509	0.304217	2.80718	8.04938		#N/A
Oit3	0.126649	0.304405	0.334606	0.320808	1.23993	2.0566	0.075559	2.93501	0.0837946	2.33047	4.383		#N/A
Naga	16.9445	16.8556	19.9646	20.7604	26.0878	29.1613	0.0199377	0.708923	0.0446095	0.440036	129.774		#N/A
Med27	8.74325	7.00837	10.4176	12.4538	14.7802	14.0602	0.0199796	0.872591	0.109778	0.334546	67.4634		#N/A
Tmem136	0.579069	0.773277	0.509442	0.244425	0	0	0.0200065	#NUM!	0.104557	#NUM!	2.10621		#N/A
Cnpy4	9.4847	10.5076	7.75075	7.50056	13.5773	13.9168	0.0200227	0.459678	0.0011845	0.850189	62.7377		#N/A
Clec14a	36.8332	30.101	45.8592	42.3001	70.0839	63.3004	0.0200648	0.994773	0.0275131	0.597404	288.478	FALSE	cell migration
Mir7682	0	0	0	0	0	0	#DIV/0!	#DIV/0!	#DIV/0!	#DIV/0!	0		#N/A
Trim8	19.4827	18.8829	20.7399	19.8969	27.2315	29.8576	0.020077	0.573402	0.0269718	0.490429	136.091		#N/A
Mgat5b	0.235614	0.251716	0.103578	0.132589	0	0.0637974	0.0232952	2.93333	0.133096	1.88824	0.787294		#N/A
Kcnmb1	0.0798394	0.0639716	0.526497	0.134787	0.446052	0.648538	0.0427305	2.92814	0.429381	0.727049	1.89968		#N/A
Clu	79.9562	87.4132	84.3376	85.4719	112.618	109.784	0.0203727	0.410134	0.00335194	0.389253	559.581		#N/A
Cd33	0.55716	0	0	0	3.89795	0.339231	0.41441	2.92694	0.355949	#DIV/0!	4.79434		#N/A
Apobec4	0	0	0	0	0	0	#DIV/0!	#DIV/0!	#DIV/0!	#DIV/0!	0		#N/A
Klf3	30.4603	27.0607	13.756	21.6479	16.2508	14.3213	0.0203986	0.911873	0.612346	0.211693	123.497		#N/A
Hic2	2.28099	2.07699	1.36614	2.75639	1.44696	1.34791	0.020406	0.640878	0.441345	0.560749	11.2754		#N/A
Samsn1	1.74533	0.310696	3.59472	3.43992	11.6856	3.93372	0.227489	2.9254	0.383541	1.15078	24.71		#N/A
Cbwd1	1.64595	1.58405	2.17848	2.58903	2.04954	2.18106	0.0204584	0.389328	0.339094	0.172374	12.2281		#N/A
Rapgef4	10.9706	12.8267	6.22011	4.85846	2.39116	0.744766	0.0141153	2.92383	0.0653449	1.82081	38.0118		#N/A
Ms4a4c	0.209514	0.167831	1.38777	0	2.34989	0.509914	0.309818	2.92196	0.588389	1.04315	4.62492		#N/A
Serpina3g	10.0766	6.9394	28.5395	30.0114	66.3598	62.4067	0.00203323	2.91979	0.00358964	1.13699	204.333		#N/A
Agpat4	8.76695	7.91962	8.14812	12.2891	12.0216	12.8656	0.020613	0.576716	0.402794	0.284205	62.011		#N/A
Tma16	1.44096	0.288483	0.479707	1.21836	8.11645	4.96086	0.0775799	2.91869	0.0724145	2.9451	16.5048		#N/A
C230024C17Rik	0	0	0	0.0857181	0	0	#DIV/0!	#DIV/0!	0.42265	#NUM!	0.0857181		#N/A
Kcna6	0.282208	0.135679	0.223143	0.71455	1.73315	1.42161	0.0154579	2.91635	0.062487	1.75034	4.51034		#N/A
Cldn15	18.1625	13.466	3.83735	5.22265	3.24914	0.940657	0.0345036	2.91627	0.212176	1.11263	44.8783		#N/A
Rgsl1	0	0	0	0	0	0	#DIV/0!	#DIV/0!	#DIV/0!	#DIV/0!	0		#N/A
Tmem132e	0	0.0653329	0	0.0688287	0.227784	0.264932	0.0295592	2.91487	0.0324002	2.83967	0.626878		#N/A
Gm5531	0	0	0	0	0	0	#DIV/0!	#DIV/0!	#DIV/0!	#DIV/0!	0		#N/A
5830403L16Rik	0	0	0	0	0	0	#DIV/0!	#DIV/0!	#DIV/0!	#DIV/0!	0		#N/A
Teddm1	0	0	0	0	0	0	#DIV/0!	#DIV/0!	#DIV/0!	#DIV/0!	0		#N/A
Ptpla	4.2043	1.49606	0.624331	1.18569	0	0.756035	0.220749	2.91453	0.379397	1.25948	8.26642		#N/A
Gpr17	1.14754	2.14549	0.0840357	1.45284	0.178004	0.258971	0.104063	2.91379	0.506634	1.81438	5.26688		#N/A
Zfp648	0	0	0	0	0	0	#DIV/0!	#DIV/0!	#DIV/0!	#DIV/0!	0		#N/A
4930452N14Rik	0	0	0	0	0	0	#DIV/0!	#DIV/0!	#DIV/0!	#DIV/0!	0		#N/A
4930532M18Rik	0	0	0	0	0	0	#DIV/0!	#DIV/0!	#DIV/0!	#DIV/0!	0		#N/A
Slc37a1	0.583288	0.37386	2.78147	3.15746	3.10804	4.10464	0.025493	2.91372	0.354316	0.280332	14.1088		#N/A
Ugt1a7c	0.642161	0.16496	1.19585	0.534922	4.31657	1.74857	0.181739	2.90968	0.243759	1.80913	8.60303		#N/A
Mir8114	0	0	0	0	0	0	#DIV/0!	#DIV/0!	#DIV/0!	#DIV/0!	0		#N/A
Sspo	0.206736	0.231935	0.571437	1.0118	0.80712	2.48686	0.231296	2.90862	0.428402	1.05695	5.31589		#N/A
Mknk2	32.8785	32.394	32.1171	34.4166	52.1748	47.1744	0.0210508	0.606033	0.0269958	0.578423	231.155		#N/A
Wdr86	4.22444	0.322289	0.799248	0.339855	0.281961	0.326421	0.419121	2.90178	0.369128	0.904849	6.29421		#N/A
Jup	55.6691	50.6528	18.9358	14.9734	8.31758	5.91545	0.00362783	-2.90112	0.0512338	-1.25243	154.464	FALSE	cell migration
Gm12216	6.71772	11.0287	2.23451	6.81496	0.472647	1.90507	0.0773662	2.89988	0.298979	1.92826	29.1736		#N/A
Abca7	7.66482	6.66029	3.40995	4.53659	3.75063	3.80151	0.0213499	0.923589	0.759948	0.0734413	29.8238		#N/A
Fxyd6	2.00403	1.44482	0.265401	2.87783	13.2018	12.5198	0.00156431	2.89879	0.0140004	3.03266	32.3137		#N/A
Prox1	0.323665	0.518674	0.533617	1.09285	3.05155	3.22066	0.00225217	2.8965	0.0154497	1.94723	8.74102	TRUE	hepatocyte cell migration
Kazn	9.41525	9.82822	4.67511	5.3943	0.9305	1.65569	0.00250062	2.89547	0.018123	1.96108	31.8991		#N/A
Oaz1-ps	91.354	79.248	33.9176	77.6297	44.3893	44.9074	0.0214969	0.933956	0.661355	0.320977	371.446		#N/A
Epb4.1l4b	0.23036	0.0922818	1.06465	0.291736	1.93246	0.467642	0.293453	2.89509	0.592979	0.823328	4.07913		#N/A
Fst	0.149166	0.239007	0.394401	0.503861	1.6701	1.21085	0.0334807	2.89177	0.0522926	1.68134	4.16738		#N/A
Clca1	1.80624	1.17582	1.0434	1.90621	14.2044	7.8837	0.0950371	2.88889	0.0954613	2.90467	28.0198		#N/A
Morn1	0.436876	0.874879	0.578929	0.184538	0	0.177195	0.138335	2.88809	0.307917	2.10723	2.25242		#N/A
Cdx1	1.23511	0	0	0.173892	0	0.167006	0.481748	2.88667	0.979809	0.0582916	1.57601		#N/A
Meox1	43.8219	37.7781	61.9418	53.2325	82.9076	73.4575	0.0217782	0.938277	0.0850994	0.4411	353.139		#N/A
Klrb1b	0.95075	0	0.419103	0	0	0.128616	0.481779	2.886	0.575722	1.70423	1.49847		#N/A
Clec1b	1.31847	0	1.77755	1.11459	7.41989	2.30169	0.252816	2.88233	0.316756	1.74905	13.9322		#N/A
Elmo1	16.3934	16.2721	15.3721	16.93	20.5784	19.4752	0.0218302	0.294164	0.0556353	0.310304	105.021	FALSE	cell migration
Vstm4	9.64821	4.41712	8.60681	4.12609	1.40193	0.508686	0.149128	2.88003	0.141389	2.73645	28.7088		#N/A
Gpx7	10.7182	10.0988	5.44874	5.3294	7.09324	6.13143	0.0219589	0.65453	0.127582	0.295123	44.8198		#N/A
Tnr	0	0	0	0	0	0	#DIV/0!	#DIV/0!	#DIV/0!	#DIV/0!	0		telencephalon cell migration
Kcnj15	2.97304	2.46972	11.5839	11.3627	22.323	17.7288	0.0173696	2.87946	0.0653023	0.803587	68.4412		#N/A
Mir488	0	0	0	0	0	0	#DIV/0!	#DIV/0!	#DIV/0!	#DIV/0!	0		#N/A
Ldlrad3	5.40732	5.91432	5.20831	4.41966	8.75283	8.0871	0.0222315	0.572803	0.0198707	0.806583	37.7895		#N/A
Cyp2a5	7.16123	1.51848	0.279036	0	1.18121	0	0.323055	2.87738	0.534749	2.08174	10.14		#N/A
Pacsin3	1.72951	1.69267	1.41148	1.94715	0	0.466999	0.0242189	2.87342	0.0554255	2.84638	7.24781		#N/A
Scarna3a	0	0	0	0	0	0	#DIV/0!	#DIV/0!	#DIV/0!	#DIV/0!	0		#N/A
Mir1843b	0	0	0	0	0	0	#DIV/0!	#DIV/0!	#DIV/0!	#DIV/0!	0		#N/A
Wdtc1	6.72847	6.54647	6.86693	7.5052	8.05529	8.52365	0.0223562	0.320646	0.108206	0.206078	44.226		#N/A
Styk1	0.200446	0	0	0	0.980459	0.48837	0.13965	2.87338	0.0962997	#DIV/0!	1.66928		#N/A
Xylt2	12.1512	10.6857	5.99739	6.25499	6.21261	5.29536	0.0225059	0.988733	0.516409	0.0904287	46.5973		#N/A
Gli2	0.733485	0.431012	0.901941	0.536494	0	0.158932	0.0986679	2.87323	0.0848427	3.17802	2.76186		#N/A
Aplp2	262.714	210.305	301.052	273.831	430.159	410.057	0.0225796	0.828862	0.0158785	0.547492	1888.12		#N/A
Gpr52	0	0	0	0	0	0	#DIV/0!	#DIV/0!	#DIV/0!	#DIV/0!	0		#N/A
Nmnat2	0.14729	0.53108	0.679762	0.932436	2.57106	2.39302	0.00960502	2.87138	0.00839695	1.6225	7.25465		#N/A
Fam57b	15.6919	13.2898	6.91518	5.1743	0.209157	3.7607	0.0281509	2.86798	0.176496	1.60659	45.041		#N/A
Il9r	0.441758	0.176969	0.583239	0.559713	3.70535	0.806729	0.312845	2.86642	0.365063	1.98103	6.27376		#N/A
Tpd52l1	0	0.239873	0	0	1.26301	0.48552	0.20488	2.8658	0.153464	#DIV/0!	1.9884		#N/A
Tradd	5.92998	6.26086	2.50471	5.01121	4.92127	5.02647	0.0231308	0.293357	0.434628	0.404419	29.6545		#N/A
Klhl26	2.66508	2.40247	2.19308	1.70594	3.57024	3.4264	0.0232545	0.465374	0.0258498	0.843551	15.9632		#N/A
Prom1	7.0587	4.92069	3.66868	3.30642	1.234	0.411575	0.0457905	2.86389	0.0272754	2.08362	20.6001		#N/A
Itih5	49.4089	35.5669	39.5355	22.9682	6.83585	4.85151	0.0345305	-2.8621	0.0930174	-2.41899	159.167		#N/A
Fam131b	0	0.0662016	0.436412	0	0.346571	0.134324	0.203151	2.86078	0.93532	0.140031	0.983509		#N/A
Snord47	0	0	0	0	0	0	#DIV/0!	#DIV/0!	#DIV/0!	#DIV/0!	0		#N/A
Tcte1	0	0.0888703	0	0.0936472	0.465195	0.180148	0.20338	2.86029	0.20733	2.78476	0.82786		#N/A
Ankrd45	0	0	0	0	0	0	#DIV/0!	#DIV/0!	#DIV/0!	#DIV/0!	0		#N/A
4930469G21Rik	0	0	0	0	0	0	#DIV/0!	#DIV/0!	#DIV/0!	#DIV/0!	0		#N/A
Cacng1	0.956148	2.29726	1.27142	0.269414	0.448261	0	0.185729	2.85954	0.424453	1.7813	5.2425		#N/A
Osbp2	0	0.0654672	0	0	0.34238	0.132738	0.203149	2.85944	0.151625	#DIV/0!	0.540585		#N/A
Tnfsf4	0	0	0	0	0	0	#DIV/0!	#DIV/0!	#DIV/0!	#DIV/0!	0		#N/A
Lgr4	2.09595	1.7844	5.0079	2.98531	3.74924	3.35237	0.0236658	0.871959	0.707502	0.170629	18.9752		#N/A
Alox12	5.36487	2.92652	1.20578	1.44558	0.957532	0.18538	0.107724	2.8589	0.203079	1.21402	12.0857		#N/A
Il18r1	0.0804453	0.064457	0	0	0.561806	0.489371	0.00663283	2.85885	0.00471482	#DIV/0!	1.19608		#N/A
4930558K02Rik	0	0	0	0	0	0	#DIV/0!	#DIV/0!	#DIV/0!	#DIV/0!	0		#N/A
Bsn	0	0.0485914	0	0.0170555	0.25364	0.0985695	0.20266	2.85766	0.164731	4.36812	0.417856		#N/A
Hhex	8.32673	10.5747	12.6423	11.8375	16.5113	16.9714	0.0238801	0.82492	0.0104373	0.451824	76.8639		#N/A
7420461P10Rik	0	0	0	0	0	0	#DIV/0!	#DIV/0!	#DIV/0!	#DIV/0!	0		#N/A
Abl1	20.7001	21.0132	15.7101	15.7918	13.0264	15.1366	0.023901	0.566706	0.254656	0.161638	101.378	FALSE	endothelial cell migration
Gm16576	0.489316	0.588121	0.0806178	0.258121	0	0.14908	0.0351686	2.85344	0.499222	1.18409	1.56526		#N/A
Krt23	3.09946	1.71877	0	0	0.669087	0	0.113855	2.84824	0.42265	#DIV/0!	5.48732		#N/A
Hist1h3d	0	0.850602	0	1.80621	6.11204	0	0.483686	2.8451	0.56894	1.75869	8.76885		#N/A
Tshr	0	0	0	0	0.432553	0.314485	0.0240806	#DIV/0!	0.0240806	#DIV/0!	0.747038		#N/A
Mroh9	0	0	0	0	0	0	#DIV/0!	#DIV/0!	#DIV/0!	#DIV/0!	0		#N/A
Tbcd	7.72058	8.04189	6.90294	7.53109	8.98777	9.1976	0.0241803	0.206285	0.0297818	0.333304	48.3819		#N/A
Trpc3	3.19006	1.5336	1.32282	1.61578	0.50938	0.148058	0.138601	2.84498	0.0391558	2.1602	8.3197		#N/A
Chp2	4.28061	4.48296	19.2724	28.3926	35.6709	27.2152	0.0235628	2.84315	0.345615	0.399811	119.315		#N/A
Lingo3	0.098393	0.473009	0	0.332257	0	0.0799104	0.328053	2.83805	0.537146	2.05584	0.983569		#N/A
Itfg3	5.46768	5.90299	8.27477	6.57376	10.0428	8.91395	0.0245048	0.737394	0.181833	0.352392	45.176		#N/A
Mettl11b	0	0	0	0	0	0	#DIV/0!	#DIV/0!	#DIV/0!	#DIV/0!	0		#N/A
Casq1	1.90555	0.305299	0.504549	0	0	0.309239	0.363614	2.83781	0.772733	0.706272	3.02464		#N/A
Pcdhga4	1.68821	1.72677	1.60285	2.1596	2.05835	2.18488	0.0245694	0.313286	0.48839	0.17349	11.4207		#N/A
Rnft2	0.383872	0.061441	0.6075	0.388848	0	0.0622899	0.363737	2.83775	0.0544508	3.99958	1.50395		#N/A
Pqlc1	32.1892	30.0391	26.5749	32.0434	19.7408	22.1741	0.0246131	0.570108	0.107999	0.483888	162.762		#N/A
Mir199a-2	0	0	0	0	0	0	#DIV/0!	#DIV/0!	#DIV/0!	#DIV/0!	0		#N/A
Mir214	0	0	0	0	0	0	#DIV/0!	#DIV/0!	#DIV/0!	#DIV/0!	0		#N/A
Ecscr	77.9424	73.6643	94.8776	78.9589	105.278	115.479	0.0246473	0.542126	0.131171	0.344728	546.2		#N/A
Fam83f	0.228129	0.0913882	0.602457	0.0963029	1.91369	0.370494	0.332388	2.83771	0.431921	1.70881	3.30246		#N/A
Ptprr	4.41884	1.54883	3.83221	2.33205	0.386373	0.44841	0.215673	2.83769	0.0710174	2.88445	12.9667		#N/A
Ccdc3	1.68537	1.14254	2.91171	2.6272	8.52287	11.6837	0.0324095	2.83702	0.0437647	1.86715	28.5734		#N/A
Fancd2	0.417045	0.38986	0.641483	0.352012	0	0.112934	0.0268925	2.83692	0.105226	3.13703	1.91333		#N/A
Gm13807	0.291807	0.233713	1.93833	0.739884	3.28074	0.47308	0.369234	2.83654	0.758247	0.487088	6.95755		#N/A
Met	0.937151	1.14617	3.31423	3.57996	8.74146	6.13193	0.039433	2.83578	0.0932034	1.10928	23.8509	TRUE	muscle cell migration
Gm20743	0	0	0	0	0	0	#DIV/0!	#DIV/0!	#DIV/0!	#DIV/0!	0		#N/A
Kcne3	1.56207	2.55952	1.53972	0	0	0.577773	0.091511	2.83463	0.617795	1.41409	6.23908		#N/A
Clasp1	6.74071	6.88148	6.90425	7.71147	5.43403	5.79256	0.0248905	0.279039	0.061701	0.380601	39.4645		#N/A
Slc16a9	1.42051	0.227631	2.99912	2.55825	6.88101	4.84561	0.0506664	2.83088	0.0975659	1.07731	18.9321		#N/A
4930568G15Rik	0	0	0	0	0	0	#DIV/0!	#DIV/0!	#DIV/0!	#DIV/0!	0		#N/A
Tbx19	0	0	0.341994	0.327865	0	0	#DIV/0!	#DIV/0!	0.000444597	#NUM!	0.669859		#N/A
Tubb4a	4.24453	2.26695	2.49462	3.31899	0.660193	0.255201	0.109214	2.83052	0.0334091	2.66697	13.2405		#N/A
Mast2	6.11475	6.89867	9.67367	10.9775	9.75051	10.6484	0.0250714	0.648492	0.888034	0.0177315	54.0635		#N/A
AU021092	13.0823	6.54889	25.6906	30.4028	70.4373	68.7219	0.00317847	2.82552	0.00362479	1.31083	214.884		#N/A
Sox11	0.617001	0.648919	0.0507882	0.227803	0.0537965	0.125349	0.00515721	2.82098	0.654397	0.637018	1.72366		#N/A
Kank1	6.84252	7.24513	20.7754	25.2151	46.2242	53.3091	0.00682689	2.82075	0.0235275	1.11384	159.611	TRUE	glomerular visceral epithelial cell migration
Dtna	0.169645	0	0.671347	0	0.896656	0.301042	0.238785	2.81967	0.61693	0.835134	2.03869		#N/A
Sipa1l2	19.255	20.8064	10.1347	8.10356	2.08922	3.60722	0.00396559	2.81408	0.0385301	1.67884	63.9961		#N/A
D16Ertd472e	3.15933	2.33762	6.51676	6.01885	5.29806	5.59207	0.0252001	0.986318	0.104489	0.203011	28.9227		#N/A
Gnaz	0.713051	0.914021	0.753964	0.361272	0	0.231542	0.0450319	2.81293	0.19214	2.268	2.97385		#N/A
Lrrc45	2.25346	2.59523	4.46741	4.16253	4.13835	4.68782	0.025461	0.864193	0.784381	0.032437	22.3048		#N/A
1810019D21Rik	0	0.217353	0	0	1.52464	0	0.485357	2.81036	0.42265	#DIV/0!	1.74199		#N/A
Mael	0	0	0	0	0	0	#DIV/0!	#DIV/0!	#DIV/0!	#DIV/0!	0		#N/A
Sdk1	0.0382747	0.153352	0.0504087	0.193802	0.533946	0.808691	0.0609174	2.8087	0.0712069	2.45887	1.77847		#N/A
Dstyk	6.89495	5.97845	4.27125	4.69006	3.66224	3.55374	0.0255944	0.835126	0.056306	0.312514	29.0507		#N/A
Mau2	8.31481	8.19162	8.4412	7.48452	7.39281	7.60595	0.0256409	0.138185	0.444105	0.0865154	47.4309		#N/A
Gm4847	0	0	0	0	0	0	#DIV/0!	#DIV/0!	#DIV/0!	#DIV/0!	0		#N/A
Gm4846	0	0	0	0	0	0	#DIV/0!	#DIV/0!	#DIV/0!	#DIV/0!	0		#N/A
Fmo9	0	0	0	0	0	0	#DIV/0!	#DIV/0!	#DIV/0!	#DIV/0!	0		#N/A
Cyp26a1	0	0.161655	0	0	1.13144	0	0.485513	2.80717	0.42265	#DIV/0!	1.2931		#N/A
Usp11	1.26851	1.01636	1.15895	1.56513	1.90902	1.98122	0.0256693	0.767747	0.10568	0.51409	8.89919		#N/A
Fgd2	0.525866	0.210698	0	0.555493	3.86504	1.28189	0.232199	2.80483	0.22439	3.21187	6.43899		#N/A
Icmt	8.74663	7.59236	10.2767	9.04275	11.7424	11.6679	0.0257279	0.518825	0.0804506	0.277089	59.0687		#N/A
5330426P16Rik	3.16063	3.16484	3.139	4.33842	1.66111	2.08358	0.0257685	0.756326	0.0991061	0.997694	17.5476		#N/A
Zfp709	0.168701	0	0	0.142407	1.17829	0	0.485661	2.80415	0.47481	3.0486	1.4894		#N/A
Shc4	0.068905	0	0	0	0.481051	0	0.485693	2.80351	0.42265	#DIV/0!	0.549956		#N/A
Morn4	0.394834	0.158144	0.26142	0.833793	1.93675	1.92212	0.00510625	2.80288	0.0403419	1.81697	5.50706		#N/A
Rgs8	0	0.0455089	0	0	0.317092	0	0.485832	2.80068	0.42265	#DIV/0!	0.362601		#N/A
Tg	0	0.0309572	0	0	0.215579	0	0.485872	2.79987	0.42265	#DIV/0!	0.246536		#N/A
Ptprd	0	0.0285597	0.281612	0.0300769	0.198865	0	0.485878	2.79974	0.758559	0.648317	0.539114		#N/A
Prg4	0.37884	0.0625581	0.514831	0.479988	0	0.0634217	0.361995	2.79903	0.00598202	3.97139	1.49964		#N/A
Vps45	1.83901	1.99956	2.77682	2.55104	3.67488	3.19944	0.0262535	0.840648	0.0989406	0.367661	16.0407		#N/A
9130008F23Rik	0.162757	0.130388	0	0.824719	1.36724	0.660499	0.133772	2.79019	0.383395	1.2979	3.1456		#N/A
Lrrc52	0	0	0	0	0	0	#DIV/0!	#DIV/0!	#DIV/0!	#DIV/0!	0		#N/A
Lmx1a	0	0	0	0	0	0	#DIV/0!	#DIV/0!	#DIV/0!	#DIV/0!	0		#N/A
Mir6348	0	0	0	0	0	0	#DIV/0!	#DIV/0!	#DIV/0!	#DIV/0!	0		#N/A
Tbc1d14	3.455	3.21287	3.07742	3.4159	5.91946	5.21989	0.0263315	0.740367	0.026858	0.778637	24.3005		#N/A
Pitpnm2os1	0	1.2621	0	0	0	0.182577	0.486397	2.78925	0.42265	#DIV/0!	1.44468		#N/A
Uckl1os	0	0.983689	1.39268	1.03709	0	0.142358	0.486426	2.78868	0.0269128	4.09322	3.55582		#N/A
Fstl1	56.2394	48.7285	97.2592	66.4826	97.5088	86.7262	0.0263988	0.811599	0.593927	0.170125	452.945		#N/A
Bgn	79.651	54.9463	224.241	177.682	467.042	462.896	0.000990535	2.78849	0.00774597	1.21022	1466.46		#N/A
Fan1	0.972495	0.857107	2.31008	0.738884	0.543594	0.473895	0.0264647	0.846517	0.325606	1.58331	5.89605		#N/A
Sh2d1b2	0	0	0	0	0	0	#DIV/0!	#DIV/0!	#DIV/0!	#DIV/0!	0		#N/A
Lmcd1	38.8417	31.7832	43.9852	43.22	64.4086	59.1256	0.0266621	0.806662	0.0209159	0.502424	281.364		#N/A
Klhl40	0	0.79266	0.373614	0	0	0.114743	0.486445	2.7883	0.575861	1.70314	1.28102		#N/A
3110045C21Rik	0	0	0	0	0	0	#DIV/0!	#DIV/0!	#DIV/0!	#DIV/0!	0		#N/A
Tmem42	1.89344	1.94664	3.02756	5.61044	3.28976	2.90088	0.0267686	0.688952	0.447685	0.480609	18.6687		#N/A
Fes	17.9093	18.3344	10.8425	10.501	10.61	12.7237	0.0267753	0.635315	0.450749	0.128618	80.9209	FALSE	cell migration
Nthl1	1.45414	2.03784	1.45245	0.922144	0	0	0.0268216	#NUM!	0.0464282	#NUM!	5.86657		#N/A
Adamts3	0.0431141	0.0345479	0	0	0.360925	0.175172	0.132582	2.78721	0.102014	#DIV/0!	0.613759		#N/A
Adnp	13.876	14.5895	10.4405	10.7408	11.6244	10.9429	0.0268615	0.334981	0.203795	0.0914427	72.2141		#N/A
1700034J05Rik	0.696103	0.975888	0.460522	0.293959	0	0	0.0268777	#NUM!	0.0454409	#NUM!	2.42647		#N/A
Fcrlb	0	0	0	0	0	0	#DIV/0!	#DIV/0!	#DIV/0!	#DIV/0!	0		#N/A
C530005A16Rik	0.570185	0.228403	0.565218	0.60185	0	0.115719	0.198962	2.78683	0.0130681	3.33419	2.08137		#N/A
Map3k14	6.57158	5.45814	7.2932	7.17074	9.40258	9.89502	0.0269326	0.681818	0.0108419	0.415961	45.7913		#N/A
Zfp707	2.369	2.21402	0.52284	0.166759	1.38339	1.60176	0.0269539	0.618495	0.0315521	2.11397	8.25777		#N/A
Cox4i2	20.1143	12.1968	9.00565	8.25806	1.72923	2.95526	0.0747901	2.78607	0.012782	1.88178	54.2593		#N/A
Tanc1	28.2166	29.4453	24.8064	22.9907	13.6325	17.849	0.0270067	0.873114	0.0708603	0.602419	136.94		#N/A
Mir6546	0	0	0	0	0	0	#DIV/0!	#DIV/0!	#DIV/0!	#DIV/0!	0		#N/A
Fkbp1b	0	0.986005	0.547533	1.73578	3.4731	3.32334	0.0282198	2.78511	0.06376	1.57365	10.0658		#N/A
Sntb2	24.8036	26.8814	36.9832	44.6095	40.2193	45.5648	0.0271414	0.730965	0.696751	0.0722702	219.062		#N/A
Col8a1	7.52038	6.02591	4.61489	2.68127	1.17664	0.790052	0.0173111	2.78405	0.113966	1.89137	22.8091		#N/A
Prpf31	6.38834	6.33293	6.28954	6.0333	9.89883	8.88084	0.0271688	0.561929	0.025428	0.607837	43.8238		#N/A
Apoa2	0	0	0	0	0	0	#DIV/0!	#DIV/0!	#DIV/0!	#DIV/0!	0		#N/A
Lysmd4	2.52663	2.69188	1.21321	1.6865	1.44825	1.74614	0.0271749	0.708097	0.650849	0.139632	11.3126		#N/A
Fads3	7.36899	6.07046	5.7539	4.29347	0.870383	1.09574	0.0129395	2.77305	0.0318481	2.35339	25.4529		#N/A
Nr1i3	0	0	0	0	0	0	#DIV/0!	#DIV/0!	#DIV/0!	#DIV/0!	0		#N/A
Kcnab1	0	0.288871	0.317454	1.31917	1.68062	0.292761	0.3567	2.77217	0.862204	0.269947	3.89888		#N/A
Shisa5	114.548	90.5044	106.717	117.577	194.835	179.43	0.0273165	0.868068	0.0154305	0.738669	803.611		#N/A
Myo1a	0.303056	0	0.266658	0	1.97654	0.0820408	0.456778	2.76399	0.447827	2.94859	2.62829		#N/A
Tbx6	0.631874	1.6872	0.558072	0.889645	0	0.34174	0.216604	2.76258	0.145865	2.08281	4.10853		#N/A
Uchl1	23.6369	22.4449	18.8707	16.2716	19.0073	18.0571	0.0274081	0.314163	0.559166	0.0768255	118.288		#N/A
Usp24	5.53627	4.85307	7.32976	5.54948	7.29497	7.18401	0.0274692	0.478856	0.464445	0.168913	37.7476		#N/A
Ammecr1l	6.77976	6.4285	7.77483	5.95904	5.23972	4.84218	0.0276058	0.389673	0.188394	0.445971	37.024		#N/A
Tomt	0	0.445049	0	0.234546	2.34298	0.675867	0.274313	2.76196	0.239979	3.68605	3.69844		#N/A
Raph1	5.67322	6.233	3.47711	5.02848	3.93199	4.23344	0.0276924	0.544115	0.849536	0.0588825	28.5772		#N/A
Tnfrsf18	0	0.850366	1.42291	0	4.46766	1.29108	0.274085	2.7596	0.339023	2.01691	8.03202		#N/A
Tmigd1	3.01352	2.19424	1.09118	0.463034	0.769612	0	0.0585686	2.75846	0.51241	1.01398	7.53159		#N/A
Aph1c	0.0638544	0.153496	0.084171	0.646744	0.891452	0.570651	0.0647319	2.74995	0.376087	1.00027	2.41037		#N/A
Tstd1	0	0	0	0	0	0	#DIV/0!	#DIV/0!	#DIV/0!	#DIV/0!	0		#N/A
Serpinh1	299.404	258.196	199.846	186.427	156.297	159.139	0.027883	0.821883	0.0355101	0.292274	1259.31		#N/A
Rabl2	3.5314	4.24313	2.92501	2.05108	0.619074	0.537108	0.011516	2.74939	0.048957	2.10564	13.9068		#N/A
Itln1	0	0	0	0	0	0	#DIV/0!	#DIV/0!	#DIV/0!	#DIV/0!	0		#N/A
Snhg3	8.1955	6.55936	15.0448	4.65395	0	2.19523	0.0443804	2.74875	0.241091	3.16566	36.6488		#N/A
Clec12a	0.788363	0.252632	1.66805	0	6.84239	0.12798	0.471556	2.74327	0.523542	2.06307	9.67942		#N/A
D3Bwg0562e	0.11595	0	0	0.0489312	0.72831	0.0471035	0.440623	2.74146	0.398893	3.98614	0.940295		#N/A
Slc4a11	0.424578	0	0.420356	1.52341	1.63204	1.20679	0.0567328	2.74119	0.528015	0.546442	5.20717		#N/A
Kcne4	13.0983	4.40061	6.88725	6.66004	0.788257	1.82939	0.231452	2.74092	0.00937275	2.37166	33.6638		#N/A
Camk2n1	3.91907	3.36438	1.60061	2.20561	1.69494	1.97046	0.0280754	0.990651	0.851867	0.0543883	14.7551		#N/A
Pdzd9	1.35341	0.180683	0	0	0	0.229802	0.389034	2.73892	0.42265	#DIV/0!	1.76389		#N/A
Grina	25.6487	22.0866	38.231	28.1679	37.4621	41.4406	0.0281239	0.725018	0.367278	0.248915	193.037		#N/A
Tssk3	0.76743	3.37994	0	2.59586	0	0.621519	0.319615	2.73833	0.536539	2.06234	7.36475		#N/A
Mir7683	0	0	0	0	0	0	#DIV/0!	#DIV/0!	#DIV/0!	#DIV/0!	0		#N/A
Dmp1	0.373403	0.299164	0.986457	0.630556	0	0.101061	0.0449246	2.73445	0.0547186	4.00003	2.39064		#N/A
Pgm5	3.68041	3.34239	7.433	9.00732	24.133	22.5969	0.00156537	2.73423	0.00523201	1.50711	70.193		#N/A
Mboat2	3.19063	1.01953	0.323729	0.537222	0.533918	0.103323	0.24783	2.72396	0.687365	0.434092	5.70835		#N/A
Serinc5	7.401	7.52499	6.80407	9.65868	10.7659	9.80256	0.0283765	0.462607	0.306112	0.321228	51.9572		#N/A
Tas1r3	0.961613	1.61799	0.380691	0.568253	0	0.390498	0.103219	2.72376	0.326341	1.28101	3.91905		#N/A
Atp1a4	0	0	0	0	0	0	#DIV/0!	#DIV/0!	#DIV/0!	#DIV/0!	0		#N/A
Atp2b2	0	0.0760484	0.0625042	0.160206	0.463569	0.0385514	0.427761	2.72304	0.587332	1.17287	0.800879		#N/A
Arhgef26	1.33558	1.78362	0.335334	0.805195	0.266364	0.20668	0.0279592	2.72113	0.294131	1.26966	4.73277		#N/A
Lrrc3b	12.2409	9.45519	2.31732	1.29266	2.75885	0.53195	0.0355566	2.72092	0.908318	0.133552	28.5969		#N/A
Prr11	0.965773	0.914511	0.115827	0.370574	0	0.285251	0.0314656	2.72065	0.651418	0.769914	2.65194		#N/A
Snrpa1	10.3488	9.75096	4.44993	8.48994	6.84663	5.67407	0.0288584	0.682863	0.929716	0.0475079	45.5603		#N/A
Nipal2	0	0.211158	0.579455	0.0741557	1.10452	0.285408	0.298123	2.71862	0.524184	1.08851	2.2547		#N/A
Klk1	2.37056	0.379586	3.16915	1.20342	15.4068	2.68539	0.35568	2.71779	0.398138	2.04881	25.2149		#N/A
Snca	1.47119	1.03445	0	0	0	0	0.0290635	#NUM!	#DIV/0!	#DIV/0!	2.50564		#N/A
Flt1	181.949	155.526	122.011	104.347	79.6265	91.6117	0.0291376	0.978776	0.122927	0.402602	735.071	FALSE	cell migration
Podxl	266.247	207.571	108.201	91.9091	33.6079	38.5136	0.0208172	-2.71583	0.0172172	-1.47229	746.05	FALSE	cell migration
Card6	3.74894	3.23949	6.78501	4.90174	7.39093	6.32979	0.0292362	0.973316	0.446064	0.231482	32.3959		#N/A
Fcrl6	0	0	0	0	0	0	#DIV/0!	#DIV/0!	#DIV/0!	#DIV/0!	0		#N/A
Ckap4	16.6634	17.0173	19.5259	20.2117	28.714	33.7315	0.0292432	0.890675	0.0463074	0.652093	135.864		#N/A
Abcc9	43.8591	19.381	31.4296	16.3403	4.46349	5.16282	0.160002	2.71578	0.127513	2.31105	120.636		#N/A
Fmnl3	53.2519	46.7901	29.6255	34.67	24.8248	29.5559	0.029412	0.879439	0.288092	0.241623	218.718	FALSE	cell migration
Pick1	3.23053	2.87556	5.46291	3.48653	4.19361	4.0643	0.0294682	0.435528	0.76031	0.116021	23.3134		#N/A
Sema3d	0.15104	0.0806859	0	0.0849822	0.702601	0.818177	0.0108388	2.71432	0.00983583	4.16151	1.83749	TRUE	neural crest cell migration
Apcs	0	0	0	0	0	0	#DIV/0!	#DIV/0!	#DIV/0!	#DIV/0!	0		#N/A
Olfr16	0	0	0	0	0	0	#DIV/0!	#DIV/0!	#DIV/0!	#DIV/0!	0		#N/A
Traf3ip2	3.70338	3.5414	4.89097	5.85017	7.85132	6.59621	0.0295106	0.995809	0.143545	0.427676	32.4335		#N/A
Olfr1408	0	0	0	0	0	0	#DIV/0!	#DIV/0!	#DIV/0!	#DIV/0!	0		#N/A
Olfr1406	0	0	0	0	0	0	#DIV/0!	#DIV/0!	#DIV/0!	#DIV/0!	0		#N/A
Olfr218	0	0	0	0	0	0	#DIV/0!	#DIV/0!	#DIV/0!	#DIV/0!	0		#N/A
Olfr418-ps1	0	0	0	0	0	0	#DIV/0!	#DIV/0!	#DIV/0!	#DIV/0!	0		#N/A
Olfr1404	0	0	0	0	0	0	#DIV/0!	#DIV/0!	#DIV/0!	#DIV/0!	0		#N/A
Fcer1a	0	0	0	0	0	0	#DIV/0!	#DIV/0!	#DIV/0!	#DIV/0!	0		#N/A
Mptx2	0	0	0	0	0	0	#DIV/0!	#DIV/0!	#DIV/0!	#DIV/0!	0		#N/A
BC094916	0	0	0	0	0	0	#DIV/0!	#DIV/0!	#DIV/0!	#DIV/0!	0		#N/A
Slc6a6	65.4751	66.0084	27.6815	25.7849	12.5015	7.6247	0.00193523	-2.70774	0.0237578	-1.40956	205.076		#N/A
Hspa1l	1.29511	0.230573	0.570616	0.24303	0	0.233635	0.357582	2.70713	0.286169	1.80014	2.57296		#N/A
Cyp1a1	1.18463	0.210883	0.173859	1.22256	0	0.213703	0.357596	2.70712	0.384278	2.70805	3.00564		#N/A
Dgkk	0	0.0366576	0	0	0.127666	0.11152	0.0369615	2.70595	0.00452587	#DIV/0!	0.275844		#N/A
Lypd8	0.37957	0.282095	0.505745	0	3.74375	0.570745	0.368869	2.70502	0.357616	3.09271	5.4819		#N/A
Map1a	0.813604	0.854309	1.25585	1.34947	1.05642	1.14007	0.0296063	0.397156	0.0827643	0.246261	6.46972		#N/A
Ctgf	14.4753	8.34973	18.177	22.8579	62.1858	86.2506	0.0369302	2.70116	0.048356	1.85492	212.296		#N/A
Afap1	9.62104	9.81552	10.1931	12.2634	11.9035	12.8143	0.029719	0.346777	0.422733	0.138417	66.6109		#N/A
Slc28a2	14.185	9.50582	6.8045	3.70112	2.40194	1.25693	0.0532523	2.69486	0.174323	1.52169	37.8553		#N/A
Klhl3	2.13441	2.23605	3.69186	6.93304	11.2643	16.9237	0.0521042	2.68922	0.114656	1.40763	43.1834		#N/A
Slc3a2	110.37	99.5632	80.8851	74.8754	70.7149	74.5224	0.0299633	0.531518	0.277204	0.100917	510.931		#N/A
Olfr433	0	0	0	0	0	0	#DIV/0!	#DIV/0!	#DIV/0!	#DIV/0!	0		#N/A
Olfr430	0	0	0	0	0	0	#DIV/0!	#DIV/0!	#DIV/0!	#DIV/0!	0		#N/A
Olfr432	0	0	0	0	0	0	#DIV/0!	#DIV/0!	#DIV/0!	#DIV/0!	0		#N/A
Olfr429	0	0	0	0	0	0	#DIV/0!	#DIV/0!	#DIV/0!	#DIV/0!	0		#N/A
Lmln	0	0.130465	0.214762	0.412337	0.113717	0.727445	0.374861	2.68872	0.771447	0.42369	1.59873		#N/A
Olfr427	0	0	0	0	0	0	#DIV/0!	#DIV/0!	#DIV/0!	#DIV/0!	0		#N/A
Olfr426	0	0	0	0	0	0	#DIV/0!	#DIV/0!	#DIV/0!	#DIV/0!	0		#N/A
Akap11	4.97122	4.28787	7.77381	6.75886	8.33075	9.73515	0.0300406	0.964327	0.178288	0.313969	41.8577		#N/A
Olfr231	0	0	0	0	0	0	#DIV/0!	#DIV/0!	#DIV/0!	#DIV/0!	0		#N/A
Olfr424	0	0	0	0	0	0	#DIV/0!	#DIV/0!	#DIV/0!	#DIV/0!	0		#N/A
Olfr421-ps1	0	0	0	0	0	0	#DIV/0!	#DIV/0!	#DIV/0!	#DIV/0!	0		#N/A
Olfr419	0	0	0	0	0	0	#DIV/0!	#DIV/0!	#DIV/0!	#DIV/0!	0		#N/A
Mptx1	0	0	0	0	0	0	#DIV/0!	#DIV/0!	#DIV/0!	#DIV/0!	0		#N/A
Olfr420	0	0	0	0	0	0	#DIV/0!	#DIV/0!	#DIV/0!	#DIV/0!	0		#N/A
Olfr248	0	0	0	0	0	0	#DIV/0!	#DIV/0!	#DIV/0!	#DIV/0!	0		#N/A
Zfp704	2.7977	2.72767	3.2531	3.16739	3.86869	4.33927	0.0300434	0.570953	0.0647327	0.35434	20.1538		#N/A
Olfr417	0	0	0	0	0	0	#DIV/0!	#DIV/0!	#DIV/0!	#DIV/0!	0		#N/A
Olfr220	0	0	0	0	0	0	#DIV/0!	#DIV/0!	#DIV/0!	#DIV/0!	0		#N/A
Olfr414	0	0	0	0	0	0	#DIV/0!	#DIV/0!	#DIV/0!	#DIV/0!	0		#N/A
Fmn2	0	0	0.134354	0.0430295	0	0	#DIV/0!	#DIV/0!	0.191581	#NUM!	0.177383		#N/A
Rgs7	0	0	0.381395	0	0	0	#DIV/0!	#DIV/0!	0.42265	#NUM!	0.381395		#N/A
Tubb6	51.0437	56.9461	59.4015	59.3543	73.8744	79.3014	0.0300744	0.504293	0.0239714	0.36719	379.921		#N/A
Fam53b	8.97537	8.84544	7.65874	7.68261	6.20793	7.01467	0.0301586	0.430557	0.119622	0.21442	46.3848		#N/A
Mapt	0.708755	0.986302	0.404964	0.471271	0	0.263091	0.064499	2.6877	0.152304	1.73576	2.83438	TRUE	neuron migration
Wdr64	0	0	0	0	0	0	#DIV/0!	#DIV/0!	#DIV/0!	#DIV/0!	0		#N/A
Susd3	0.338749	0	0	0	1.90683	0.274448	0.38424	2.68689	0.313211	#DIV/0!	2.52003		#N/A
Becn2	0	0	0	0	0	0	#DIV/0!	#DIV/0!	#DIV/0!	#DIV/0!	0		#N/A
Pld5	0	0	0	0	0	0	#DIV/0!	#DIV/0!	#DIV/0!	#DIV/0!	0		#N/A
Efna3	0.311839	0	0	0.26359	1.75401	0.252729	0.384176	2.68598	0.371209	2.92849	2.58217		#N/A
Dgkg	0.119998	0.0480762	0.395391	1.16472	0.251259	0.828696	0.257612	2.6838	0.667164	0.530677	2.80814		#N/A
2310043L19Rik	0	0	0	0	0	0	#DIV/0!	#DIV/0!	#DIV/0!	#DIV/0!	0		#N/A
Agt	0.389275	0.623674	1.28858	0.328816	0	0.157926	0.0941004	2.68124	0.272284	3.35635	2.78827		#N/A
Mir350	0	0	0	0	0	0	#DIV/0!	#DIV/0!	#DIV/0!	#DIV/0!	0		#N/A
1700016C15Rik	0	0	0	0	0	0	#DIV/0!	#DIV/0!	#DIV/0!	#DIV/0!	0		#N/A
Zcchc12	0.160296	0	0	0	0.897645	0.130105	0.383854	2.68068	0.312462	#DIV/0!	1.18805		#N/A
Zfp661	0.247952	0.39732	0.982575	0.209365	0	0.100656	0.0941811	2.68047	0.296585	3.56581	1.93787		#N/A
Kcnh4	0.177705	0.284768	0.117223	0.150011	0	0.0721688	0.0942219	2.67992	0.132977	1.88866	0.801876		#N/A
Gm20199	1.00633	1.61264	1.43804	1.84054	0	0.408708	0.0942284	2.67986	0.0377065	3.00393	6.30626		#N/A
Iqsec3	0.399687	0.120013	0.46046	0.294952	0	0.081128	0.271012	2.67941	0.0672726	3.21899	1.35624		#N/A
Gm16432	0	0	0.578129	0	0	0	#DIV/0!	#DIV/0!	0.42265	#NUM!	0.578129		#N/A
Ppp1r3c	0.772196	0.824886	1.36019	3.15139	3.96026	6.26955	0.0647224	2.67927	0.18954	1.18107	16.3385		#N/A
Ptafr	1.77235	1.26202	8.08381	9.48167	7.45172	11.9835	0.0693687	2.6792	0.73146	0.14593	40.0351		#N/A
Tpi1	35.5413	27.1917	53.455	37.7265	57.2054	54.5147	0.0306039	0.832592	0.326905	0.293076	265.635		#N/A
Dapk3	14.2003	15.2225	9.68244	15.9302	22.2502	20.1603	0.0306215	0.527487	0.125506	0.727566	97.4459		#N/A
Stim1	22.3604	19.3402	21.1101	23.2992	29.152	29.4831	0.0307143	0.491696	0.0233756	0.400903	144.745		#N/A
Dip2a	7.18711	7.37486	7.28979	5.84755	4.69037	5.46163	0.030905	0.520442	0.209498	0.371909	37.8513		#N/A
Lrrc8e	0.0865784	0	0	0.073085	0.483796	0.0703233	0.383696	2.67812	0.370536	2.92255	0.713783		#N/A
Rgs17	0.0401224	0	0.370344	0	0.22413	0.0326029	0.383636	2.67779	0.810801	0.528598	0.667199		#N/A
Spock3	0.110344	0	0	0	0.616366	0.0894753	0.383886	2.67734	0.312295	#DIV/0!	0.816185		#N/A
Psca	2.44343	1.95621	0	0	0.690744	0	0.0482163	2.67116	0.42265	#DIV/0!	5.09038		#N/A
Sptbn1	301.869	268.493	236.613	219.828	158.896	183.15	0.0311373	0.737688	0.0605101	0.416238	1368.85		#N/A
Rbmx	9.01354	8.38241	10.5589	6.17038	6.97794	6.89908	0.0311512	0.326054	0.582469	0.269678	48.0023		#N/A
Gpr174	0	0.105166	0	0.0564777	0.560775	0.108749	0.34802	2.67047	0.310644	3.56738	0.831168		#N/A
Lhx6	8.09388	11.2392	17.7897	23.5302	18.8336	18.2007	0.0313169	0.937791	0.535364	0.157975	97.6873	FALSE	cerebral cortex GABAergic interneuron migration
Il7r	0.634959	0.0847895	1.39697	0	3.55011	1.03129	0.272894	2.67022	0.384098	1.71349	6.69812		#N/A
Ms4a4b	0.906191	0	0.802866	0	5.52024	0.24483	0.459828	2.66945	0.450582	2.84411	7.47413		#N/A
9230114K14Rik	0.332492	0.266364	0.219908	0.421207	3.25894	0.539708	0.3605	2.6652	0.366456	2.56683	5.03862		#N/A
Mir6904	0	0	0	0	0	0	#DIV/0!	#DIV/0!	#DIV/0!	#DIV/0!	0		#N/A
Cuedc1	13.534	14.7242	9.03215	12.9567	9.88781	10.6319	0.0313614	0.461659	0.748303	0.0997618	70.7668		#N/A
Fam124b	0.598444	1.24662	0.158071	0.505275	0	0.291556	0.160408	2.66183	0.498377	1.18599	2.79997		#N/A
Gm5069	0.847762	0.60378	0.870063	0	0	0.229514	0.0676051	2.66093	0.550387	1.92254	2.55112		#N/A
Trp53bp2	5.49722	4.46588	9.06171	3.60904	8.21043	7.81474	0.0316375	0.685673	0.601983	0.338838	38.659		#N/A
Med22	6.92431	6.98008	4.42227	5.18649	4.90591	5.53479	0.0316554	0.413322	0.489056	0.119796	33.9539		#N/A
B3galnt1	4.16424	1.35916	2.85504	2.47468	0	0.876333	0.254612	2.65601	0.0430659	2.60451	11.7295		#N/A
Morn3	0	0.352785	0	0.745437	1.86573	0.356635	0.351019	2.65523	0.472775	1.57594	3.32059		#N/A
Myrip	2.16324	1.78926	7.72827	8.95289	11.4976	13.3788	0.00829824	2.65394	0.0675128	0.576558	45.5101		#N/A
Cldn11	0	0.458497	0	0.483448	1.33665	1.54805	0.0406802	2.65344	0.0450474	2.57699	3.82665		#N/A
9130409I23Rik	0	0	0	0	0	0	#DIV/0!	#DIV/0!	#DIV/0!	#DIV/0!	0		#N/A
B230217O12Rik	2.00021	1.45668	1.20331	0.460753	0.254729	0.295117	0.0333997	2.65238	0.272782	1.59761	5.6708		#N/A
Fam124a	1.32818	0.912154	5.13269	6.08673	5.30259	8.70688	0.0754352	2.64462	0.512711	0.320404	27.4692		#N/A
Zfp819	0	0.115443	0	0.12168	0.604914	0.116976	0.350044	2.6446	0.355034	2.56869	0.959013		#N/A
Cnih3	0	0	0	0	0	0	#DIV/0!	#DIV/0!	#DIV/0!	#DIV/0!	0		#N/A
Ccdc121	0	0	0	0	0	0	#DIV/0!	#DIV/0!	#DIV/0!	#DIV/0!	0		#N/A
Sh3bp5	59.173	49.6537	73.7562	71.8715	95.9378	86.3997	0.0320001	0.744579	0.0635329	0.324327	436.792		#N/A
Vmn1r1	0	0	0	0	0	0	#DIV/0!	#DIV/0!	#DIV/0!	#DIV/0!	0		#N/A
Zbed5	0	0.111454	0	0	0.583921	0.112938	0.350028	2.64442	0.277104	#DIV/0!	0.808313		#N/A
Rnf181	12.6901	11.0292	10.3944	15.0592	18.202	20.3588	0.0320344	0.701074	0.125454	0.599265	87.7337		#N/A
Alkbh6	6.01839	6.53993	4.5906	5.45438	12.7383	10.7878	0.0322572	0.905619	0.024136	1.22779	46.1294		#N/A
1700047M11Rik	0	0	0	0	0	0	#DIV/0!	#DIV/0!	#DIV/0!	#DIV/0!	0		#N/A
Nedd9	24.9079	25.155	29.3965	30.0471	30.6349	28.9056	0.0323334	0.250129	0.962941	0.00234985	169.047	FALSE	cell migration
Cystm1	12.2372	3.26389	7.72533	4.1503	1.16427	1.31594	0.283907	2.64384	0.119581	2.25947	29.8569		#N/A
Pla2g4f	0	0.0872574	0	0	0.456723	0.0884405	0.349928	2.64334	0.27694	#DIV/0!	0.632421		#N/A
Capn8	0	0	0	0	0	0	#DIV/0!	#DIV/0!	#DIV/0!	#DIV/0!	0		#N/A
4922505E12Rik	0	0	0	0	0	0	#DIV/0!	#DIV/0!	#DIV/0!	#DIV/0!	0		#N/A
Aass	0	0	0.600073	0	0.254179	0.369404	0.0324885	#DIV/0!	0.972804	0.0554436	1.22366		#N/A
Nin	18.5219	20.5623	16.3478	16.6186	12.6149	13.7744	0.0325173	0.566632	0.0312466	0.321043	98.4399		#N/A
Fam166b	1.39136	0.955884	0.369513	0.25219	0	0	0.0327391	#NUM!	0.0338163	#NUM!	2.96895		#N/A
Zfp949	1.25579	1.23837	1.65725	0.768009	1.48489	1.41219	0.0327438	0.216046	0.649751	0.256461	7.8165		#N/A
4930488B22Rik	0	0	0	0	0	0	#DIV/0!	#DIV/0!	#DIV/0!	#DIV/0!	0		#N/A
Exo5	2.16334	0.577594	0	1.21808	0	0.438784	0.296677	2.64308	0.608379	1.47303	4.3978		#N/A
1700112H15Rik	0	0	0	0	0	0	#DIV/0!	#DIV/0!	#DIV/0!	#DIV/0!	0		#N/A
Tmem151a	0	0.0681277	0	0	0.35633	0.0690644	0.349849	2.64249	0.276811	#DIV/0!	0.493522		#N/A
Kl	0.129451	0	0	0.163892	0.542179	0.262922	0.15936	2.63676	0.186214	2.29642	1.09844		#N/A
Hist2h2ac	1.20728	4.83001	4.96286	3.08042	0	0.9709	0.309284	2.63651	0.0791844	3.05039	15.0515		#N/A
Mir1981	0	0	0	0	0	0	#DIV/0!	#DIV/0!	#DIV/0!	#DIV/0!	0		#N/A
Cep112	1.74463	1.55316	1.9186	1.30917	1.08353	0.944616	0.0330045	0.701338	0.194956	0.670376	8.55371		#N/A
Exoc3l	13.8752	13.7841	4.21744	7.26413	10.6771	9.23674	0.0330106	0.473993	0.12943	0.794452	59.0547		#N/A
Pkn3	26.4816	22.8058	21.1054	29.647	40.4522	46.4167	0.033042	0.817621	0.0740789	0.775364	186.909	FALSE	epithelial cell migration
Tbx3	13.6124	12.193	8.62285	8.68869	1.45677	2.71648	0.00760875	2.62843	0.00909271	2.05249	47.2902		#N/A
5033404E19Rik	0	0	0	0	0	0	#DIV/0!	#DIV/0!	#DIV/0!	#DIV/0!	0		#N/A
Wfdc17	2.40551	0.962381	1.64786	0	20.8222	0	0.49101	2.62821	0.455532	3.65946	25.838		#N/A
Me1	2.08389	1.58619	3.85102	4.4863	14.5636	8.12342	0.098603	2.62798	0.156881	1.44421	34.6944		#N/A
Tmem184a	1.56197	1.32985	1.27287	0.732298	0	0.468043	0.0434549	2.62726	0.164571	2.09901	5.36503		#N/A
G6bos	0.333071	1.3337	0	0.844717	0	0.269879	0.310082	2.62667	0.58332	1.64616	2.78137		#N/A
D1Pas1	0	0	0	0	0	0	#DIV/0!	#DIV/0!	#DIV/0!	#DIV/0!	0		#N/A
2810408A11Rik	0.216504	0.867139	0	0	0	0.17563	0.310215	2.62528	0.42265	#DIV/0!	1.25927		#N/A
Pmvk	3.22924	3.36205	5.15356	3.00275	4.99659	4.47394	0.0333344	0.522884	0.612886	0.215529	24.2181		#N/A
Hoxb6	1.42376	0	0	0	0	0.230837	0.495168	2.62476	0.42265	#DIV/0!	1.6546		#N/A
Dpysl4	0.130656	0.52339	0	0	0	0.106079	0.310312	2.62425	0.42265	#DIV/0!	0.760125		#N/A
Spata17	0	0	0	0	0	0	#DIV/0!	#DIV/0!	#DIV/0!	#DIV/0!	0		#N/A
1700007P06Rik	0	0	0	0	0	0	#DIV/0!	#DIV/0!	#DIV/0!	#DIV/0!	0		#N/A
Chit1	0.231297	0.158189	0	0.390844	0	0	0.0334737	#NUM!	0.42265	#NUM!	0.78033		#N/A
Cmya5	0.382355	0.634676	0.323603	0.0460931	0.0761757	0.0887857	0.0777908	2.62416	0.537855	1.16421	1.55169		#N/A
Grb7	0.725414	0	0.38355	0.612569	0	0.117775	0.495282	2.62277	0.0762609	3.08028	1.83931		#N/A
Snora36b	0	0	0	0	0	0	#DIV/0!	#DIV/0!	#DIV/0!	#DIV/0!	0		#N/A
Mir664	0	0	0	0	0	0	#DIV/0!	#DIV/0!	#DIV/0!	#DIV/0!	0		#N/A
Mir194-1	0	0	0	0	0	0	#DIV/0!	#DIV/0!	#DIV/0!	#DIV/0!	0		#N/A
Mir215	0	0	0	0	0	0	#DIV/0!	#DIV/0!	#DIV/0!	#DIV/0!	0		#N/A
Acap3	8.05258	6.70035	4.90135	3.92146	3.6767	3.83672	0.033604	0.97346	0.317997	0.231768	31.0892	FALSE	neuron migration
Tyw1	3.91777	3.90425	2.51249	3.02416	4.03484	4.09038	0.0337538	0.0548657	0.0373322	0.553394	21.4839		#N/A
9330162B11Rik	0	0	0.209551	0	0	0	#DIV/0!	#DIV/0!	0.42265	#NUM!	0.209551		#N/A
Fam129c	0.698331	0	0	0.235872	0	0.113384	0.495286	2.62269	0.685811	1.05679	1.04759		#N/A
2200002D01Rik	27.3694	18.5285	88.9928	85.835	122.512	160.157	0.0256512	2.62261	0.103932	0.693179	503.395		#N/A
Foxa1	0.533214	0	0	0	0	0.0866034	0.495314	2.62222	0.42265	#DIV/0!	0.619817		#N/A
Spata45	0	0	0	0	0	0	#DIV/0!	#DIV/0!	#DIV/0!	#DIV/0!	0		#N/A
Acvr1c	0.188082	0	0	0	0	0.0305629	0.495354	2.62151	0.42265	#DIV/0!	0.218645		#N/A
Rnf220	14.6812	12.4264	9.69417	13.7949	7.11871	7.69098	0.0339692	0.872156	0.171015	0.665448	65.4064		#N/A
Golim4	13.0551	10.0255	13.4109	16.7992	23.0864	20.6258	0.0339734	0.921355	0.0842128	0.533005	97.0029		#N/A
Dhh	0.588385	1.88553	4.47235	3.22961	8.02828	7.16445	0.0146841	2.61851	0.0384813	0.980084	25.3686		#N/A
Camk2a	0.0787877	0.12637	0.10322	0.399561	0.550906	0.704998	0.0227559	2.61392	0.152841	1.32072	1.96384		#N/A
Zfp629	2.36705	2.71574	2.552	1.72533	1.27639	1.52986	0.0340365	0.856977	0.230985	0.608067	12.1664		#N/A
Dnajc18	2.49936	2.87564	5.65996	3.40773	3.66824	3.69665	0.0341307	0.454399	0.528566	0.300071	21.8076		#N/A
Rptn	2.42071	0.323266	0	0.0681122	0.450817	0	0.397029	2.60565	0.489597	2.72656	3.26291		#N/A
Oprd1	0	0.0667709	0	0	0	0.40614	0.496325	2.60469	0.42265	#DIV/0!	0.472911		#N/A
Il31ra	0	0.0735979	0	0.542795	0	0.447635	0.496331	2.60459	0.904795	0.278085	1.06403		#N/A
Mbtps1	13.3408	12.423	18.3616	16.1591	15.3573	15.2637	0.0342342	0.249176	0.218922	0.17294	90.9055		#N/A
Foxc1	6.97335	4.98151	18.8401	21.2763	31.9222	40.6051	0.0209524	2.60093	0.0694519	0.854332	124.599	TRUE	cell migration
Gpr31b	0	0.337371	0	0.71276	0	2.04663	0.496549	2.60084	0.600943	1.52176	3.09676		#N/A
Tbc1d5	4.81896	4.64108	3.95008	4.46406	4.26565	4.20176	0.034396	0.159926	0.927465	0.00910492	26.3416		#N/A
D17Wsu104e	31.902	30.2196	22.8067	20.526	43.7719	40.0025	0.034474	0.431414	0.0116605	0.951053	189.229		#N/A
Ccl12	0.960879	1.53754	5.22502	2.44668	15.1476	0	0.491819	2.6	0.675337	0.981471	25.3177	TRUE	eosinophil chemotaxis
Rtp3	10.6007	9.17221	5.04379	5.49022	1.77991	1.49166	0.00770911	2.59547	0.00531141	1.687	33.5785		#N/A
A630089N07Rik	0.825618	0.793701	0.873662	0.557815	0	0.268035	0.037663	2.59489	0.10684	2.41701	3.31883		#N/A
Usp10	5.66561	4.20311	5.2628	7.61758	9.38549	8.77608	0.0346176	0.879954	0.162072	0.495714	40.9107		#N/A
Atxn1	8.21158	7.43675	6.45492	7.8361	4.74358	5.44327	0.0346525	0.619301	0.117712	0.488401	40.1262		#N/A
1700065J18Rik	0	0	0	0	0	0	#DIV/0!	#DIV/0!	#DIV/0!	#DIV/0!	0		#N/A
Pdcd7	6.07772	5.88833	3.17572	4.5354	2.76875	3.78652	0.0347121	0.86822	0.566375	0.234285	26.2324		#N/A
Mir3473c	0	0	0	0	0	0	#DIV/0!	#DIV/0!	#DIV/0!	#DIV/0!	0		#N/A
Ephx3	8.19865	2.99609	3.61226	4.37256	0.805086	1.05088	0.214832	2.59258	0.016576	2.10509	21.0355		#N/A
Fam114a2	10.0037	7.90932	9.51877	10.7007	14.3627	14.5124	0.0347861	0.688817	0.0184232	0.514081	67.0076		#N/A
Serpina3f	5.43338	5.1294	18.2659	18.7435	35.1118	28.5785	0.0148193	2.59208	0.0553256	0.783182	111.262		#N/A
Syt14	0	0	0	0	0	0	#DIV/0!	#DIV/0!	#DIV/0!	#DIV/0!	0		#N/A
Fxyd5	80.9903	75.6078	88.8972	74.6244	92.2444	92.4487	0.0348467	0.238063	0.276264	0.175649	504.813		#N/A
Plb1	0.557996	0.0548196	0	0	3.23147	0.460925	0.388255	2.59103	0.314169	#DIV/0!	4.30521		#N/A
Tfcp2l1	0.21047	0.0843275	0	0.0592047	0.048931	0	0.210825	2.5909	0.905839	0.274963	0.402933		#N/A
Gcnt4	0.130059	0.0521068	0.342895	0.603765	0.726313	0.369821	0.129224	2.5891	0.767304	0.211506	2.22496		#N/A
Comp	0	0	0.189259	0.241825	2.40434	1.62735	0.0351923	#DIV/0!	0.0437343	3.22534	4.46277		#N/A
Itga2b	0.098393	0.236505	0.389555	0.830641	1.37501	0.639283	0.154052	2.58848	0.45232	0.723161	3.56939		#N/A
Col12a1	0.276171	0.110653	0.618104	0.256353	0.731783	1.5936	0.157806	2.58772	0.260767	1.41101	3.58666		#N/A
Pml	11.9425	14.4015	15.7797	17.9647	19.891	19.3896	0.0356336	0.576343	0.132218	0.219169	99.369	FALSE	fibroblast migration
Mir205	0	0	0	0	0	0	#DIV/0!	#DIV/0!	#DIV/0!	#DIV/0!	0		#N/A
4930503O07Rik	0	0	0	0	0	0	#DIV/0!	#DIV/0!	#DIV/0!	#DIV/0!	0		#N/A
Bsg	163.407	133.048	155.746	158.429	229.241	246.05	0.0356511	0.680998	0.0109783	0.597243	1085.92		#N/A
Fnip1	2.40744	2.05488	3.24113	2.91523	3.65199	3.31687	0.0356573	0.643129	0.22432	0.178845	17.5875		#N/A
Clec2i	0.448763	0	0.205802	0	2.31605	0.379024	0.375852	2.5863	0.329554	3.711	3.34964		#N/A
2810002D19Rik	2.24158	1.39648	1.98238	1.2627	0	0.605935	0.100243	2.58593	0.107055	2.42102	7.48907		#N/A
Kctd1	1.01944	0.89028	1.33863	1.40387	1.42211	1.32338	0.035817	0.523703	0.982137	0.00157204	7.39771		#N/A
Fam150b	0.488562	1.56534	0	0.412804	0.342826	0	0.269181	2.58282	0.908175	0.26798	2.80953		#N/A
Mir29b-2	0	0	0	0	0	0	#DIV/0!	#DIV/0!	#DIV/0!	#DIV/0!	0		#N/A
Mir29c	0	0	0	0	0	0	#DIV/0!	#DIV/0!	#DIV/0!	#DIV/0!	0		#N/A
Ston2	0.229687	0.0788805	0.561685	0.304587	0.778042	1.06664	0.0421168	2.57971	0.126998	1.09048	3.01952		#N/A
Csrp2	22.3247	10.0541	42.8893	53.9085	105.112	88.4461	0.0160904	2.57965	0.0400889	0.999721	322.735		#N/A
Luc7l3	10.0824	8.98494	10.8637	8.68559	6.47068	6.76773	0.0360036	0.526374	0.102938	0.562386	51.855		#N/A
Slc29a2	1.4022	0.449354	0	0	0.196192	0.113834	0.248322	2.57828	0.0638815	#DIV/0!	2.16158		#N/A
Gstk1	6.58175	7.37784	9.96001	6.68109	9.28953	9.94462	0.0361463	0.462414	0.519185	0.208919	49.8348		#N/A
Ints9	7.84749	7.52404	5.26846	2.93286	5.21822	4.07348	0.0362147	0.726246	0.715799	0.180086	32.8646		#N/A
1810006J02Rik	0.214605	0.51572	0.568696	0.906478	3.3101	1.04455	0.253668	2.57595	0.335633	1.56167	6.56015		#N/A
Myo1d	18.84	17.175	11.9685	17.0484	11.4687	12.998	0.0362526	0.557778	0.481432	0.246074	89.4986		#N/A
Oprm1	0	0	0	0	0	0	#DIV/0!	#DIV/0!	#DIV/0!	#DIV/0!	0		#N/A
Tmem255b	76.6328	66.2038	69.9354	57.7391	43.278	45.331	0.0363386	0.688841	0.0873051	0.526945	359.12		#N/A
Adarb1	16.1883	16.0608	6.81764	6.41346	2.9345	2.47416	0.000316571	2.57592	0.00607703	1.29059	50.8889		#N/A
Psme2b	10.8122	11.8287	9.25113	11.1192	8.77968	8.53037	0.0364524	0.387321	0.245902	0.234859	60.3213		#N/A
Rnf165	0.268912	0.251396	1.35793	0.718662	1.31325	1.78453	0.0318862	2.5738	0.327286	0.577017	5.69468		#N/A
Cmip	64.6589	64.6579	72.557	75.44	85.7992	96.1482	0.0365581	0.492612	0.0872284	0.297954	459.261		#N/A
Abl2	7.64162	8.76205	11.7932	14.6087	12.6605	14.4414	0.036571	0.724375	0.853037	0.0377522	69.9075	FALSE	substrate-dependent cell migration"
Zdhhc18	25.7588	26.1347	19.8716	17.3786	23.0596	23.9455	0.0366388	0.142737	0.0663257	0.335569	136.149		#N/A
Tbc1d22b	3.77426	3.79943	1.78795	4.4934	4.46275	4.7945	0.0369049	0.289587	0.388908	0.559509	23.1123		#N/A
Lama3	11.0731	14.1017	3.09776	4.39422	2.6251	1.60607	0.0224961	2.57285	0.186609	0.82429	36.898	TRUE	cell migration
Magi2	0.10046	0	0	0.123275	0.280524	0.316502	0.0432078	2.57117	0.0662576	2.27591	0.820761		#N/A
Lsmem1	1.26221	1.76904	3.35644	0.53347	0	0.511458	0.0728464	2.56723	0.360108	2.92705	7.43262		#N/A
Enpp2	81.4511	42.801	277.705	229.304	421.709	314.227	0.0331445	2.56631	0.191619	0.537569	1367.2	TRUE	cell chemotaxis
Iyd	0	0	0	0	0	0	#DIV/0!	#DIV/0!	#DIV/0!	#DIV/0!	0		#N/A
Ppp1r14c	0	0	0	0	0	0	#DIV/0!	#DIV/0!	#DIV/0!	#DIV/0!	0		#N/A
H60c	0	0	0	0	0	0	#DIV/0!	#DIV/0!	#DIV/0!	#DIV/0!	0		#N/A
B020014A21Rik	0	0	0	0	0	0	#DIV/0!	#DIV/0!	#DIV/0!	#DIV/0!	0		#N/A
Ldlr	3.52678	3.65263	5.83029	5.6437	5.03215	5.73	0.0370124	0.584029	0.428299	0.0924008	29.4155		#N/A
Etnk2	0	0.737071	0	0	0	0.124467	0.498609	2.56604	0.42265	#DIV/0!	0.861538		#N/A
Foxp1	15.5616	13.3179	21.2198	18.4584	27.859	23.9073	0.0372353	0.841967	0.128987	0.383667	120.324		#N/A
Tmem200b	9.00952	10.4962	13.4113	15.2276	17.2563	20.5855	0.0373394	0.956083	0.136015	0.402005	85.9864		#N/A
LOC100504703	2.46564	0	0	0	14.5987	0	0.498623	2.56581	0.42265	#DIV/0!	17.0643		#N/A
Hpx	0.997822	0.19981	0.33092	0	0	0.202294	0.350186	2.56566	0.771692	0.710029	1.73085		#N/A
Carhsp1	29.1071	25.0549	24.1455	16.2484	16.8191	14.9424	0.0375205	0.770002	0.398976	0.346858	126.317		#N/A
Cnnm4	2.54282	3.0271	1.62854	1.83972	1.5218	1.59353	0.0375531	0.838272	0.254372	0.154827	12.1535		#N/A
6720416L17Rik	0.565621	0.113288	0	0.597029	0	0.114794	0.350256	2.56417	0.510816	2.37875	1.39073		#N/A
Efcc1	0.12481	0.399981	0.164863	0.737672	0.872756	2.22944	0.203671	2.56347	0.273842	1.78124	4.52952		#N/A
Cacna1b	0.134625	0.0266398	0	0	0	0.0273282	0.352247	2.56097	0.42265	#DIV/0!	0.188593		#N/A
Siglec1	0.411506	0.206087	0.881083	0.0868249	3.51749	0.125386	0.467273	2.56035	0.522858	1.91214	5.22838		#N/A
Yipf2	7.4951	7.53917	9.28747	8.30078	8.84589	9.50737	0.0376582	0.287782	0.58557	0.0614244	50.9758		#N/A
Mir5104	0	0	0	0	0	0	#DIV/0!	#DIV/0!	#DIV/0!	#DIV/0!	0		#N/A
Gm6150	0	0	0	0	0	0	#DIV/0!	#DIV/0!	#DIV/0!	#DIV/0!	0		#N/A
Fam101b	110.523	94.9507	58.1364	42.7943	20.6998	14.1403	0.00966454	-2.56013	0.0582271	-1.53454	341.245		#N/A
Smtn	40.9532	47.665	27.7519	30.9783	20.4411	25.6533	0.0376926	0.943012	0.17541	0.349511	193.443		#N/A
Gm5177	0	0	0	0	0	0	#DIV/0!	#DIV/0!	#DIV/0!	#DIV/0!	0		#N/A
Ptch1	5.50682	6.09033	5.31888	4.9102	4.33293	4.3473	0.0377866	0.417965	0.0631745	0.236871	30.5065		#N/A
Pias4	10.9069	11.3578	6.64848	11.6099	6.72989	8.13982	0.0378111	0.582382	0.578682	0.296182	55.3928		#N/A
Rps12	520.132	407.198	493.926	439.934	807.808	750.919	0.0378478	0.749214	0.0153917	0.73909	3419.92		#N/A
Grm1	0	0	0	0	0	0	#DIV/0!	#DIV/0!	#DIV/0!	#DIV/0!	0		#N/A
4930567K20Rik	0	0	0	0	0	0	#DIV/0!	#DIV/0!	#DIV/0!	#DIV/0!	0		#N/A
Snx22	7.57831	7.04725	6.07988	8.57018	11.5484	10.2176	0.0379874	0.573584	0.127924	0.57117	51.0416		#N/A
Clca5	0.684612	1.02851	0.338664	0.939104	0	0	0.0380149	#NUM!	0.16714	#NUM!	2.99089		#N/A
Tfpi2	4.88187	2.93275	25.8998	11.3434	25.6921	20.1916	0.0227009	2.55373	0.634528	0.301005	90.9415		#N/A
B230208H11Rik	0	0	0	0	0	0	#DIV/0!	#DIV/0!	#DIV/0!	#DIV/0!	0		#N/A
Pcf11	19.1966	17.1569	24.3252	16.873	12.1288	13.059	0.0380262	0.529369	0.166683	0.709856	102.739		#N/A
Zc2hc1b	0	0	0	0	0	0	#DIV/0!	#DIV/0!	#DIV/0!	#DIV/0!	0		#N/A
Bok	11.924	8.92784	13.4154	9.63781	21.8367	19.1273	0.0380531	0.974182	0.0612433	0.829389	84.8691		#N/A
Wbscr17	0.717114	0.19153	0.105088	0.269034	1.89191	3.43037	0.113119	2.55026	0.0854251	3.83046	6.60505		#N/A
Vgll4	30.9884	31.8433	39.2269	33.6032	37.3876	35.5461	0.0380982	0.215093	0.987621	0.00205076	208.595		#N/A
Vwa8	3.64113	3.94168	4.29959	4.67371	4.75205	5.09362	0.0381285	0.376757	0.227204	0.133851	26.4018		#N/A
Glmn	0.196563	0.47238	2.5774	0.830181	3.47229	0.431085	0.400533	2.54477	0.900541	0.195974	7.9799		#N/A
Mettl18	0.508079	0	0	0.643979	2.13973	0.824009	0.223794	2.54429	0.254129	2.20233	4.1158		#N/A
Erich3	0.176293	0	0	0.297792	0.740764	0.286133	0.223205	2.54224	0.311777	1.78591	1.50098		#N/A
Sost	0.341784	0	0.904361	1.01031	1.43592	0.554765	0.223164	2.54211	0.939547	0.0561684	4.24714		#N/A
Nxph3	0.168448	0	0.222838	0.569055	0.707639	0.273422	0.223145	2.54204	0.765835	0.309037	1.9414		#N/A
Nmbr	0	0	0	0	0	0	#DIV/0!	#DIV/0!	#DIV/0!	#DIV/0!	0		#N/A
Tmem140	0.924085	0.951878	1.22094	1.00321	0.738652	0.643072	0.0382492	0.441162	0.0712608	0.686785	5.48184		#N/A
Gm20125	0	0	0	0	0	0	#DIV/0!	#DIV/0!	#DIV/0!	#DIV/0!	0		#N/A
1700016L04Rik	0	0	0	0	0	0	#DIV/0!	#DIV/0!	#DIV/0!	#DIV/0!	0		#N/A
Gje1	0	0	0	0	0	0	#DIV/0!	#DIV/0!	#DIV/0!	#DIV/0!	0		#N/A
Ralgds	36.2584	35.2639	51.0443	53.1747	63.2416	77.0727	0.0383129	0.972197	0.123153	0.429044	316.056		#N/A
BC035044	0.132122	0	0	0	0.554451	0.214535	0.222871	2.54109	0.15205	#DIV/0!	0.901108		#N/A
4931431C16Rik	0.125698	0	0	0.212264	0.527394	0.204117	0.222822	2.54092	0.311482	1.78502	1.06947		#N/A
Col9a2	0.125153	0	0	0.317017	0.525102	0.203234	0.222817	2.54091	0.458688	1.20004	1.17051		#N/A
Mst1r	0.211846	0.319116	0	0.168857	0	0	0.0384757	#NUM!	0.42265	#NUM!	0.699819		#N/A
Nebl	1.26059	1.83633	1.51323	2.1286	0.160223	0.372228	0.0527495	2.54011	0.0411318	2.77394	7.2712		#N/A
Ect2l	0	0	0	0	0	0	#DIV/0!	#DIV/0!	#DIV/0!	#DIV/0!	0		#N/A
Cep135	2.24071	2.19443	1.14857	2.04882	2.51981	2.42727	0.038504	0.157598	0.19288	0.629683	12.5796		#N/A
Ssfa2	20.2976	16.7853	21.0967	25.094	27.4295	29.2807	0.0385671	0.612854	0.139567	0.296006	139.984		#N/A
A330074K22Rik	0	0.111552	0.184013	0.587871	0.194812	0.452149	0.19648	2.53596	0.8186	0.254705	1.5304		#N/A
Itih2	0	0.0873471	0	0.368163	0.152398	0.354125	0.196791	2.5358	0.773034	0.460283	0.962033		#N/A
Gm4922	0	0	0	0	0	0	#DIV/0!	#DIV/0!	#DIV/0!	#DIV/0!	0		#N/A
4930444F02Rik	0	0	0	0	0	0	#DIV/0!	#DIV/0!	#DIV/0!	#DIV/0!	0		#N/A
Kctd11	6.4437	5.36501	7.34372	4.48059	3.18077	3.28272	0.0387183	0.869466	0.202222	0.871371	30.0965		#N/A
Slc27a3	13.5855	15.5837	17.147	14.341	9.7242	9.02245	0.0388964	0.637813	0.0478641	0.748169	79.4039		#N/A
Gm20139	0	0	0	0	0	0	#DIV/0!	#DIV/0!	#DIV/0!	#DIV/0!	0		#N/A
Rps17	485.248	429.826	606.175	510.996	653.681	609.666	0.0389019	0.465291	0.29801	0.177401	3295.59		#N/A
Ptprn2	0	0.0568371	0	0	0.0990492	0.2305	0.197181	2.53559	0.129021	#DIV/0!	0.386386		#N/A
Il20ra	0	0	0	0	0	0	#DIV/0!	#DIV/0!	#DIV/0!	#DIV/0!	0		#N/A
Pif1	0.732096	0.439935	0.241484	0.231756	0.12786	0.0743269	0.0823722	2.53525	0.0380118	1.22688	1.84746		#N/A
Cfh	6.87979	1.65375	12.1976	4.06505	31.0664	18.2563	0.0983648	2.53104	0.161204	1.60069	74.1189		#N/A
Prkag2	3.87268	2.07827	5.60785	8.18193	18.3794	16.0072	0.0107653	2.53065	0.0276895	1.31825	54.1273		#N/A
Mlxip	8.37639	6.31255	7.68812	11.6162	12.8676	12.3058	0.0391899	0.77717	0.277221	0.382976	59.1667		#N/A
Mir6413	0	0	0	0	0	0	#DIV/0!	#DIV/0!	#DIV/0!	#DIV/0!	0		#N/A
Ptgs2	2.17919	0.582027	2.98065	1.8395	8.79317	7.0806	0.030445	2.52327	0.0329582	1.71949	23.4551		#N/A
Fgf13	0.13845	0.111162	0.931027	0.297129	0.983113	0.450572	0.156537	2.52197	0.827103	0.223234	2.91145	TRUE	cerebral cortex cell migration
2310033P09Rik	13.816	14.0158	6.12138	10.6399	9.06499	10.7	0.0392554	0.493787	0.595725	0.237815	64.3581		#N/A
4930405J17Rik	0	0	0	0	0	0	#DIV/0!	#DIV/0!	#DIV/0!	#DIV/0!	0		#N/A
Fkbp1a	131.117	95.2704	129.739	121.062	212.155	199.78	0.0393244	0.863623	0.0086835	0.715874	889.123		#N/A
Cnot3	11.3071	10.9465	15.2433	12.7289	12.5164	13.1026	0.039368	0.203175	0.458271	0.12678	75.8448		#N/A
Piezo2	3.35547	4.60254	2.1095	1.96424	0.969711	0.417649	0.040483	2.52007	0.0423106	1.55401	13.4191		#N/A
1700020N01Rik	0	0	0	0	0	0	#DIV/0!	#DIV/0!	#DIV/0!	#DIV/0!	0		#N/A
Slc16a13	11.4996	20.6197	5.78907	7.0515	3.06444	2.55626	0.10112	2.51462	0.0337406	1.19189	50.5806		#N/A
Aldh8a1	0	0	0.412693	0	0	0	#DIV/0!	#DIV/0!	0.42265	#NUM!	0.412693		#N/A
Gm5420	0	0	0	0	0	0	#DIV/0!	#DIV/0!	#DIV/0!	#DIV/0!	0		#N/A
Ccr1	0.242204	0	0.159945	0	1.18543	0.196663	0.379246	2.51256	0.346747	3.11121	1.78424	TRUE	cell chemotaxis
Lgals4	3.60844	2.06438	2.39094	1.5176	0	0.995633	0.125826	2.51038	0.158872	1.97294	10.577		#N/A
Fignl2	6.19635	7.25633	3.56224	5.56571	3.6615	4.12992	0.0394403	0.787935	0.582598	0.228405	30.3721		#N/A
2900076A07Rik	1.47058	0.784895	1.31138	0.414786	0	0.396576	0.143499	2.50776	0.307854	2.1219	4.37822		#N/A
Fam134b	0.933965	0.607888	0.985919	0.796891	7.36749	1.39494	0.350766	2.50667	0.363194	2.29718	12.0871		#N/A
Dph6	2.2943	1.63391	3.36762	3.12105	3.56547	3.82907	0.0395967	0.912588	0.128796	0.188538	17.8114		#N/A
Adipoq	0.92914	0.496091	0	0	0	0.251011	0.143582	2.50537	0.42265	#DIV/0!	1.67624		#N/A
Lamc1	83.8593	90.0433	76.6343	71.0609	54.7327	64.1726	0.0396191	0.548466	0.119541	0.31281	440.503	FALSE	cell migration
Gm6682	0.838486	0.447715	0.371152	0.944821	0	0.226588	0.143597	2.50497	0.219402	2.53799	2.82876		#N/A
2310010J17Rik	1.18501	0	0	4.63143	5.27822	1.44796	0.301073	2.50489	0.760706	0.53833	12.5426		#N/A
Mir7663	0	0	0	0	0	0	#DIV/0!	#DIV/0!	#DIV/0!	#DIV/0!	0		#N/A
Shroom3	1.34227	0.998736	2.14734	3.49471	6.15448	7.13127	0.00883191	2.50468	0.0442776	1.23559	21.2688		#N/A
Taar1	0	0	0	0	0	0	#DIV/0!	#DIV/0!	#DIV/0!	#DIV/0!	0		#N/A
Nkx6-2	2.60335	2.39586	3.84105	0.789155	0.405959	0.475126	0.00280882	2.50435	0.344311	2.39372	10.5105		#N/A
Amh	0.653518	0.348993	0	0.736127	0	0.176711	0.143626	2.50415	0.536892	2.05856	1.91535		#N/A
Taar2	0	0	0	0	0	0	#DIV/0!	#DIV/0!	#DIV/0!	#DIV/0!	0		#N/A
Taar3	0	0	0	0	0	0	#DIV/0!	#DIV/0!	#DIV/0!	#DIV/0!	0		#N/A
Taar5	0	0	0	0	0	0	#DIV/0!	#DIV/0!	#DIV/0!	#DIV/0!	0		#N/A
Taar7a	0	0	0	0	0	0	#DIV/0!	#DIV/0!	#DIV/0!	#DIV/0!	0		#N/A
Taar6	0	0	0	0	0	0	#DIV/0!	#DIV/0!	#DIV/0!	#DIV/0!	0		#N/A
Taar4	0	0	0	0	0	0	#DIV/0!	#DIV/0!	#DIV/0!	#DIV/0!	0		#N/A
Itih4	0.336	0.179459	0	0.094538	0	0.0909279	0.143667	2.50306	0.980542	0.0561713	0.700925		#N/A
Taar7b	0	0	0	0	0	0	#DIV/0!	#DIV/0!	#DIV/0!	#DIV/0!	0		#N/A
Taar7d	0	0	0	0	0	0	#DIV/0!	#DIV/0!	#DIV/0!	#DIV/0!	0		#N/A
Bmp1	14.6273	12.8567	15.0339	8.39747	8.71421	7.08369	0.039902	0.798859	0.380174	0.568709	66.7133		#N/A
A530016L24Rik	0.392452	0.209614	0.518503	0	0	0.10621	0.143667	2.503	0.517526	2.28743	1.22678		#N/A
Axin2	0.941524	1.00587	0.72433	1.72195	0.657495	0.509876	0.0400758	0.738282	0.332386	1.06733	5.56105		#N/A
Enox2	2.82631	2.1772	3.01563	2.84663	4.96028	4.35011	0.0402225	0.895901	0.0321012	0.667385	20.1762		#N/A
Rasgrp2	12.6379	12.5595	6.98166	4.45829	2.23957	2.20735	1.66856e-05	2.5024	0.10929	1.3632	41.0843		#N/A
Adcy2	0.238143	0.127209	0	0.134013	0	0.0644817	0.143689	2.50233	0.686112	1.05541	0.563847		#N/A
Hapln1	0.196698	0.105073	0	0	0	0.0532671	0.143697	2.50214	0.42265	#DIV/0!	0.355038		#N/A
Taar7e	0	0	0	0	0	0	#DIV/0!	#DIV/0!	#DIV/0!	#DIV/0!	0		#N/A
Taar8a	0	0	0	0	0	0	#DIV/0!	#DIV/0!	#DIV/0!	#DIV/0!	0		#N/A
Taar7f	0	0	0	0	0	0	#DIV/0!	#DIV/0!	#DIV/0!	#DIV/0!	0		#N/A
Id1	305.026	216.278	108.95	84.1614	44.3418	47.6852	0.0402358	-2.502	0.0561249	-1.0693	806.442		#N/A
Snora33	0	0	0	0	0	0	#DIV/0!	#DIV/0!	#DIV/0!	#DIV/0!	0		#N/A
Snord100	0	0	0	0	0	0	#DIV/0!	#DIV/0!	#DIV/0!	#DIV/0!	0		#N/A
Taar8b	0	0	0	0	0	0	#DIV/0!	#DIV/0!	#DIV/0!	#DIV/0!	0		#N/A
Taar9	0	0	0	0	0	0	#DIV/0!	#DIV/0!	#DIV/0!	#DIV/0!	0		#N/A
Taar8c	0	0	0	0	0	0	#DIV/0!	#DIV/0!	#DIV/0!	#DIV/0!	0		#N/A
Cacna1e	0.0254549	0.0815921	0.26808	0.12888	0.461464	0.144818	0.260752	2.50174	0.606589	0.610995	1.11029		#N/A
Slc46a1	0	0.288043	0.237923	0.455537	0.7555	0.875357	0.0499688	2.50127	0.063612	1.23375	2.61236		#N/A
Dab2ip	52.4449	51.4263	34.0378	39.6856	25.9714	34.8381	0.0403735	0.772427	0.344228	0.277826	238.404	FALSE	layer formation in cerebral cortex
Cdkn2a	0.493191	0	0	0	2.78906	0	0.502718	2.49956	0.42265	#DIV/0!	3.28225		#N/A
Tmem245	5.89398	6.24638	4.82178	5.33528	3.38266	4.24851	0.0403928	0.669835	0.128842	0.412507	29.9286		#N/A
Mbp	0.936592	0.474375	0.999286	0.965931	6.68924	1.28749	0.349556	2.49911	0.381597	2.02111	11.3529		#N/A
4930539E08Rik	0.0724534	0.174163	0.191068	0.122313	1.2141	0.176575	0.386938	2.49544	0.409019	2.1498	1.95067		#N/A
Bach1	32.8512	28.0362	46.1833	35.465	46.4805	43.0078	0.0404863	0.555555	0.55851	0.132276	232.024		#N/A
4930401C15Rik	0	0	0	0	0	0	#DIV/0!	#DIV/0!	#DIV/0!	#DIV/0!	0		#N/A
F2rl3	2.65545	2.9453	1.62331	0.862752	0	0.994329	0.0470169	2.49382	0.355642	1.32207	9.08114		#N/A
Mir6905	0	0	0	0	0	0	#DIV/0!	#DIV/0!	#DIV/0!	#DIV/0!	0		#N/A
Vcam1	55.6736	22.1837	109.755	94.8416	276.283	161.528	0.0948598	2.4914	0.181433	1.09753	720.265	TRUE	cell chemotaxis
Gm8709	0	0	0	0	0	0	#DIV/0!	#DIV/0!	#DIV/0!	#DIV/0!	0		#N/A
Kcnq4	1.9299	1.21484	1.27518	1.51321	0	0.559558	0.104395	2.49058	0.0670356	2.31707	6.49269		#N/A
Ablim3	67.5594	63.8439	42.4638	36.9773	11.4051	12.0263	0.00121505	-2.48749	0.00957902	-1.76144	234.276		#N/A
Arhgef40	6.51604	6.43081	3.55893	3.61684	4.29184	3.14784	0.0407566	0.799289	0.839206	0.0521069	27.5623		#N/A
Cyyr1	85.597	75.6801	56.6284	56.5715	37.7677	49.5581	0.0407667	0.885062	0.159428	0.374393	361.803		#N/A
2010109I03Rik	0.189082	0	0	0	1.05973	0	0.503546	2.48661	0.42265	#DIV/0!	1.24881		#N/A
Tmem45a	0.127564	0	2.35923	0.107709	0.713668	0	0.503713	2.48403	0.535242	1.7894	3.30817		#N/A
Stk32a	0.0893268	0.143144	0.353551	0.452438	0.499194	0.79809	0.0726008	2.48037	0.259013	0.686662	2.33574		#N/A
2310057J18Rik	0	0	0	0	0	0	#DIV/0!	#DIV/0!	#DIV/0!	#DIV/0!	0		#N/A
Soga3	0	0	0	0	0	0	#DIV/0!	#DIV/0!	#DIV/0!	#DIV/0!	0		#N/A
Il27ra	3.11145	3.21989	7.02236	7.66266	16.8644	18.4202	0.0028889	2.47846	0.0066043	1.26469	56.301		#N/A
9330159F19Rik	0	0	0.23116	0	0	0	#DIV/0!	#DIV/0!	0.42265	#NUM!	0.23116		#N/A
Llgl1	9.30694	8.31301	5.94819	6.84855	6.45237	6.06018	0.0410892	0.493834	0.799532	0.0324005	42.9292		#N/A
Cd69	1.12384	0.540134	0	0.56968	7.25105	2.00551	0.286885	2.47584	0.241436	4.02225	11.4902		#N/A
Dnmt1	10.4608	10.9137	9.88719	9.5614	12.2934	11.9098	0.0413157	0.179307	0.0110195	0.315532	65.0263		#N/A
Hemk1	1.27914	1.40904	1.05729	0.405095	0.223844	0.259557	0.00371286	2.47534	0.272664	1.59703	4.63397		#N/A
Nbeal1	4.35446	3.70347	4.67757	4.32826	2.4961	2.2363	0.0416666	0.767837	0.0102186	0.928287	21.7962		#N/A
Fcrl1	0.715834	0.154575	0	0	0	0.156567	0.345242	2.47491	0.42265	#DIV/0!	1.02698		#N/A
Esrp1	0.0845188	0.0677203	0.222977	0.214037	0.708389	0.137303	0.348725	2.47379	0.548541	0.952453	1.43495		#N/A
Lmbr1	3.49816	2.96469	4.07959	3.86113	1.97245	1.74887	0.0417477	0.796356	0.00544368	1.09346	18.1249		#N/A
Tcf15	51.2669	34.7333	18.722	19.6449	8.03969	7.44823	0.0508851	-2.4732	0.00228762	-1.30872	139.855		#N/A
Snord22	339.258	521.205	0	0	0	0	0.0419207	#NUM!	#DIV/0!	#DIV/0!	860.463		#N/A
Heyl	5.29139	2.70876	5.23294	2.54335	0.307884	1.13432	0.136758	2.47175	0.153228	2.43081	17.2186		#N/A
Xlr4a	0	0.258356	0	0	0.907539	0.522837	0.127183	2.46896	0.0653267	#DIV/0!	1.68873		#N/A
Ten1	2.28209	3.2889	1.2196	1.93065	5.1562	5.17125	0.0420112	0.890478	0.00967709	1.71295	19.0487		#N/A
Clvs2	0	0	0	0	0	0	#DIV/0!	#DIV/0!	#DIV/0!	#DIV/0!	0		#N/A
Sult3a1	0	0	0	0	0	0	#DIV/0!	#DIV/0!	#DIV/0!	#DIV/0!	0		#N/A
Gm4794	0	0	0	0	0	0	#DIV/0!	#DIV/0!	#DIV/0!	#DIV/0!	0		#N/A
Stat2	14.8789	15.4498	10.8116	11.4699	12.616	11.4083	0.0420835	0.336189	0.332704	0.108648	76.6345		#N/A
Fads6	0	0.246367	0	0	0.865018	0.498632	0.127067	2.46859	0.0652076	#DIV/0!	1.61002		#N/A
Gm3258	0	0	0	0	0	0	#DIV/0!	#DIV/0!	#DIV/0!	#DIV/0!	0		#N/A
A530032D15Rik	0	0.163838	0.541805	0.172773	0.573409	0.331869	0.126267	2.46609	0.707624	0.341269	1.78369		#N/A
Trdn	0	0	0	0	0	0	#DIV/0!	#DIV/0!	#DIV/0!	#DIV/0!	0		#N/A
D830005E20Rik	0	0	0	0	0	0	#DIV/0!	#DIV/0!	#DIV/0!	#DIV/0!	0		#N/A
Copz1	19.619	17.287	19.9317	14.5485	28.1238	25.4637	0.0421488	0.538041	0.0861818	0.636128	124.974		#N/A
5730408K05Rik	3.51184	0	0	0	17.9647	1.40953	0.447551	2.46384	0.362465	#DIV/0!	22.8861		#N/A
Scaper	2.64261	2.92413	6.55193	3.08014	4.30404	5.0607	0.0423364	0.750406	0.946876	0.0406069	24.5635		#N/A
Kbtbd8	0	0.0590241	0	0	0.205759	0.119695	0.125244	2.46308	0.0633567	#DIV/0!	0.384478		#N/A
2700081O15Rik	29.9118	24.9795	18.577	19.9732	13.5495	15.8224	0.0424271	0.902141	0.0750768	0.392302	122.813		#N/A
Mfrp	0.295988	0.162966	2.52e-66	0.253975	1.82e-21	0.0833133	0.139077	2.46173	0.588515	1.60807	0.796242		#N/A
Trappc3l	0	0	0	0	0	0	#DIV/0!	#DIV/0!	#DIV/0!	#DIV/0!	0		#N/A
Fam26d	0	0	0	0	0	0	#DIV/0!	#DIV/0!	#DIV/0!	#DIV/0!	0		#N/A
Cd14	3.44641	1.57745	5.22444	8.94411	15.893	11.7787	0.0375819	2.46154	0.135305	0.965719	46.8641		#N/A
Prr14	17.6424	16.1005	10.1422	12.3077	12.2397	10.4603	0.0425782	0.571892	0.937028	0.0159833	78.8928		#N/A
Arsj	0.0912493	0.146224	0	0.23109	0.637458	0.667024	0.00340488	2.45764	0.044021	2.49695	1.77305		#N/A
Lpxn	0.649956	0.520638	0.861241	0	6.07613	0.351499	0.455493	2.45705	0.437741	2.8998	8.45946		#N/A
Hs3st5	0	0	0	0	0	0	#DIV/0!	#DIV/0!	#DIV/0!	#DIV/0!	0		#N/A
Il6st	117.573	77.456	399.074	387.73	543.39	527.3	0.00242763	2.45678	0.00477472	0.444465	2052.52		#N/A
Rfpl4b	0	0	0	0	0	0	#DIV/0!	#DIV/0!	#DIV/0!	#DIV/0!	0		#N/A
Kifc3	25.1586	20.1912	13.8677	10.1022	3.75713	4.53337	0.0179122	2.45157	0.0551949	1.53169	77.6102		#N/A
Ost4	82.4588	73.5179	96.4806	74.5692	98.9617	98.8178	0.0428388	0.342562	0.346838	0.209476	524.806		#N/A
Grhl1	0.584777	0.390439	0.145016	0.278215	0	0.1784	0.0943538	2.45061	0.386154	1.24633	1.57685		#N/A
Dcp2	4.55989	4.40888	5.50904	5.72446	8.09594	6.82925	0.0429346	0.734767	0.102795	0.409942	35.1275		#N/A
Glg1	37.8306	31.1457	32.6221	38.5267	49.9401	52.5756	0.0429646	0.571672	0.0399649	0.526934	242.641		#N/A
Asap3	1.41935	1.70596	3.74129	9.43383	8.33772	8.74494	0.00127049	2.45046	0.56424	0.374717	33.3831	TRUE	cell migration
1700066M21Rik	0.340483	0.272795	0	0.383285	0.476023	0.460806	0.043032	0.611245	0.285788	1.28937	1.93339		#N/A
AI317395	0	0	0	0.217073	0	0	#DIV/0!	#DIV/0!	0.42265	#NUM!	0.217073		#N/A
Arhgap9	1.18818	0.794859	2.88464	1.16757	7.77366	3.05157	0.203018	2.44861	0.310048	1.41762	16.8605		#N/A
Mgst2	6.62835	0.662957	4.48533	2.81029	0	1.33633	0.432744	2.4479	0.108628	2.44875	15.9233		#N/A
Fbxo45	3.22886	3.51583	4.80495	2.72557	4.0476	4.03498	0.0431361	0.261064	0.815495	0.102066	22.3578	FALSE	cerebral cortex tangential migration
Olfr613	2.45008	2.73815	2.37978	3.26521	1.8903	1.93813	0.0431533	0.43849	0.177044	0.560218	14.6616		#N/A
Ptger4	13.2963	11.6392	10.5719	4.68234	7.76959	6.05149	0.0431609	0.851331	0.837027	0.14234	54.0108		#N/A
Mta3	9.06014	7.78086	9.27503	9.37975	13.5665	12.1516	0.0432021	0.610806	0.0380582	0.463239	61.2139		#N/A
Ak5	0.219469	0.439599	0.724376	0.370579	2.60781	0.980224	0.216468	2.44469	0.273123	1.71232	5.34206		#N/A
Notch4	68.7265	76.6131	29.1356	27.3447	12.968	13.7691	0.00443764	-2.44251	0.00432274	-1.0789	228.557		#N/A
Ppp2r2b	0.1697	0.109538	0	0.115449	0	0	0.0434182	#NUM!	0.42265	#NUM!	0.394687		#N/A
Ddo	0	0	0	0	0	0	#DIV/0!	#DIV/0!	#DIV/0!	#DIV/0!	0		#N/A
Slc22a16	0	0	0	0	0	0	#DIV/0!	#DIV/0!	#DIV/0!	#DIV/0!	0		#N/A
Tnfrsf11b	0.121705	0.097508	0	0	1.19135	0	0.500307	2.44219	0.42265	#DIV/0!	1.41056		#N/A
Gpr6	0	0	0	0	0	0	#DIV/0!	#DIV/0!	#DIV/0!	#DIV/0!	0		#N/A
1810011H11Rik	0.501666	0.602737	0	0.423893	0	0.203409	0.058071	2.44081	0.685259	1.05932	1.73171		#N/A
Adam1a	0.44061	1.50033	0	0.278994	0	0.357802	0.292592	2.43952	0.878096	0.358927	2.57774		#N/A
Slc22a5	4.38634	4.48082	5.35667	6.29549	7.35814	6.32254	0.0436398	0.625596	0.283821	0.231543	34.2		#N/A
Nucb1	77.8807	67.1031	75.2749	80.4363	123.728	149.179	0.0436478	0.912518	0.0457571	0.809537	573.602		#N/A
Ppp1r16b	24.3177	24.0103	19.0295	17.7907	15.7869	18.7509	0.0436589	0.484683	0.551081	0.0923213	119.686		#N/A
Plag1	0	0	0	0.12118	0.30071	0.466512	0.043666	#DIV/0!	0.0879261	2.66249	0.888402		#N/A
Ppil6	0	0	0	0.932832	0	0	#DIV/0!	#DIV/0!	0.42265	#NUM!	0.932832		#N/A
3632451O06Rik	0.25011	0.300575	0.825943	0.105589	0	0.101537	0.05822	2.43922	0.372104	3.1976	1.58375		#N/A
Kdm6b	102.573	107.835	88.6196	77.0647	63.5406	77.5669	0.0436907	0.576395	0.308867	0.231642	517.2		#N/A
Plekho2	27.1995	30.4914	31.5963	30.8644	37.432	36.3219	0.0437298	0.354376	0.013581	0.239771	193.905		#N/A
Nubpl	1.93166	1.547	4.28144	1.36073	2.71705	2.60891	0.0437392	0.61451	0.923721	0.0832085	14.4468		#N/A
Pgbd5	0.485703	0.583708	0.160375	0	0	0.197188	0.0582245	2.43917	0.898119	0.298122	1.42697		#N/A
Sirt5	1.09962	0.88073	2.18999	1.62623	6.95065	3.78889	0.109779	2.4391	0.163869	1.49272	16.5361		#N/A
5730435O14Rik	0	0	0	0	0	0	#DIV/0!	#DIV/0!	#DIV/0!	#DIV/0!	0		#N/A
Fkrp	6.23557	5.87747	8.23595	6.81335	9.06202	8.04132	0.043913	0.497717	0.361542	0.184582	44.2657		#N/A
Slco1c1	0.21404	0.257236	0	0	0	0.0869092	0.0582414	2.43899	0.42265	#DIV/0!	0.558185		#N/A
Cdh4	0.880718	0.456641	1.77482	2.5797	2.74743	4.50413	0.0820424	2.4389	0.272562	0.735778	12.9434		#N/A
Tnks1bp1	40.452	35.908	31.9109	28.3303	17.1392	23.4495	0.0441498	0.911739	0.113548	0.569672	177.19		#N/A
Kctd4	0.90537	0.0906728	0.597721	0.286645	0	0.183798	0.433362	2.43809	0.192074	2.26652	2.06421		#N/A
Nr2e1	0	0	0	0	0	0	#DIV/0!	#DIV/0!	#DIV/0!	#DIV/0!	0		layer formation in cerebral cortex
Adra1b	0.423736	0.509265	1.11876	0.357737	0	0.172169	0.0583157	2.43805	0.236552	3.10028	2.58167		#N/A
Phf21b	2.81741	2.03895	1.07902	0.767102	0.380721	0.516605	0.0376078	2.43617	0.10813	1.04079	7.59981		#N/A
Auts2	5.0518	4.39619	1.00212	2.97997	2.80512	3.17778	0.0442449	0.659162	0.424921	0.587319	19.413	FALSE	neuron migration
Ccdc136	0.105852	0.169626	0	0.714976	0.887807	0.60178	0.0536173	2.4349	0.420385	1.05895	2.48004		#N/A
Ehd2	220.813	188.704	164.094	146.619	117.962	131.519	0.0443028	0.714993	0.109459	0.316653	969.711		#N/A
Wfdc18	14.0742	4.50418	0	0.796247	2.6876	0.75596	0.261229	2.43165	0.332701	2.11261	22.8182		#N/A
Fads2	8.78737	6.64758	7.44619	3.71238	0.685123	2.17752	0.0404631	2.43078	0.175176	1.96273	29.4562		#N/A
Rabl6	14.9842	14.0783	17.2197	14.4707	17.0277	17.9461	0.0444704	0.267116	0.374807	0.142229	95.7267		#N/A
Tjap1	14.5266	15.3434	9.24271	11.5858	11.9883	10.6299	0.0446028	0.401213	0.576677	0.118924	73.3167		#N/A
F830002L21Rik	0	0	0	0	0	0	#DIV/0!	#DIV/0!	#DIV/0!	#DIV/0!	0		#N/A
1700027J07Rik	0	0	0	0	0	0	#DIV/0!	#DIV/0!	#DIV/0!	#DIV/0!	0		#N/A
Speer5-ps1	0	0	0	0	0	0	#DIV/0!	#DIV/0!	#DIV/0!	#DIV/0!	0		#N/A
H2afy2	3.17102	2.09197	1.9753	1.73308	0.522679	0.45408	0.0581392	2.42981	0.00838679	1.92471	9.94813		#N/A
43719	26.0196	19.3104	25.5731	27.103	37.7142	38.4584	0.0447134	0.748806	0.00520184	0.532124	174.179		#N/A
Gm10814	0	0.289352	0.956043	0.152536	1.26492	0.293109	0.337379	2.42882	0.755607	0.491011	2.95596		#N/A
Popdc3	0	0	0	0	0	0	#DIV/0!	#DIV/0!	#DIV/0!	#DIV/0!	0		#N/A
Chst10	0	0.349748	0	0.276407	1.52556	0.35449	0.337108	2.42638	0.314161	2.7659	2.50621		#N/A
Mgat5	4.82664	5.09759	5.06888	7.50163	6.4406	5.9684	0.0448034	0.32236	0.953964	0.0186563	34.9037		#N/A
Scn8a	0.144034	0.323221	0.265506	0.218802	0.0401329	0.0468068	0.167991	2.42612	0.0138049	2.47784	1.0385		#N/A
Bves	0	0	0	0	0	0	#DIV/0!	#DIV/0!	#DIV/0!	#DIV/0!	0		cell migration involved in heart development
Lin28b	0	0	0	0	0	0	#DIV/0!	#DIV/0!	#DIV/0!	#DIV/0!	0		#N/A
Adra2a	20.1626	9.49465	12.0167	7.53974	2.71801	2.80129	0.152017	2.42583	0.0884619	1.82509	54.733		#N/A
C130030K03Rik	0	0	0	0	0	0	#DIV/0!	#DIV/0!	#DIV/0!	#DIV/0!	0		#N/A
Fbln7	1.76412	0.282681	0.310625	1.19156	0	0.381992	0.390174	2.42176	0.363646	1.97545	3.93098		#N/A
Mir1929	0	0	0	0	0	0	#DIV/0!	#DIV/0!	#DIV/0!	#DIV/0!	0		#N/A
Grik2	0	0	0	0.0585742	0	0	#DIV/0!	#DIV/0!	0.42265	#NUM!	0.0585742		#N/A
Dusp27	0.0832901	0.066736	0	0.0703079	0.465377	0.338273	0.0363712	2.42135	0.0370646	3.51481	1.02398		#N/A
Sim1	0	0	0	0	0	0	#DIV/0!	#DIV/0!	#DIV/0!	#DIV/0!	0		#N/A
Gprc6a	0	0	0	0	0	0	#DIV/0!	#DIV/0!	#DIV/0!	#DIV/0!	0		#N/A
Fam162b	0	0	0	0	0	0	#DIV/0!	#DIV/0!	#DIV/0!	#DIV/0!	0		#N/A
Rgs3	39.346	46.2862	26.7424	25.9085	27.1957	26.7596	0.0449659	0.666389	0.300024	0.0353065	192.238		#N/A
Rfx6	0	0	0	0	0	0	#DIV/0!	#DIV/0!	#DIV/0!	#DIV/0!	0		#N/A
Anapc7	7.99723	7.50848	5.9421	4.32575	6.29128	6.59474	0.044996	0.266993	0.252384	0.327673	38.6596		#N/A
4933411G06Rik	0	0	0	0	0	0	#DIV/0!	#DIV/0!	#DIV/0!	#DIV/0!	0		#N/A
Vgll2	0	0	0	0	0	0	#DIV/0!	#DIV/0!	#DIV/0!	#DIV/0!	0		#N/A
Ros1	0	0	0	0	0	0	#DIV/0!	#DIV/0!	#DIV/0!	#DIV/0!	0		#N/A
Trpc6	2.39498	1.08607	2.33661	1.77927	0.472953	0.177162	0.16937	2.42076	0.031583	2.66243	8.24704		#N/A
Fndc1	1.29655	1.03891	2.37723	1.9031	7.55344	4.94657	0.0604571	2.42015	0.09009	1.54614	19.1158		#N/A
Zfa-ps	0	0	0.391622	0	0	0	#DIV/0!	#DIV/0!	0.42265	#NUM!	0.391622		#N/A
Tnfrsf14	7.39827	8.14464	2.47164	7.82395	11.1023	10.1031	0.0452447	0.448175	0.182998	1.04241	47.0439		#N/A
Ldb2	49.2825	43.5409	59.4138	60.2558	77.3908	67.458	0.0453485	0.641987	0.127452	0.275491	357.342		#N/A
Tmem158	5.20357	5.00198	4.68732	5.80239	20.1344	34.4476	0.0901967	2.41907	0.0916723	2.37945	75.2773		#N/A
Sirpa	17.6801	4.00958	28.6607	25.6784	68.3546	47.5934	0.0630428	2.4184	0.0989904	1.09342	191.977	TRUE	granulocyte migration
Adrb2	16.3327	14.8128	15.6874	14.1831	11.4307	12.1317	0.0454249	0.402537	0.0627708	0.342235	84.5784		#N/A
Slc20a1	24.8553	21.5124	16.6785	17.8676	14.6259	11.7339	0.0455026	0.814781	0.120163	0.390183	107.274		#N/A
Spata5l1	6.55515	6.84808	2.6498	4.57654	5.60638	5.08295	0.0455384	0.326409	0.224972	0.564834	31.3189		#N/A
Crispld1	1.67325	1.80993	0.993205	0.423734	0.584329	0.0679568	0.0338079	2.41683	0.424694	1.1192	5.5524		#N/A
Klk8	1.70851	0.45613	2.6474	1.92524	4.40104	7.15595	0.0900159	2.41657	0.13372	1.33767	18.2943		#N/A
Map3k11	47.727	47.5885	27.8678	34.1711	24.8189	33.0943	0.0456407	0.718819	0.729976	0.0992809	215.268		#N/A
Dennd2d	0.661787	0.397684	1.63675	2.0246	3.35023	2.28426	0.0530749	2.41094	0.224082	0.621909	10.3553		#N/A
Yrdc	16.268	14.9193	17.5065	13.1471	12.2395	12.6206	0.0457257	0.327127	0.316583	0.302224	86.701		#N/A
Oaf	7.57542	8.40328	8.47308	11.4408	10.1932	10.9982	0.0457314	0.407329	0.718137	0.0897046	57.084		#N/A
Crabp2	1.3732	2.56539	0	0.387245	0	0.740868	0.15039	2.41039	0.713432	0.93597	5.0667		#N/A
4930467K11Rik	0	0	0	0	0	0	#DIV/0!	#DIV/0!	#DIV/0!	#DIV/0!	0		#N/A
Cited2	17.4882	13.2875	23.8602	27.2575	26.5178	30.5779	0.0459026	0.89159	0.376033	0.159559	138.989		#N/A
Ptk2b	3.7786	1.23855	4.66137	6.23944	12.9483	13.6589	0.0145986	2.40688	0.011925	1.28738	42.5252	TRUE	blood vessel endothelial cell migration
Dux	0	0	0	0	0	0	#DIV/0!	#DIV/0!	#DIV/0!	#DIV/0!	0		#N/A
Alx4	0.190873	0.356867	0.670937	0.537012	0	0.103381	0.151	2.40552	0.022666	3.54652	1.85907		#N/A
Ch25h	22.4614	16.6576	64.0688	43.5888	32.332	33.0477	0.0461791	0.740973	0.175182	0.719536	212.156	FALSE	B cell chemotaxis
Gm4981	0	0	0	0	0	0	#DIV/0!	#DIV/0!	#DIV/0!	#DIV/0!	0		#N/A
Pard6b	0.497819	0.239318	0	0.504318	0.139142	0	0.178563	2.40537	0.557402	1.85778	1.3806		#N/A
Sat2	0	0.376224	1.25624	1.19272	1.99151	0	0.50904	2.4042	0.839758	0.298306	4.81669		#N/A
Mgl2	0.709409	0	1.56777	0.199793	2.98609	0.767152	0.321391	2.40345	0.525779	1.08638	6.23021		#N/A
Prrg3	4.69196	4.69954	2.64991	2.16857	0.779618	0.998434	0.000825996	2.40106	0.0289363	1.43828	15.988		#N/A
BB019430	0	0	0	0	0	0	#DIV/0!	#DIV/0!	#DIV/0!	#DIV/0!	0		#N/A
Rasd1	26.0881	26.8936	19.245	25.1071	2.86386	7.17625	0.0102764	-2.39972	0.0421602	-2.14323	107.374		#N/A
BC021614	0.676988	0.541806	3.64577	0.573492	0.962222	5.46705	0.367077	2.3992	0.724499	0.607665	11.8673		#N/A
Prrt4	0.594775	0.476547	1.30827	0.669488	2.90919	2.73726	0.00207352	2.39795	0.0310087	1.51348	8.69553		#N/A
Arhgap31	53.3858	57.4564	43.3509	45.8034	41.6093	45.1347	0.0464808	0.353671	0.631126	0.0395404	286.74		#N/A
Enpep	10.645	4.39199	13.6203	3.08461	1.88623	0.96795	0.193717	2.39737	0.320529	2.54912	34.5961	TRUE	cell migration
Mterf1a	0	0.220982	0	0.466516	1.16326	0	0.509596	2.39617	0.634157	1.31818	1.85076		#N/A
1500009L16Rik	0.321617	0.257573	1.28312	0.815612	2.2619	0.781884	0.238078	2.39376	0.604548	0.536348	5.72171		#N/A
Gab2	9.31816	8.34375	6.28395	8.18827	4.51241	5.83329	0.0468264	0.77161	0.216945	0.484255	42.4798	FALSE	cell migration
Itga2	0.871667	0.952401	2.0902	2.94314	5.64454	3.92653	0.0459197	2.39152	0.141669	0.927164	16.4285	TRUE	substrate-dependent cell migration
Psma8	0.213739	0.342427	0.283193	0.541691	2.39758	0.520175	0.336264	2.39127	0.384531	1.8226	4.2988		#N/A
Ssh3	5.42	4.34239	6.32715	7.34345	7.22779	7.57326	0.0469192	0.600393	0.402734	0.114623	38.234		#N/A
Serpinc1	0	0.130255	0	0.137312	0.682918	0	0.51	2.39037	0.5155	2.31425	0.950485		#N/A
Zfp46	45.8485	50.2473	77.0082	81.6384	66.3267	75.6575	0.0470006	0.563185	0.250809	0.160086	396.727		#N/A
Matn4	0	0.125007	0	0	0.655295	0	0.510017	2.39014	0.42265	#DIV/0!	0.780302		#N/A
Myo18a	29.3045	25.7713	18.737	19.9049	19.8692	18.7719	0.0471229	0.511282	0.999647	2.98683e-05	132.359	FALSE	cell migration
Mir6906	0	0	0	0	0	0	#DIV/0!	#DIV/0!	#DIV/0!	#DIV/0!	0		#N/A
Supt6	28.3731	25.3275	31.0276	34.1068	33.5292	34.7745	0.047203	0.347026	0.440693	0.068544	187.139		#N/A
Pcsk5	3.21187	3.70004	3.30568	3.39222	1.9893	2.31593	0.0472075	0.682994	0.0193664	0.637619	17.915		#N/A
Mir6408	0	0	0	0	0	0	#DIV/0!	#DIV/0!	#DIV/0!	#DIV/0!	0		#N/A
Gm20611	0	0	0	0	0	0	#DIV/0!	#DIV/0!	#DIV/0!	#DIV/0!	0		#N/A
Pldi	0	0	0	0	0	0	#DIV/0!	#DIV/0!	#DIV/0!	#DIV/0!	0		#N/A
Slfn1	0.385033	0	0.764664	0.162614	1.07909	0.937247	0.0578352	2.38868	0.220352	1.12066	3.32865		#N/A
Vmn1r58	1.02793	0.926498	1.35798	1.19342	0.718878	0.625943	0.0473395	0.539332	0.0236662	0.923875	5.85065		#N/A
Gm14379	0.190099	0	0	0	0.532733	0.462751	0.0578296	2.38865	0.00490568	#DIV/0!	1.18558		#N/A
Tdrd7	10.5971	9.52438	9.60519	7.77895	5.92255	7.11012	0.0473727	0.626604	0.183838	0.415639	50.5383		#N/A
Arid3a	1.11142	1.18678	0.586573	0.416694	0.976247	0.929672	0.0474045	0.270018	0.0360357	0.925781	5.20739		#N/A
Gm13154	0	0.0971734	0.320381	0.102405	0.508821	0	0.51013	2.38852	0.890755	0.267231	1.02878		#N/A
Nisch	43.7898	45.7425	32.9455	34.2159	30.6039	35.5299	0.0476501	0.43702	0.858601	0.0222445	222.828		#N/A
Nap1l3	0.121379	0.0972476	0.320626	0.409933	0.848685	0.295669	0.236418	2.38799	0.537025	0.647461	2.09354		#N/A
Rpl28	684.797	562.745	618.826	592.05	895.454	891.267	0.047664	0.518226	0.00220766	0.561263	4245.14		#N/A
Gm17455	0	0	0	0	0	0	#DIV/0!	#DIV/0!	#DIV/0!	#DIV/0!	0		#N/A
Npffr1	0	0	0	0	0	0	#DIV/0!	#DIV/0!	#DIV/0!	#DIV/0!	0		#N/A
Tcirg1	20.8766	20.6287	15.0835	19.3078	24.571	26.7963	0.0478755	0.307555	0.0708056	0.578807	127.264		#N/A
Gnaq	26.475	21.1202	33.8116	25.2619	39.1628	35.9298	0.048048	0.657855	0.221778	0.34616	181.761		#N/A
Negr1	0	0	0.262169	0.111905	0.428095	0.269369	0.0480859	#DIV/0!	0.277108	0.898795	1.07154		#N/A
Phyhip	0.123071	0	0	0	0.344221	0.299784	0.0576858	2.38758	0.00472741	#DIV/0!	0.767076		#N/A
Wnt9a	0.102155	0.163696	0.269667	0.172483	1.14219	0.248887	0.335764	2.38751	0.401678	1.65359	2.09908		#N/A
Stk32b	0	0.0787617	0	0	0.41212	0	0.510201	2.3875	0.42265	#DIV/0!	0.490882		#N/A
Dmkn	3.20458	1.50158	0	0.14402	0.754118	0.145582	0.169959	2.38703	0.350376	2.64317	5.74988		#N/A
Pllp	1.322	1.66419	1.50007	1.11664	0.264617	0.306489	0.0197739	2.38648	0.0337629	2.19592	6.17401		#N/A
4930523C07Rik	11.5764	10.2244	11.6004	13.3507	6.32094	7.53329	0.0484574	0.654055	0.0348986	0.848777	60.6061		#N/A
Neurog3	0	0	0.631843	0	0	0	#DIV/0!	#DIV/0!	0.42265	#NUM!	0.631843		#N/A
Pcyt1b	0	0.054626	0	0	0.285563	0	0.510296	2.38615	0.42265	#DIV/0!	0.340189		#N/A
Gpr179	0	0.0280906	0.0461634	0	0.146696	0	0.5104	2.38467	0.580416	1.66801	0.22095		#N/A
Hs6st2	0	0.0570193	0.306227	0.653411	0.108074	0.188624	0.135836	2.37947	0.203953	1.6935	1.31336		#N/A
Mir7662	0	0	0	0	0	0	#DIV/0!	#DIV/0!	#DIV/0!	#DIV/0!	0		#N/A
Mtl5	0.31348	0.278139	0	0.146618	0.486235	0.422637	0.0487791	0.619409	0.0412576	2.63201	1.64711		#N/A
Pcdha3	0.0790584	6.05e-08	0.250247	1.02e-07	0.0101778	0.00505165	0.504995	2.37606	0.446876	4.03842	0.344535		#N/A
Mir5108	0	0	0	0	0	0	#DIV/0!	#DIV/0!	#DIV/0!	#DIV/0!	0		#N/A
Hkdc1	0	0	0	0	0	0	#DIV/0!	#DIV/0!	#DIV/0!	#DIV/0!	0		#N/A
Prickle4	1.87568	1.50233	1.77843	2.4908	0	0.651769	0.0682322	2.37374	0.0644329	2.71154	8.29901		#N/A
Nid2	34.1171	37.1393	16.1278	12.7922	7.40154	6.34945	0.00308245	-2.37348	0.0492687	-1.07253	113.927		#N/A
Mtf1	4.88158	4.01461	3.10226	3.97516	2.44953	2.60972	0.0489535	0.814264	0.150817	0.4843	21.0329		#N/A
1600029O15Rik	0.594836	1.90601	0.525138	1.50739	0	0.482622	0.285441	2.37345	0.292398	2.07431	5.016		#N/A
Cdc42bpa	12.0407	11.5178	13.7266	10.2564	9.86814	8.89801	0.0490278	0.328115	0.28464	0.353879	66.3076	FALSE	cell migration
Snrk	91.0286	81.351	61.8818	66.3089	54.649	62.7768	0.0490307	0.55384	0.364793	0.126542	417.996		#N/A
Snx33	8.60834	5.72848	8.75357	11.3302	13.5491	13.3342	0.0491098	0.906985	0.119273	0.42068	61.3039		#N/A
Nupl2	0.470433	0.471134	0.310625	0.297891	0.328891	0.381992	0.0491241	0.405452	0.201688	0.224317	2.26097		#N/A
Tlcd2	1.82644	1.25392	2.26107	1.32289	2.86954	2.75036	0.0491501	0.867445	0.164209	0.64899	12.2842		#N/A
Glipr2	2.80513	2.38764	5.33564	4.29416	12.5232	14.3702	0.00752842	2.37268	0.0147529	1.48167	41.716		#N/A
Mir7215	0	0	0	0	0	0	#DIV/0!	#DIV/0!	#DIV/0!	#DIV/0!	0		#N/A
Chrm1	0.0530602	0.170155	0	0.0447811	0	0.0431116	0.285713	2.37229	0.981012	0.0548139	0.311108		#N/A
Dll1	14.0108	11.7001	23.6992	28.2374	22.8891	28.2871	0.0492706	0.993093	0.923977	0.0212785	128.824		#N/A
9330182L06Rik	0.0719126	0.230485	0	0.121399	0	0.0584195	0.285628	2.37192	0.68615	1.05523	0.482216		#N/A
Ces2e	11.4685	10.8127	2.33538	1.19249	1.73037	2.5775	0.00353399	2.37078	0.638519	0.288177	30.1169		#N/A
Atoh7	0	0	0	0	0	0	#DIV/0!	#DIV/0!	#DIV/0!	#DIV/0!	0		#N/A
Mypn	0	0	0	0	0	0	#DIV/0!	#DIV/0!	#DIV/0!	#DIV/0!	0		#N/A
Egln3	3.60358	0.824886	9.69136	7.49813	12.9608	9.92679	0.0462559	2.36969	0.26742	0.413039	44.5055		#N/A
Guca2a	0.896105	1.43394	0	0	0	0	0.0493684	#NUM!	#DIV/0!	#DIV/0!	2.33005		#N/A
Hist1h2bm	1.14281	1.82873	0	0.971419	0	0	0.0493699	#NUM!	0.42265	#NUM!	3.94296		#N/A
1700034P13Rik	6.66213	5.73156	2.61835	5.62916	4.15572	4.20214	0.0493834	0.5684	0.974095	0.019175	28.9991		#N/A
Krtdap	1.26421	2.02327	0	0	0	0	0.0493954	#NUM!	#DIV/0!	#DIV/0!	3.28748		#N/A
1700023F02Rik	0	0	0	0	0	0	#DIV/0!	#DIV/0!	#DIV/0!	#DIV/0!	0		#N/A
Lipt2	0.310621	0.497544	1.23878	0.525116	0	0	0.0495538	#NUM!	0.132039	#NUM!	2.57206		#N/A
Myf6	0.304961	0.488483	0	0	0	0	0.0495557	#NUM!	#DIV/0!	#DIV/0!	0.793444		#N/A
Sftpd	0.283735	0.454503	0	0	0	0	0.0495638	#NUM!	#DIV/0!	#DIV/0!	0.738238		#N/A
Lrrtm3	0	0	0.11503	0	0	0	#DIV/0!	#DIV/0!	0.42265	#NUM!	0.11503		#N/A
Derl3	0.281226	0.450485	0	0	0	0	0.0495642	#NUM!	#DIV/0!	#DIV/0!	0.731711		#N/A
LOC102634101	0	0	0	0	0	0	#DIV/0!	#DIV/0!	#DIV/0!	#DIV/0!	0		#N/A
Cabp4	0.259006	0.41491	0	0.656588	0	0	0.0495725	#NUM!	0.42265	#NUM!	1.3305		#N/A
Car11	0.257537	0.412559	0	0	0	0	0.0495736	#NUM!	#DIV/0!	#DIV/0!	0.670096		#N/A
Prss50	0.254446	0.40761	0	0.215004	0	0	0.0495748	#NUM!	0.42265	#NUM!	0.87706		#N/A
Cyp2t4	0.243346	0.389837	0	0	0	0	0.0495789	#NUM!	#DIV/0!	#DIV/0!	0.633183		#N/A
Hpdl	0.227665	0.364728	0	0	0	0	0.049585	#NUM!	#DIV/0!	#DIV/0!	0.592393		#N/A
4930545H06Rik	0	0	0	0	0	0	#DIV/0!	#DIV/0!	#DIV/0!	#DIV/0!	0		#N/A
Tmem178	0.213309	0.341739	0.847855	0.360399	0	0	0.0495904	#NUM!	0.131428	#NUM!	1.7633		#N/A
Hes3	0.195836	0.313757	0	0.165422	0	0	0.0495971	#NUM!	0.42265	#NUM!	0.675015		#N/A
A930024E05Rik	0.188522	0.302042	0	0	0	0	0.049599	#NUM!	#DIV/0!	#DIV/0!	0.490564		#N/A
Gp2	0.179376	0.287394	0	0	0	0	0.0496025	#NUM!	#DIV/0!	#DIV/0!	0.46677		#N/A
Nodal	0.336717	0.539496	0	0.284377	0	0	0.0496068	#NUM!	0.42265	#NUM!	1.16059	#NUM!	cell migration
2310015B20Rik	0	0	0	0	0	0	#DIV/0!	#DIV/0!	#DIV/0!	#DIV/0!	0		#N/A
Igfals	0.166857	0.267343	0.220721	0	0	0	0.0496073	#NUM!	0.42265	#NUM!	0.654921		#N/A
4930507D05Rik	0.63957	1.02475	0.422917	0.540127	0	0	0.0496097	#NUM!	0.0144916	#NUM!	2.62736		#N/A
D630013N20Rik	0	0	0	0	0	0	#DIV/0!	#DIV/0!	#DIV/0!	#DIV/0!	0		#N/A
Spsb4	0.156895	0.251386	0	0	0	0	0.0496106	#NUM!	#DIV/0!	#DIV/0!	0.408281		#N/A
C730027H18Rik	0	0	0	0	0	0	#DIV/0!	#DIV/0!	#DIV/0!	#DIV/0!	0		#N/A
Lrrc36	0.169178	0.271073	0	0.143098	0	0	0.0496151	#NUM!	0.42265	#NUM!	0.583349		#N/A
C330024D21Rik	0.124322	0.199209	0	0.104969	0	0	0.0496231	#NUM!	0.42265	#NUM!	0.4285		#N/A
A730017C20Rik	0.19809	0.317421	0	0	0	0	0.0496284	#NUM!	#DIV/0!	#DIV/0!	0.515511		#N/A
Grm2	0.102024	0.163486	0	0	0	0	0.0496306	#NUM!	#DIV/0!	#DIV/0!	0.26551		#N/A
4933400F21Rik	0.46683	0.748078	0.615982	0.315272	0	0	0.0496349	#NUM!	0.0903601	#NUM!	2.14616		#N/A
1700049L16Rik	0	0	0	0	0	0	#DIV/0!	#DIV/0!	#DIV/0!	#DIV/0!	0		#N/A
Plekhg4	0.0802626	0.128621	0	0	0	0	0.0496395	#NUM!	#DIV/0!	#DIV/0!	0.208884		#N/A
Dram1	3.78879	2.25216	7.42564	6.29476	16.9206	14.2902	0.0143344	2.3692	0.0257668	1.18572	50.9721		#N/A
Prlr	0.0314121	0.0503429	0	0.0530156	0	0	0.0496579	#NUM!	0.42265	#NUM!	0.134771		#N/A
Tmem51os1	0.204791	0.164049	1.35627	0.691982	0.574152	1.32918	0.179559	2.36746	0.898627	0.105866	4.32042		#N/A
1600020E01Rik	1.68321	0.673347	0	1.42743	9.61663	2.53519	0.304373	2.36642	0.275943	3.08968	15.9358		#N/A
A330049N07Rik	0	0	0	0	0	0	#DIV/0!	#DIV/0!	#DIV/0!	#DIV/0!	0		#N/A
2610020C07Rik	0	0.261177	1.5092	0.688324	0.684677	0.661514	0.0537348	2.36578	0.408785	0.706996	3.80489		#N/A
Rtdr1	0	0	0	0	0	0	#DIV/0!	#DIV/0!	#DIV/0!	#DIV/0!	0		#N/A
Klhl29	1.76661	0.633292	3.24599	3.29573	5.25448	7.10192	0.0442634	2.36421	0.0879034	0.917517	21.298		#N/A
Itpr1	18.2795	18.0464	24.7195	30.1301	31.5497	39.6501	0.0499834	0.970875	0.235263	0.376392	162.375		#N/A
Ybey	0.589295	0.590225	0.388525	0.497414	0.411465	0.478716	0.0500148	0.406029	0.976569	0.00689134	2.95564		#N/A
4933407G14Rik	0	0	0	0	0	0	#DIV/0!	#DIV/0!	#DIV/0!	#DIV/0!	0		#N/A
Plekha7	4.18115	3.22609	11.2323	14.7055	14.7068	23.3977	0.0724208	2.36295	0.323255	0.554905	71.4495		#N/A
Pigt	31.91	30.6566	32.5174	35.1649	41.2361	47.0926	0.0500252	0.49749	0.0847651	0.384104	218.578		#N/A
F7	0.769134	0.616134	0	0.324835	0.269444	0	0.0692029	2.36211	0.907592	0.269722	1.97955		#N/A
Chil1	0.857262	0.6867	0.283962	0.181051	0.30051	0	0.0692913	2.36115	0.656131	0.629858	2.30949		#N/A
Grk5	26.3039	23.9136	18.1418	17.2219	18.3092	15.2578	0.0501517	0.581147	0.629705	0.0752256	119.148		#N/A
Ccm2l	37.3681	41.7838	25.0244	26.7234	29.6068	30.3305	0.0501838	0.40117	0.0472725	0.211957	190.837		#N/A
Ccdc42b	0	1.06722	1.18673	0.751703	1.88157	3.59612	0.160626	2.35971	0.183388	1.49868	8.48334		#N/A
Gpc4	11.8509	7.33098	10.1145	6.08059	1.6796	2.07009	0.0766231	2.3549	0.0916923	2.11071	39.1267	TRUE	cell migration
Msln	2.49761	0.266783	0	0	0	0.540554	0.434835	2.35445	0.42265	#DIV/0!	3.30495		#N/A
Prtg	0.0371523	0.119084	0.0489285	0.188117	0.466443	0.332108	0.0550982	2.35365	0.101018	1.75222	1.19183		#N/A
Vps9d1	4.32421	4.55332	3.59019	2.60791	3.62841	3.2101	0.0505964	0.376476	0.609523	0.141856	21.9141		#N/A
Cthrc1	0.995045	1.59377	0	2.24316	5.13341	8.06271	0.0710825	2.34975	0.0972059	2.55651	18.0281	TRUE	cell migration
Gstt4	0	0	0	0	0	0	#DIV/0!	#DIV/0!	#DIV/0!	#DIV/0!	0		#N/A
Vps13d	11.8339	12.9679	10.1149	11.082	6.17949	8.31148	0.0507142	0.775291	0.103328	0.548699	60.4897		#N/A
Jak1	57.9307	44.418	69.1179	78.19	101.787	86.7768	0.0507364	0.88156	0.142966	0.356218	438.22		#N/A
Gimap5	21.9586	18.9101	24.7038	21.7926	29.4802	27.3223	0.0507954	0.474958	0.104592	0.288835	144.168		#N/A
Stk10	18.4213	14.9176	13.5196	9.26283	8.75522	9.39343	0.0508136	0.877344	0.394299	0.328059	74.27		#N/A
Cacna1d	0.0749518	0.0575256	0.394845	0.189751	0.522794	0.152274	0.281058	2.34929	0.850634	0.207593	1.39214		#N/A
Gm10033	1.51375	0.16248	1.61184	0.171338	0	0.329122	0.434925	2.34853	0.428838	2.43776	3.78853		#N/A
Ncald	1.87929	0.316956	1.38492	0.834985	0.276384	0.154968	0.377032	2.3481	0.0864811	2.36356	4.8475		#N/A
Vpreb3	0	0	0	0.679465	0	0	#DIV/0!	#DIV/0!	0.42265	#NUM!	0.679465		#N/A
Slc5a4b	0	0	0	0	0	0	#DIV/0!	#DIV/0!	#DIV/0!	#DIV/0!	0		#N/A
Pde4d	4.0887	3.72307	4.46827	4.74464	7.71503	6.30494	0.0508918	0.843762	0.0789196	0.605754	31.0446	FALSE	leukocyte migration
Slc5a4a	0	0	0	0	0	0	#DIV/0!	#DIV/0!	#DIV/0!	#DIV/0!	0		#N/A
Gm5134	0	0	0	0	0	0	#DIV/0!	#DIV/0!	#DIV/0!	#DIV/0!	0		#N/A
Mir6409	0	0	0	0	0	0	#DIV/0!	#DIV/0!	#DIV/0!	#DIV/0!	0		#N/A
Cd163	1.28587	0.0605773	0.897692	0.191515	5.81006	1.04459	0.379345	2.34793	0.354018	2.6538	9.2903		#N/A
Jak3	46.4764	46.1073	27.7887	36.4233	37.2313	40.6718	0.0513165	0.249077	0.278649	0.278838	234.699		#N/A
Taf1c	1.98103	1.83785	0.550515	2.11258	1.60305	1.60881	0.0514625	0.249741	0.758917	0.270305	9.69383		#N/A
Gpx8	10.1981	4.71126	2.09156	7.96091	1.65855	1.27053	0.161293	2.3477	0.34957	1.77903	27.8909		#N/A
Spatc1l	0	0	0	0	0	0	#DIV/0!	#DIV/0!	#DIV/0!	#DIV/0!	0		#N/A
Ftcd	0	0	0	0.107192	0	0	#DIV/0!	#DIV/0!	0.42265	#NUM!	0.107192		#N/A
Hoxa2	5.26691	5.51728	1.87807	2.73791	2.55554	3.61574	0.0514991	0.805276	0.372621	0.418933	21.5714		#N/A
Mir678	0	0	0	0	0	0	#DIV/0!	#DIV/0!	#DIV/0!	#DIV/0!	0		#N/A
Setbp1	1.01103	1.07151	3.26381	3.52283	4.59449	5.99006	0.0259484	2.34554	0.115893	0.641191	19.4537		#N/A
4930483K19Rik	0	0	0	0	0	0	#DIV/0!	#DIV/0!	#DIV/0!	#DIV/0!	0		#N/A
Scimp	0.374231	0.299679	0	0	0.527196	0.606215	0.0516075	0.750043	0.00482543	#DIV/0!	1.80732		#N/A
Smoc1	0.292724	0	0	0.411922	1.09108	0.396287	0.253934	2.34515	0.314519	1.85232	2.19201		#N/A
Sh3tc1	19.3258	18.7698	15.5407	15.8183	14.4138	16.1158	0.0516998	0.319416	0.678025	0.0386709	99.9842		#N/A
Gm10787	0	0	0	0	0	0	#DIV/0!	#DIV/0!	#DIV/0!	#DIV/0!	0		#N/A
Pxn	57.2086	51.0696	54.0832	49.0011	66.7199	68.4785	0.0519276	0.320335	0.0269153	0.391253	346.561	FALSE	endothelial cell migration
2610028H24Rik	0	0	0	0	0	0	#DIV/0!	#DIV/0!	#DIV/0!	#DIV/0!	0		#N/A
AI462493	11.6889	12.2058	12.2439	11.1821	16.5314	19.3208	0.0519401	0.585371	0.0531352	0.613951	83.1729		#N/A
Igf2	8.02682	10.0986	11.9892	7.97489	1.40149	2.16937	0.0222786	2.34367	0.0569046	2.48306	41.6604		#N/A
Ormdl3	10.671	8.82885	9.25883	6.35317	5.88024	4.96883	0.052076	0.845892	0.258256	0.525084	45.9609		#N/A
Jag2	45.9362	52.8264	27.026	24.6186	8.19374	11.2745	0.00893875	-2.34284	0.014446	-1.4075	169.875		#N/A
Gucy2c	0	0.0696002	0	0	0	0.352924	0.513439	2.34219	0.42265	#DIV/0!	0.422524		#N/A
Gm17769	0	0	0	0	0	0	#DIV/0!	#DIV/0!	#DIV/0!	#DIV/0!	0		#N/A
Aen	3.88329	3.32563	4.46902	3.50502	7.69125	6.20214	0.0521962	0.946544	0.0792753	0.801016	29.0763		#N/A
D8Ertd82e	17.0988	16.8754	6.32319	6.10155	2.52338	4.17856	0.00372953	2.34179	0.0756193	0.890565	53.1009		#N/A
Mettl24	0	0.192417	0	0.811867	0	0.974118	0.513609	2.33986	0.909894	0.262853	1.9784		#N/A
Rasgrf2	9.86082	10.2575	10.6065	5.6116	2.65081	1.3232	0.00728574	2.33984	0.141354	2.02894	40.3104		#N/A
2210407C18Rik	0.472001	0	3.78577	0	2.0005	0.381927	0.374717	2.33557	0.765696	0.668155	6.6402		#N/A
Fkbp5	18.2382	11.4274	19.2705	18.9711	29.5841	28.7855	0.0526109	0.976426	0.00179063	0.610074	126.277		#N/A
Tmem53	0	0	0	0.611264	0.662717	1.07881	0.0526197	#DIV/0!	0.265978	1.51049	2.35279		#N/A
1700009J07Rik	0	0	0	0	0	0	#DIV/0!	#DIV/0!	#DIV/0!	#DIV/0!	0		#N/A
Golga2	10.8349	11.5274	12.6692	8.13056	14.7787	16.8925	0.0526294	0.502103	0.162055	0.606605	74.8333		#N/A
Me3	0	0.611764	0.604114	1.67562	0.853032	2.23278	0.242841	2.3346	0.689819	0.436785	5.97731		#N/A
Ubqln2	11.0009	10.8544	13.1754	10.6631	17.5104	14.9729	0.052713	0.571715	0.136528	0.446405	78.1771		#N/A
Abhd17c	6.10083	3.75967	5.79198	12.1538	29.7809	19.9349	0.0588469	2.33397	0.113443	1.47006	77.5221		#N/A
Mir1930	0	0	0	0	0	0	#DIV/0!	#DIV/0!	#DIV/0!	#DIV/0!	0		#N/A
Myo6	11.0796	9.5765	10.1117	8.47481	6.88944	5.66505	0.0527702	0.718364	0.0982142	0.566052	51.7971		#N/A
Ptgs1	11.4729	7.3727	20.5183	24.3176	50.9692	43.8618	0.0114607	2.33113	0.0250141	1.0807	158.512		#N/A
Kdm5c	11.178	11.7859	11.6963	11.3192	9.14866	9.87334	0.0530401	0.271699	0.0393903	0.274937	65.0014		#N/A
Mab21l3	0	0.227971	0	0.160129	0.5301	0.616232	0.0637573	2.3301	0.0323511	2.83972	1.53443		#N/A
Stau2	0.622581	0.299281	0	0.841071	2.81544	1.81981	0.0710971	2.33002	0.10052	2.46235	6.39818		#N/A
Zfp433	0	0.233853	0	0.369737	0.816961	0.355431	0.211353	2.32578	0.307563	1.66488	1.77598		#N/A
Mir6410	0	0	0	0	0	0	#DIV/0!	#DIV/0!	#DIV/0!	#DIV/0!	0		#N/A
Epha1	1.34749	1.91012	0	1.05009	0.144874	0.505068	0.0598047	2.32543	0.753022	0.69213	4.95764		#N/A
Mir7659	0	0	0	0	0	0	#DIV/0!	#DIV/0!	#DIV/0!	#DIV/0!	0		#N/A
Mex3d	8.74965	8.67948	6.04969	6.85915	7.57059	6.85189	0.0531282	0.273181	0.296902	0.15996	44.7604		#N/A
Olfr1357	0	0	0	0	0	0	#DIV/0!	#DIV/0!	#DIV/0!	#DIV/0!	0		#N/A
Prkd2	46.7854	46.4252	38.7818	39.0987	30.1908	36.5413	0.0531478	0.482113	0.221638	0.222881	237.823		#N/A
Zfp870	0.31231	0.450447	0	0.316319	0	0.152241	0.0971386	2.32487	0.686197	1.05502	1.23132		#N/A
Mir6907	0	0	0	0	0	0	#DIV/0!	#DIV/0!	#DIV/0!	#DIV/0!	0		#N/A
Gen1	0	0.165558	0	0.174446	0.577608	0.251714	0.211042	2.3246	0.218467	2.24915	1.16933		#N/A
Mir6908	0	0	0	0	0	0	#DIV/0!	#DIV/0!	#DIV/0!	#DIV/0!	0		#N/A
Ccdc105	0	0	0	0	0	0	#DIV/0!	#DIV/0!	#DIV/0!	#DIV/0!	0		#N/A
Casp14	0	0	0	0	0	0	#DIV/0!	#DIV/0!	#DIV/0!	#DIV/0!	0		#N/A
Olfr1356	0	0	0	0	0	0	#DIV/0!	#DIV/0!	#DIV/0!	#DIV/0!	0		#N/A
Slc1a6	0	0	0	0	0	0	#DIV/0!	#DIV/0!	#DIV/0!	#DIV/0!	0		#N/A
Actn2	0.114434	0	0	0	0.479976	0.0929232	0.373784	2.32377	0.27697	#DIV/0!	0.687333		#N/A
Fam171a1	17.0257	14.7409	23.6263	25.9508	29.1904	24.4481	0.0533325	0.755758	0.522289	0.113595	134.982		#N/A
Olfr1355	0	0	0	0	0	0	#DIV/0!	#DIV/0!	#DIV/0!	#DIV/0!	0		#N/A
Olfr1354	0	0	0	0	0	0	#DIV/0!	#DIV/0!	#DIV/0!	#DIV/0!	0		#N/A
Olfr8	0	0	0	0	0	0	#DIV/0!	#DIV/0!	#DIV/0!	#DIV/0!	0		#N/A
Olfr1353	0	0	0	0	0	0	#DIV/0!	#DIV/0!	#DIV/0!	#DIV/0!	0		#N/A
Olfr1352	0	0	0	0	0	0	#DIV/0!	#DIV/0!	#DIV/0!	#DIV/0!	0		#N/A
Olfr1351	0	0	0	0	0	0	#DIV/0!	#DIV/0!	#DIV/0!	#DIV/0!	0		#N/A
Vmn2r81	0	0	0	0	0	0	#DIV/0!	#DIV/0!	#DIV/0!	#DIV/0!	0		#N/A
Fnbp1	12.5167	8.5228	15.0111	11.8379	19.0043	18.6748	0.0534	0.840664	0.0768979	0.488896	85.5676		#N/A
Vmn2r80	0	0	0	0	0	0	#DIV/0!	#DIV/0!	#DIV/0!	#DIV/0!	0		#N/A
Vmn2r83	0	0	0	0	0	0	#DIV/0!	#DIV/0!	#DIV/0!	#DIV/0!	0		#N/A
Vmn2r82	0	0	0	0	0	0	#DIV/0!	#DIV/0!	#DIV/0!	#DIV/0!	0		#N/A
Crybg3	11.5879	10.4109	10.6411	9.27177	8.61059	8.47818	0.0535578	0.364376	0.176501	0.220653	59.0004		#N/A
Tspear	0	0	0	0	0	0	#DIV/0!	#DIV/0!	#DIV/0!	#DIV/0!	0		#N/A
Gm19402	0	0	0	0	0	0	#DIV/0!	#DIV/0!	#DIV/0!	#DIV/0!	0		#N/A
Gm10272	0	0	0	0	0	0	#DIV/0!	#DIV/0!	#DIV/0!	#DIV/0!	0		#N/A
Gm10024	0	0	0	0	0	0	#DIV/0!	#DIV/0!	#DIV/0!	#DIV/0!	0		#N/A
Gm10142	0	0	0	0	0	0	#DIV/0!	#DIV/0!	#DIV/0!	#DIV/0!	0		#N/A
Krtap12-1	0	0	0	0	0	0	#DIV/0!	#DIV/0!	#DIV/0!	#DIV/0!	0		#N/A
Gm10100	0	0	0	0	0	0	#DIV/0!	#DIV/0!	#DIV/0!	#DIV/0!	0		#N/A
Gm3238	0	0	0	0	0	0	#DIV/0!	#DIV/0!	#DIV/0!	#DIV/0!	0		#N/A
Gm19668	0	0	0	0	0	0	#DIV/0!	#DIV/0!	#DIV/0!	#DIV/0!	0		#N/A
Gm2696	0	0	0	0	0	0	#DIV/0!	#DIV/0!	#DIV/0!	#DIV/0!	0		#N/A
Krtap10-4	0	0	0	0	0	0	#DIV/0!	#DIV/0!	#DIV/0!	#DIV/0!	0		#N/A
Krtap10-10	0	0	0	0	0	0	#DIV/0!	#DIV/0!	#DIV/0!	#DIV/0!	0		#N/A
Gm10318	0	0	0	0	0	0	#DIV/0!	#DIV/0!	#DIV/0!	#DIV/0!	0		#N/A
Gm3285	0	0	0	0	0	0	#DIV/0!	#DIV/0!	#DIV/0!	#DIV/0!	0		#N/A
Theg	0	0	0	0	0	0	#DIV/0!	#DIV/0!	#DIV/0!	#DIV/0!	0		#N/A
Odf3l2	0	0	0	0	0	0	#DIV/0!	#DIV/0!	#DIV/0!	#DIV/0!	0		#N/A
Dusp7	16.8152	13.8115	11.4475	9.01768	9.16499	7.81545	0.0535913	0.850916	0.336619	0.269298	68.0723		#N/A
Itgb8	0.11	0	0	0.185738	0.46132	0.0893268	0.373773	2.32362	0.472702	1.56786	0.846385		cell migration
Mir6909	0	0	0	0	0	0	#DIV/0!	#DIV/0!	#DIV/0!	#DIV/0!	0		#N/A
Cbln3	0.0703845	0	0	0	0.294841	0.0571789	0.373669	2.32233	0.276733	#DIV/0!	0.422404		#N/A
Rnf145	17.788	13.1342	14.8473	20.3331	25.6083	24.7994	0.0540452	0.705001	0.110969	0.518872	116.51		#N/A
Chchd7	4.54536	6.13258	6.04118	6.6862	9.7997	8.74155	0.0541192	0.796105	0.0425552	0.542803	41.9466		#N/A
Atf3	221.779	172.199	288.986	262.244	299.09	299.18	0.054159	0.602682	0.220646	0.118142	1543.48		#N/A
Sepn1	10.9928	9.67275	15.6731	11.3517	13.0303	13.073	0.0542376	0.337004	0.850908	0.0500517	73.7937		#N/A
Rasd2	1.22078	0.586845	0.967441	2.47377	4.26795	4.75792	0.0120975	2.31997	0.071883	1.39115	14.2747		#N/A
Fgf22	0	0	0	0	0	0	#DIV/0!	#DIV/0!	#DIV/0!	#DIV/0!	0		#N/A
Tbc1d30	0.810911	0.510536	2.21374	2.88431	2.82973	3.76485	0.0329861	2.31916	0.323095	0.371335	13.0141		#N/A
Slc9a3r2	201.862	175.229	89.2625	80.1268	40.504	35.3812	0.0080103	-2.31302	0.0123163	-1.15845	622.365		#N/A
Glb1	7.54775	8.3726	9.20944	7.96704	13.6645	11.5473	0.0549231	0.663227	0.0820137	0.553665	58.3086		#N/A
Ggct	1.09962	1.32109	0.729996	2.32319	8.88139	3.12026	0.238441	2.30973	0.273066	1.97485	17.4755		#N/A
Tnk2	18.9505	22.2446	10.5149	11.4038	11.3385	13.5785	0.0549936	0.725342	0.33948	0.184968	88.0308		#N/A
Rem1	6.82508	1.82234	3.61884	1.92206	0.638246	1.10719	0.303263	2.30868	0.16383	1.66653	15.9338		#N/A
Gm5512	3.35e-05	1.32048	4.8e-05	1.15e-05	5.20037	1.33738	0.329535	2.3077	0.232646	16.7455	7.85832		#N/A
Fam65b	0.664868	1.08157	1.78737	1.14018	5.7287	2.90669	0.137075	2.30585	0.187447	1.56057	13.3094		#N/A
B4galt5	8.19055	7.45473	9.22916	11.948	10.6623	9.75377	0.0551345	0.383978	0.815486	0.0528039	57.2385		#N/A
Sidt2	21.7571	21.5811	19.4413	21.5384	23.8366	25.2296	0.0551615	0.17909	0.0847832	0.25982	133.384		#N/A
Marcksl1-ps4	0	1.51984	0	0	0	0.307433	0.51615	2.30558	0.42265	#DIV/0!	1.82727		#N/A
Spaca6	0	1.41991	0.472126	0	0	0.287275	0.516171	2.3053	0.769839	0.716739	2.17931		#N/A
Rpn2	48.3799	37.8477	44.3354	41.2772	64.8307	64.3715	0.0552391	0.583409	0.00499557	0.593736	301.042		#N/A
Cideb	0	2.63159	0	0.555565	0	0.532531	0.516194	2.305	0.97884	0.0610902	3.71969		#N/A
Gsg1	0	1.25242	1.24738	1.32183	0	0.253456	0.5162	2.30491	0.012764	3.34152	4.07509		#N/A
Glt28d2	0.627992	0.704389	0.663638	1.16653	1.40527	1.12176	0.0554334	0.923436	0.350786	0.465467	5.68958		#N/A
Foxa2	0.165381	0.273175	0	0.720058	0	0	0.0554381	#NUM!	0.42265	#NUM!	1.15861		#N/A
Poc1b	4.16118	3.53591	3.16484	2.12938	1.93993	2.45716	0.0554829	0.807764	0.519381	0.267869	17.3884		#N/A
Mapk3	100.466	87.6326	60.2141	63.6071	53.4851	64.8784	0.0555611	0.668265	0.691229	0.0650341	430.283		#N/A
Nfkbil1	9.80569	8.65972	6.33762	6.16104	4.58809	6.1167	0.0555964	0.786569	0.363925	0.223517	41.6689		#N/A
Ik	31.4303	29.8731	40.4169	29.9956	41.5368	37.4669	0.0556025	0.365953	0.522817	0.166089	210.72		#N/A
Bdkrb1	0	1.12423	0	0.23725	0	0.227585	0.516234	2.30446	0.979217	0.0600026	1.58906	TRUE	cell migration
Cdh5	632.303	595.382	447.871	436.343	413.784	485.727	0.0556919	0.448728	0.853153	0.0247453	3011.41		#N/A
Mvb12b	8.56398	8.93669	10.3271	8.01288	11.9568	10.7329	0.0557549	0.374627	0.238497	0.307045	58.5303		#N/A
Nrtn	1.55551	0	0	0	0	0.314924	0.516245	2.30431	0.42265	#DIV/0!	1.87043	#DIV/0!	neural crest cell migration
Bad	16.4162	15.7618	17.8551	9.90921	11.0227	12.9404	0.0557973	0.42526	0.687625	0.212417	83.9054		#N/A
Mir6910	0	0	0	0	0	0	#DIV/0!	#DIV/0!	#DIV/0!	#DIV/0!	0		#N/A
Ifitm10	0.105127	0.084229	0	0	0.14694	0.170747	0.0558752	0.746505	0.00556892	#DIV/0!	0.507043		#N/A
Apbb1	3.63645	3.44095	3.49625	2.91488	2.78846	2.35216	0.0558775	0.461277	0.222591	0.318636	18.6292	FALSE	neuron migration
Efhd1	5.96323	9.87232	3.15876	3.69395	0	0	0.0558788	#NUM!	0.00604421	#NUM!	22.6883		#N/A
Myl6b	1.54982	0	0.516432	0.327653	0	0.313777	0.516247	2.30429	0.284551	1.42765	2.70768		#N/A
Cul7	8.06332	9.04543	8.10827	7.15844	10.5052	10.9186	0.0559151	0.32448	0.0271583	0.488825	53.7993		#N/A
4931406P16Rik	48.9219	44.9307	35.7512	39.1346	39.0536	38.4574	0.0559163	0.275996	0.524631	0.0497089	246.249		#N/A
Sh3rf3	0.114058	0.0913932	0.150312	0.0481324	0.875605	0.139006	0.38674	2.30406	0.386907	2.35412	1.41851		#N/A
Adamts10	10.0508	8.3288	4.46375	8.01342	14.0611	12.8421	0.056157	0.549672	0.0615071	1.10849	57.76		#N/A
Fam32a	23.1669	19.5979	26.2492	25.8294	28.562	30.3791	0.0561807	0.46285	0.0665647	0.178583	153.785		#N/A
F420014N23Rik	0	0.581414	0.575565	0	0	0.117814	0.51634	2.30305	0.517447	2.28847	1.27479		#N/A
Mpp4	7.89e-98	0.595285	4.93e-225	1.36e-190	0	0.120633	0.516348	2.30296	0.42265	627.671	0.715918		#N/A
Atp2b4	26.4113	25.9905	23.657	23.3838	18.934	21.7958	0.0562807	0.363532	0.159338	0.207828	140.172		#N/A
Mir6911	0	0	0	0	0	0	#DIV/0!	#DIV/0!	#DIV/0!	#DIV/0!	0		#N/A
Ccser1	0.817013	0.796512	1.62057	3.60483	4.64316	3.31902	0.0408634	2.30295	0.370001	0.607622	14.8011		#N/A
Sh3bgr	1.14003	0	0	0	0	0.231043	0.516356	2.30284	0.42265	#DIV/0!	1.37107		#N/A
Plk5	0	0	0	0	0	0	#DIV/0!	#DIV/0!	#DIV/0!	#DIV/0!	0		#N/A
Gab3	2.81441	3.44832	0.656962	2.65652	1.62265	1.88112	0.0564091	0.837884	0.933412	0.08056	13.08		#N/A
Dmrtb1	0.8001	0	0.264897	0.506892	0	0.162288	0.516448	2.30162	0.171563	2.24965	1.73418		#N/A
Fam71b	0.640859	0	0	0	0	0.13004	0.516491	2.30105	0.42265	#DIV/0!	0.770899		#N/A
Zfp106	8.8667	6.76131	9.22831	10.1678	12.0193	12.0868	0.0565473	0.625264	0.037743	0.313631	59.1302		#N/A
Crmp1	0	0	0	0.0971549	0.160888	0.267334	0.0565957	#DIV/0!	0.148433	2.14	0.525377		#N/A
Med15	16.5814	16.0867	12.9578	17.5113	18.4534	19.7328	0.0565988	0.225169	0.244351	0.325704	101.323		#N/A
Eef2k	2.32904	2.48834	1.77308	3.05767	3.61151	3.15402	0.0566314	0.489954	0.291736	0.485956	16.4137		#N/A
Ceacam2	0.419889	0	0.138508	0.265853	0	0.0852138	0.516507	2.30085	0.172681	2.24648	0.909464		#N/A
Scaf1	30.6632	29.0594	20.3792	27.2349	25.1601	26.4035	0.0566572	0.211924	0.627955	0.114964	158.9		#N/A
Fam222b	5.87773	6.7872	3.76288	4.81574	3.62254	4.35294	0.0566641	0.667196	0.684206	0.105174	29.219		#N/A
Tenc1	57.991	55.6351	36.9726	42.0921	29.1946	39.9953	0.0566789	0.715661	0.49558	0.192472	261.881		#N/A
Eomes	0.368326	0	0	0.233185	0	0.0747562	0.516516	2.30072	0.583985	1.64121	0.676267		#N/A
Vgll3	0.406919	0	0.268541	0	0	0.0826176	0.516554	2.30022	0.576183	1.70062	0.758078		#N/A
Tmem88b	0.389474	0	0	0	0	0.0790792	0.516559	2.30016	0.42265	#DIV/0!	0.468553		#N/A
Glycam1	0	0	0	0.634503	33.0568	54.981	0.0567857	#DIV/0!	0.0575872	7.11635	88.6723		#N/A
Mir6912	0	0	0	0	0	0	#DIV/0!	#DIV/0!	#DIV/0!	#DIV/0!	0		#N/A
Tbc1d8	7.73774	3.8524	13.2746	15.3455	23.0807	33.9915	0.0591508	2.29989	0.124526	0.995759	97.2824		#N/A
Grhl2	0.268294	0.161233	0.0884242	0.0566136	0	0	0.0568784	#NUM!	0.0448897	#NUM!	0.574565		#N/A
Map3k15	0.307023	0	0	0.323948	0	0.0623509	0.516581	2.29986	0.510921	2.37728	0.693322		#N/A
Foxf2	0.588658	0.353701	0.194541	0.248546	0	0	0.0569099	#NUM!	0.0145325	#NUM!	1.38545		#N/A
Pcolce2	0.765892	0.460153	0.506995	0.323464	0	0	0.0569272	#NUM!	0.045531	#NUM!	2.0565		#N/A
Csf2rb	94.0043	64.1473	126.789	137.678	137.88	150.923	0.0569306	0.868778	0.288415	0.126998	711.422		#N/A
Jsrp1	0	0	0	0.59041	0	0	#DIV/0!	#DIV/0!	0.42265	#NUM!	0.59041		#N/A
4930579G24Rik	1.62262	1.4443	0.238602	0.609107	0.757653	1.02414	0.0569835	0.783461	0.177295	1.07169	5.69642		#N/A
Arrb1	12.7757	11.2021	31.9275	42.8687	54.9104	63.1275	0.007819	2.29948	0.0872292	0.658213	216.812		#N/A
Syde1	10.8306	9.25619	8.30516	5.92154	5.33418	6.61774	0.0570679	0.749005	0.489206	0.251359	46.2654		#N/A
Fam118b	2.14604	2.38818	4.2652	1.10114	4.03329	3.36095	0.0571337	0.705547	0.594736	0.462463	17.2948		#N/A
Brpf1	13.0754	11.9698	9.89379	9.45708	9.99909	10.3748	0.057179	0.297813	0.21775	0.074323	64.77		#N/A
Pdlim3	0.231646	0.556653	1.22843	2.34854	1.62487	2.25462	0.0487468	2.29905	0.83579	0.117129	8.24476		#N/A
Irak2	13.3966	12.1817	6.31592	6.37311	8.17388	5.43978	0.0572158	0.909865	0.767473	0.101473	51.881		#N/A
Abca13	0.0201177	0.0161213	0	0	0.0280502	0.0327027	0.0572729	0.74541	0.00581351	#DIV/0!	0.0969919		#N/A
Bace2	8.64581	5.26767	15.0903	17.3339	35.9863	32.4782	0.00787641	2.29887	0.0130886	1.07829	114.802		#N/A
Lrp3	5.87493	5.11075	4.09615	2.40877	2.34474	3.4086	0.0573343	0.933153	0.742558	0.177132	23.2439		#N/A
Diras1	0	0	0	0.0988944	0	0	#DIV/0!	#DIV/0!	0.42265	#NUM!	0.0988944		#N/A
Pla2g6	2.65402	2.36791	3.06798	3.10051	3.44358	3.97126	0.0575463	0.562174	0.142464	0.265498	18.6053		#N/A
Gm5547	0	0	0	3.18938	1.80481	3.01385	0.0575719	#DIV/0!	0.679994	0.595356	8.00804		#N/A
Aebp1	10.7545	10.3356	25.5259	21.4291	41.0027	62.3352	0.0611864	2.29273	0.12188	1.13802	171.383		#N/A
Tle4	4.53238	4.62741	4.72324	6.60242	6.53339	7.83892	0.0576623	0.649906	0.314511	0.343697	34.8578		#N/A
Rgs5	346.393	113.884	284.362	137.005	48.6314	45.3665	0.255897	2.2918	0.156478	2.16438	975.642		#N/A
Il2rb	0.382998	0.409132	0.505958	0.431181	2.32129	1.55482	0.0566376	2.2908	0.0623126	2.04827	5.60538		#N/A
Tmc4	0.594157	0.238003	1.1782	0.752611	2.49458	1.5675	0.0829503	2.28729	0.171879	1.07301	6.82505		#N/A
Ccdc114	0	0.226676	0.93487	0.238918	0.989723	0.114845	0.433828	2.28478	0.956259	0.0876896	2.50503		#N/A
Mir1982	0	0	0	0	0	0	#DIV/0!	#DIV/0!	#DIV/0!	#DIV/0!	0		#N/A
Mir5615-1	0	0	0	0	0	0	#DIV/0!	#DIV/0!	#DIV/0!	#DIV/0!	0		#N/A
Mir5615-2	0	0	0	0	0	0	#DIV/0!	#DIV/0!	#DIV/0!	#DIV/0!	0		#N/A
Ndrg1	108.018	81.134	139.054	145.3	146.402	154.935	0.0577877	0.671832	0.249503	0.0836897	774.843		#N/A
Plxna2	23.6359	27.9751	19.9861	21.1843	14.0867	16.9183	0.0577996	0.735178	0.0805818	0.409107	123.786	FALSE	cerebellar granule cell precursor tangential migration
Mn1	5.15401	5.50651	1.91011	3.21712	2.69746	3.70786	0.0578149	0.734935	0.520067	0.321091	22.1931		#N/A
Prdm16	3.89988	3.60323	1.42492	1.68245	0.955845	0.584705	0.00628988	2.28404	0.0740148	1.01225	12.151		#N/A
Trem2	3.59014	0.287458	0	0	0.505461	0.290797	0.450131	2.28386	0.0656077	#DIV/0!	4.67386		#N/A
3110009E18Rik	1.09217	1.82665	0	0	0	0	0.0578779	#NUM!	#DIV/0!	#DIV/0!	2.91882		#N/A
Atcayos	0	0	0	0	0	0	#DIV/0!	#DIV/0!	#DIV/0!	#DIV/0!	0		#N/A
Wnt5a	0.0901835	0	0.356964	0.456799	0.252003	0.186782	0.0885938	2.28258	0.0879932	0.891094	1.34273	TRUE	planar cell polarity pathway involved in gastrula mediolateral intercalation
Pim1	68.2104	60.565	70.4833	64.2153	81.7945	89.1756	0.0579705	0.408887	0.0644584	0.344009	434.444		#N/A
Bend4	1.64547	1.87892	5.79762	8.99151	9.01055	8.12309	0.00451583	2.28139	0.552706	0.212294	35.4472		#N/A
Rfk	13.6873	8.2802	25.8413	19.2236	57.8423	48.8686	0.0149427	2.28026	0.0311916	1.24363	173.743		#N/A
Plet1	0.387614	0.931521	0	0.491118	0.271591	0	0.227013	2.28008	0.733414	0.854634	2.08184	TRUE	wound healing"
Mir3057	0	0	0	0	0	0	#DIV/0!	#DIV/0!	#DIV/0!	#DIV/0!	0		#N/A
Cox6b2	0	0	0	0	4.80459	2.8683	0.0581807	#DIV/0!	0.0581807	#DIV/0!	7.67289		#N/A
Krt14	0.874352	0.350192	0	0	3.98501	1.95048	0.154177	2.27712	0.100153	#DIV/0!	7.16003		#N/A
Xirp1	0.225767	0.135679	0	2.04838	0.787796	0.963027	0.019524	2.27618	0.898188	0.22645	4.16065		#N/A
Dnah1	0	0.0603487	0	0.105916	0.210039	0.0816099	0.244664	2.27284	0.380619	1.46131	0.457914		#N/A
Asf1a	4.34331	3.47953	2.76574	1.90193	2.2521	2.08904	0.0582307	0.849619	0.745961	0.104629	16.8316		#N/A
Rnf152	1.31829	1.79459	1.73629	0.96716	0.486792	0.157525	0.0508587	2.27241	0.132947	2.06896	6.46065		#N/A
Supt16	16.026	13.0194	14.871	13.59	20.6188	20.3719	0.0582608	0.496987	0.0106676	0.52631	98.4971		#N/A
Gm5901	0.798255	1.9176	0	0.337547	0.562678	0	0.227813	2.27102	0.764228	0.737221	3.61608		#N/A
Btla	0.420021	0.252395	0.277219	0.1773	2.64186	0.596629	0.337594	2.26789	0.306955	2.83291	4.36542		#N/A
D930015M05Rik	0.968771	1.55171	0	0.818932	0	0.523366	0.125545	2.26781	0.789764	0.645923	3.86278		#N/A
Mir6913	0	0	0	0	0	0	#DIV/0!	#DIV/0!	#DIV/0!	#DIV/0!	0		#N/A
Celf5	0	0	0	0	0	0	#DIV/0!	#DIV/0!	#DIV/0!	#DIV/0!	0		#N/A
Vtn	30.565	13.731	17.5079	15.3523	4.34271	4.85888	0.172568	2.26722	0.00866362	1.83639	86.3578	TRUE	cell migration
Snord37	0	0	0	0	0	0	#DIV/0!	#DIV/0!	#DIV/0!	#DIV/0!	0		#N/A
Pars2	0.156959	0.125746	0.623386	0	1.09111	0.269578	0.320101	2.26697	0.548835	1.12614	2.26678		#N/A
Psg23	0.483323	0.774404	0	1.49665	0	0.261527	0.125825	2.26579	0.501636	2.51671	3.0159		#N/A
Cds2	41.4983	39.2791	42.0665	35.0789	28.997	33.1635	0.0586932	0.377954	0.206826	0.311582	220.083		#N/A
Dnajc30	7.66064	9.06917	3.54491	6.47616	5.15513	5.66747	0.0587602	0.628374	0.812898	0.111011	37.5735		#N/A
Ptrf	414.192	342.853	300.346	273.825	214.133	241.62	0.0587678	0.732127	0.090185	0.333228	1786.97		#N/A
Gm5088	0.316007	0.506378	0	0.266787	0	0.171086	0.125922	2.26509	0.791188	0.640967	1.26026		#N/A
[truncated: 21,950 more rows]
